# Supplementary material
Source: PubMed Central journal article supplement (PMC4124529)
Supplement: NIHMS608641-supplement-suppl_methdos___gene_list.pdf [file NIHMS608641-supplement-suppl_methdos___gene_list.pdf]

## Supplemental Methods

### Microarray Data Sets

The airway BC signature was previously characterized in our laboratory by genome-wide comparison of the BC transcriptome *vs* transcriptome of the intact airway epithelium derived from healthy nonsmokers, using Affymetrix HG-U133 Plus 2.0 (Affymetrix, Santa Clara, CA) [1]. The 199 lung adenoCa data set originally described by Chitale et al ([http://cbio.mskcc.org/Public/lung\\_array\\_data/](http://cbio.mskcc.org/Public/lung_array_data/)) [2] was used as the primary adenoCa cohort, which was re-reviewed histologically and updated with regard to clinical information (survival data). Of the 199 individuals, there were 182 with available microarray data and detailed clinical information. Those excluded individuals with unspecified gender (n=6), pathological stage IV (n=3) and unknown (n=2) or tumor pathology other than adenoCa (n=6). The transcriptome profiling of this data set was with the Affymetrix HG-U133A (n=87) and HG-U133A 2.0 (n=95) microarrays. Of the 1161 airway BC signature genes [1], 862 were on the microarrays; for the purpose of the present study, these 862 genes are referred to as the “airway BC signature.” The 544 non-BC signature genes (i.e., genes up-regulated in the intact airway epithelium *vs*. airway BC) on the microarray were also analyzed.

To visualize similarity and differences between various carcinoma subtypes, lung adenoCa, lung SqCa and airway BC were compared using principal component analysis (PCA; GeneSpring software) based on expression of the airway BC signature [1]. All cancer data sets used for this analysis were based on the Affymetrix HG-U133 Plus 2.0 array and are publically available at the Gene Expression Omnibus (GEO), including: 68 lung adenoCa (GSE12667) [3], 40 lung adenoCa (GSE19188) [4], 40 lung adenoCa and 18 lung SqCa (GSE10245) [5], 55 colorectal cancer (GSE17537) [6], 129 breast cancer (GSE5460) [7], 91 hepatocellular carcinoma (GSE9843) [8] and 39 pancreatic cancer (GSE15471) [9].

To validate the relationship of the expression of airway BC signature genes to survival for adenoCa, two independent lung adenoCa data sets were assessed, including 58 adenoCa (validation cohort 1, <http://data.cgt.duke.edu/oncogene.php> and GSE3141) [10] and 327 of 442 adenoCa (validation cohort 2, <https://caarraydb.nci.nih.gov/caarray/publicExperimentDetailAction.do?ex>) [11], excluding 104 subjects analyzed in Memorial Sloan Kettering Cancer Center, the majority of which are present in the primary cohort, and 11 large cell neuroendocrine carcinoma samples identified based on pathologic re-evaluation [12].

### **Calculation of the BC index ( $I_{BC}$ ) for each individual subject**

For each airway BC signature gene, the median expression level was determined with respect to each array. Then the  $I_{BC}$  was calculated for each subject as a number of the airway BC genes having expression levels higher than median level in the analyzed cohort using the formula:

$$I_{BC} = \sum_{n=1}^{862} E_n$$

where  $E_1$  had a value of 1 if the expression level for gene 1 was >median level of adenoCa subjects or had a value of 0 if the expression level is ≤median level of adenoCa subjects;  $E_2$  is the index for gene 2, etc.

### **Comparison of Differentiation-associated Molecular Patterns in BC-high vs BC-low**

#### **AdenoCa**

To determine differences in the expression of differentiation-associated molecular features in BC-high vs BC-low adenoCa, expression of genes associated with the major cell types of the human airway epithelium were compared in the lung adenoCa subtypes of the primary cohort. The genes assessed included those associated with ciliated cells [forkhead box J1

(FOXJ1) and dynein axonemal intermediate chain 1 (DNAI1)]; mucus-secreting cells [mucin 5AC (MUC5AC) and trefoil factor 3 (TFF3)] [13]; Clara cells [NK2 homeobox 1 (NKX2-1) and secretoglobin 1A1 (SCGB1A)] [14], and neuroendocrine cells [synaptophysin (SYP) and chromogranin A (CHGA)] [15]. In addition, expression of genes related to epithelial-mesenchymal transition (EMT), including snail homolog 1 (SNAI1), snail homolog 2 (SNAI2), twist homolog 1 (TWIST1), and N-cadherin (CDH2) [16] were also analyzed.

### **Comparative Analysis of Airway BC Signature Gene Expression in Lung AdenoCa and Lung Squamous Cell Carcinoma (SqCa)**

To compare the expression of the airway BC signature in lung adenoCa to SqCa, the 58 adenoCa and 53 SqCa described by Bild et al [10] was analyzed. To compare the overall airway BC signature expression between adenoCa and SqCa, the BC index was calculated based on the median level of each airway BC signature gene in the adenoCa subjects, and the  $I_{BC}$  values were assessed using Mann-Whitney test. For identification of the airway BC signature genes differentially expressed in BC-high adenoCa vs SqCa, the criteria used was  $p < 0.05$  with a Benjamini-Hochberg correction to limit the false positive rate. Differential expression of selected airway BC signature genes in the analyzed lung cancer subtypes (BC-low adenoCa, BC-high adenoCa and SqCa) was additionally analyzed using Mann-Whitney test.

## References

1. Hackett NR, Shaykhiev R, Walters MS, et al. The Human Airway Epithelial Basal Cell Transcriptome. *PLoS One* 2011; 6: e18378.
2. Chitale D, Gong Y, Taylor BS, et al. An Integrated Genomic Analysis of Lung Cancer Reveals Loss of DUSP4 in EGFR-Mutant Tumors. *Oncogene* 2009; 28: 2773-2783.
3. Ding L, Getz G, Wheeler DA, et al. Somatic Mutations Affect Key Pathways in Lung Adenocarcinoma. *Nature* 2008; 455: 1069-1075.
4. Hou J, Aerts J, den HB, et al. Gene Expression-Based Classification of Non-Small Cell Lung Carcinomas and Survival Prediction. *PLoS One* 2010; 5: e10312.
5. Kuner R, Muley T, Meister M, et al. Global Gene Expression Analysis Reveals Specific Patterns of Cell Junctions in Non-Small Cell Lung Cancer Subtypes. *Lung Cancer* 2009; 63: 32-38.
6. Smith JJ, Deane NG, Wu F, et al. Experimentally Derived Metastasis Gene Expression Profile Predicts Recurrence and Death in Patients With Colon Cancer. *Gastroenterology* 2010; 138: 958-968.
7. Lu X, Lu X, Wang ZC, et al. Predicting Features of Breast Cancer With Gene Expression Patterns. *Breast Cancer Res Treat* 2008; 108: 191-201.
8. Chiang DY, Villanueva A, Hoshida Y, et al. Focal Gains of VEGFA and Molecular Classification of Hepatocellular Carcinoma. *Cancer Res* 2008; 68: 6779-6788.

9. Badea L, Herlea V, Dima SO, et al. Combined Gene Expression Analysis of Whole-Tissue and Microdissected Pancreatic Ductal Adenocarcinoma Identifies Genes Specifically Overexpressed in Tumor Epithelia. *Hepatogastroenterology* 2008; 55: 2016-2027.
10. Bild AH, Yao G, Chang JT, et al. Oncogenic Pathway Signatures in Human Cancers As a Guide to Targeted Therapies. *Nature* 2006; 439: 353-357.
11. Shedden K, Taylor JM, Enkemann SA, et al. Gene Expression-Based Survival Prediction in Lung Adenocarcinoma: a Multi-Site, Blinded Validation Study. *Nat Med* 2008; 14: 822-827.
12. Bryant CM, Albertus DL, Kim S, et al. Clinically Relevant Characterization of Lung Adenocarcinoma Subtypes Based on Cellular Pathways: an International Validation Study. *PLoS One* 2010; 5: e11712.
13. Dvorak A, Tilley AE, Shaykhiev R, et al. Do Airway Epithelium Air-Liquid Cultures Represent the in Vivo Airway Epithelium Transcriptome? *Am J Respir Cell Mol Biol* 2011; 44: 465-473.
14. Zhang L, Whitsett JA, Stripp BR. Regulation of Clara Cell Secretory Protein Gene Transcription by Thyroid Transcription Factor-1. *Biochim Biophys Acta* 1997; 1350: 359-367.
15. Wiedenmann B, Huttner WB. Synaptophysin and Chromogranins/Secretogranins-- Widespread Constituents of Distinct Types of Neuroendocrine Vesicles and New Tools in Tumor Diagnosis. *Virchows Arch B Cell Pathol Incl Mol Pathol* 1989; 58: 95-121.

16. Kalluri R, Weinberg RA. The Basics of Epithelial-Mesenchymal Transition. *J Clin Invest* 2009; 119: 1420-1428.

## **Supplemental Tables**

|                               |                                                                                                                  |
|-------------------------------|------------------------------------------------------------------------------------------------------------------|
| <b>Supplemental Table I</b>   | Lung Adenocarcinoma Patient Characteristics                                                                      |
| <b>Supplemental Table II</b>  | Gene Expression Analysis of Airway Basal Cell (BC) Signature in Lung Adenocarcinoma (adenoCa)                    |
| <b>Supplemental Table III</b> | Multivariate Cox Regression Analyses Including the Category Associated with the Airway Basal Cell (BC) Signature |

**Supplemental Table I. Lung Adenocarcinoma Patient Characteristics**

|                                 | <b>Primary cohort<br/>(Chitalle et al.)</b> | <b>Validation 1<br/>(Bild et al.)</b> | <b>Validation 2<br/>(Shedden et al.)</b> |
|---------------------------------|---------------------------------------------|---------------------------------------|------------------------------------------|
| Number of patients              | 182                                         | 58                                    | 327                                      |
| Age, mean $\pm$ S.D.            | 66.7 $\pm$ 10.7                             | N.A. <sup>2</sup>                     | 64.3 $\pm$ 10.2                          |
| Gender                          |                                             |                                       |                                          |
| Male                            | 78                                          | N.A.                                  | 180                                      |
| Female                          | 104                                         | N.A.                                  | 147                                      |
| Smoking history                 |                                             |                                       |                                          |
| Never                           | 35                                          | N.A.                                  | 28                                       |
| Ever                            | 146                                         | N.A.                                  | 210                                      |
| Unknown                         | 1                                           | N.A.                                  | 89                                       |
| Pathological stage <sup>1</sup> |                                             |                                       |                                          |
| I                               | 63                                          | N.A.                                  | 200                                      |
| II                              | 80                                          | N.A.                                  | 65                                       |
| III                             | 39                                          | N.A.                                  | 60                                       |
| Unknown                         | 0                                           | N.A.                                  | 2                                        |
| Median follow-up (month)        | 43.8                                        | 30.1                                  | 48.8                                     |
| Number of death                 | 90                                          | 32                                    | 191                                      |

<sup>1</sup> Pathological stage was based on 6<sup>th</sup> edition TNM staging.

<sup>2</sup> Abbreviations: N.A.: not available



**Supplemental Table II. Characterization of the 10-Gene Basal Cell (BC)-high Lung Adenocarcinoma (adenoCa) Signature**

| Gene name                                                             | Gene symbol | Functions                                        | Identification of BC-high adenoCa |                 |
|-----------------------------------------------------------------------|-------------|--------------------------------------------------|-----------------------------------|-----------------|
|                                                                       |             |                                                  | Sensitivity (%)                   | Specificity (%) |
| Phosphoglycerate mutase 1 (brain)                                     | PGAM1       | Enzyme in the glycolytic pathway                 | 93.5                              | 93.5            |
| Transmembrane protein 158 (gene/pseudogene)                           | TMEM158     | Ras-induced senescence                           | 91.3                              | 82.6            |
| Solute carrier family 16, member 3 (monocarboxylic acid transporters) | SLC16A3     | Lactic acid and pyruvate transport               | 89.1                              | 87              |
| Desmoglein 2                                                          | DSG2        | Cadherin cell adhesion                           | 89.1                              | 80.4            |
| Serine/threonine kinase receptor-associated protein                   | STRAP       | RNA splicing                                     | 89.1                              | 80.4            |
| Glutaredoxin 2                                                        | GLRX2       | Induction of apoptosis by oxidative stress       | 87                                | 89.1            |
| ArfGAP with FG repeats 1                                              | AGFG1       | RNA trafficking or localization                  | 87                                | 84.8            |
| Leucine rich repeat containing 42                                     | LRRC42      | (unknown)                                        | 87                                | 84.8            |
| Sec23 homolog A ( <i>S. cerevisiae</i> )                              | SEC23A      | Endoplasmic reticulum-Golgi protein trafficking  | 87                                | 84.8            |
| Procollagen-lysine, 2-oxoglutarate 5-dioxygenase 2                    | PLOD2       | Stability of intermolecular collagen cross-links | 87                                | 76.1            |

1 Based on the microarray analysis of the primary adenoCa data set.

Abbreviations: BC: basal cell, adenoCa: adenocarcinoma, AE: airway epithelium, N.S.: not significant.

**Supplemental Table III. Gene Expression Analysis of Airway Basal Cell (BC) Signature in Lung Adenocarcinoma (adenoCa)**

| Compared gene sets                                            | Cohorts                                           | p value (t-test) |             |
|---------------------------------------------------------------|---------------------------------------------------|------------------|-------------|
|                                                               |                                                   | < 0.5x median    | > 2x median |
| Airway BC signature<br>vs non-BC signature                    | 1) Primary cohort<br>(n=182, Chitale et al)       |                  |             |
|                                                               | 2) Validation cohort 1<br>(n=58, Bild et al)      | p<0.002          | p<0.0006    |
|                                                               | 3) Validation cohort 2<br>(n=327, Shedden et al.) |                  |             |
| Airway BC signature<br>vs randomly selected<br>gene sets 1-50 | Airway BC signature                               |                  |             |
|                                                               | 1) Primary cohort<br>(n=182, Chitale et al)       |                  |             |
|                                                               | 2) Validation cohort 1<br>(n=58, Bild et al)      |                  |             |
|                                                               | 3) Validation cohort 2<br>(n=327, Shedden et al.) | p<0.0000005      | p<0.02      |
|                                                               | Randomly selected gene sets 1-50                  |                  |             |
|                                                               | 1) Primary cohort<br>(n=182, Chitale et al)       |                  |             |

## Supplemental Figure Legends

**Supplemental Figure 1.** Diagram representing experimental flow of the study.

**Supplemental Figure 2.** Correlation between BC index and NK2 homeobox 1 (NKX2-1) expression in primary lung adenocarcinoma cohort (n=182). Y-axis - BC index; x-axis – normalized NKX2-1 expression levels; Pearson correlation (r) and p value are indicated.

**Supplemental Figure 3.** Immunohistological analysis of BC-high lung adenoCa, BC-low lung adenoCa, lung squamous cell carcinoma (SqCa) and normal lung tissue for the expression of the thyroid transcription factor-1 (TTF-1) and tumor protein TP63. Representative BC-high and BC-low adenoCa biopsy samples were selected based on the gene expression data as described in Methods; scale bar - 50µm for original magnification x60 for normal lung tissue, 20 µm for original magnification x20 for lung cancer tissue.

**Supplemental Figure 4.** Examples of expression of small cell lung carcinoma-related genes in BC-high adenoCa compared to BC-low adenoCa: tumor protein p53 (TP53); retinoblastoma 1 (RB1), V-myc myelocytomatosis viral oncogene homolog 1, lung carcinoma derived (avian) (MYCL1, also known as L-MYC). In all panels, log<sub>2</sub>-transformed normalized gene expression levels based on the microarray analysis are shown; n=46 in each group. Outliers are indicated on the basis of interquartile range (IQR); ° -1.5 x IQR to 3 x IQR, \* - more or less than 3 x IQR.

**Supplemental Figure 5.** Disease free survival after surgery of BC-high adenoCa (red) vs BC-low adenoCa (blue) in primary lung adenocarcinoma cohort (n=182). p values were determined by the log-rank test; the number of individuals in each group are indicated.

**Supplemental Figure 6.** Survival analysis of lung squamous cell carcinoma (SqCa) patients based on the BC signature expression in the lung cancer cohort (Bild et al.) compared to the adenoCa. **A.** Categorization of BC-high (red) and BC-low (blue) patients with adenocarcinoma (adenoCa) and SqCa. SqCa samples were categorized based on the adenoCa cohort, in which

BC-high and BC-low samples were determined as described in Methods. **B.** Overall survival of BC-high SqCa (red) *vs* BC-low SqCa patients (blue) **C.** Overall survival of BC-high adenoCa (red), BC-low adenoCa and SqCa. p values were determined by the log-rank test; the number of individuals in each group are indicated.

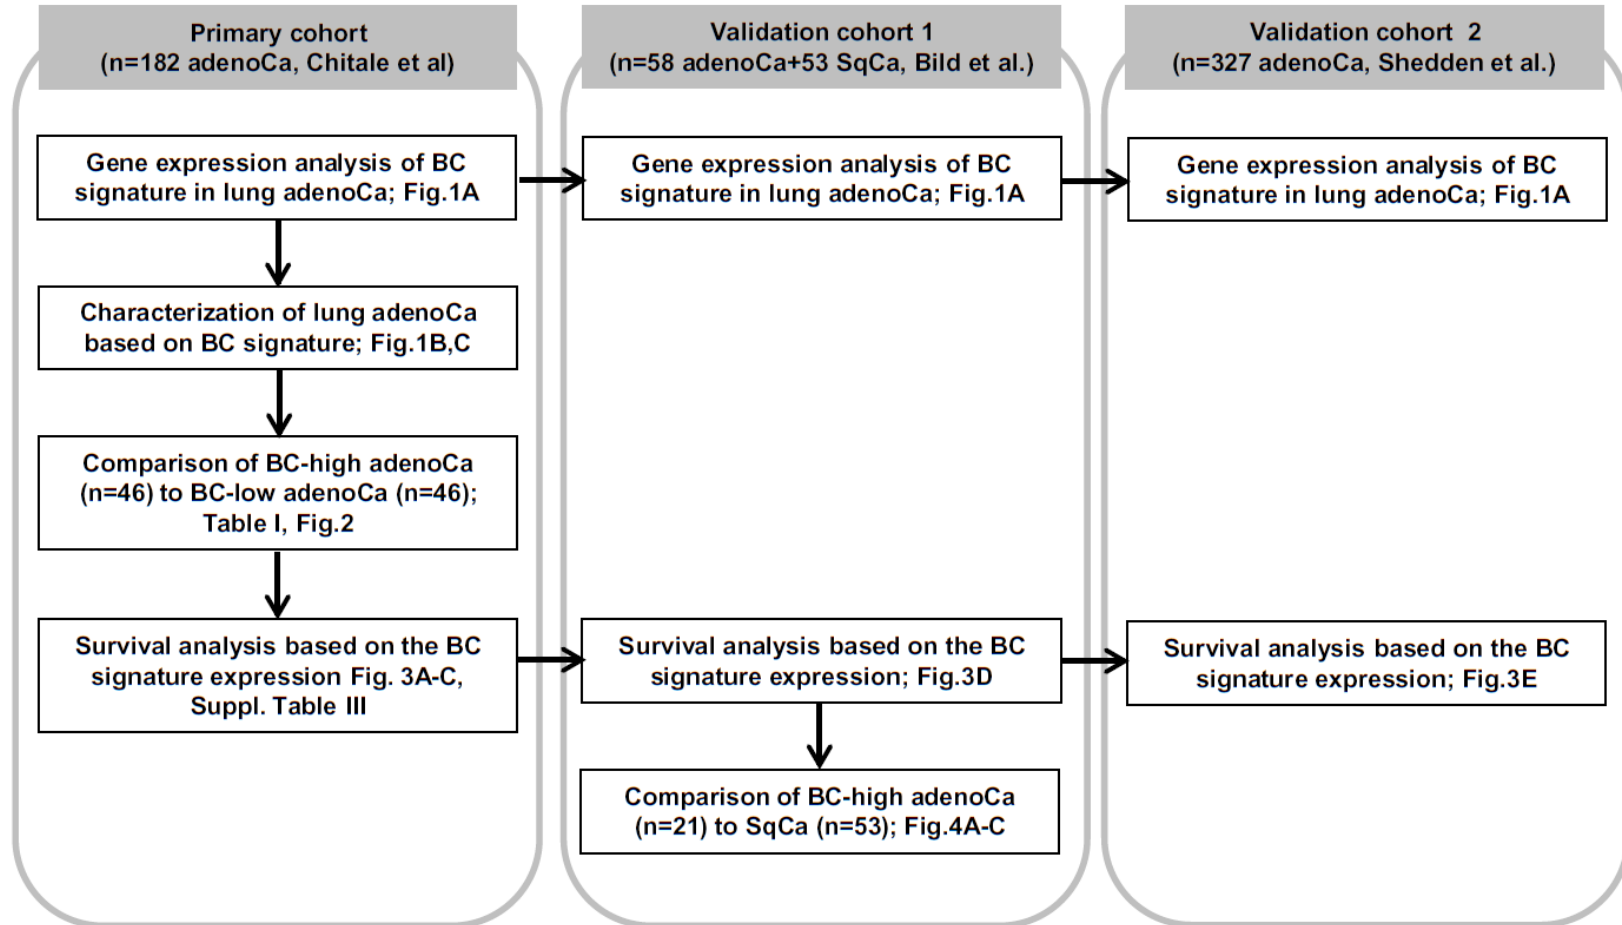

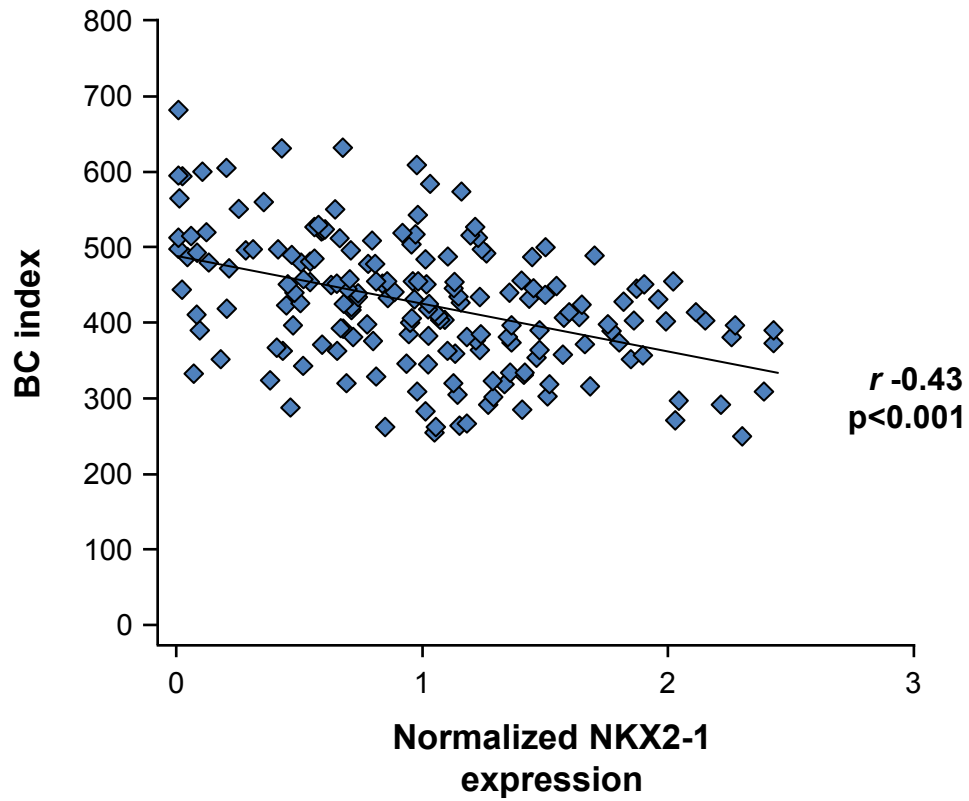

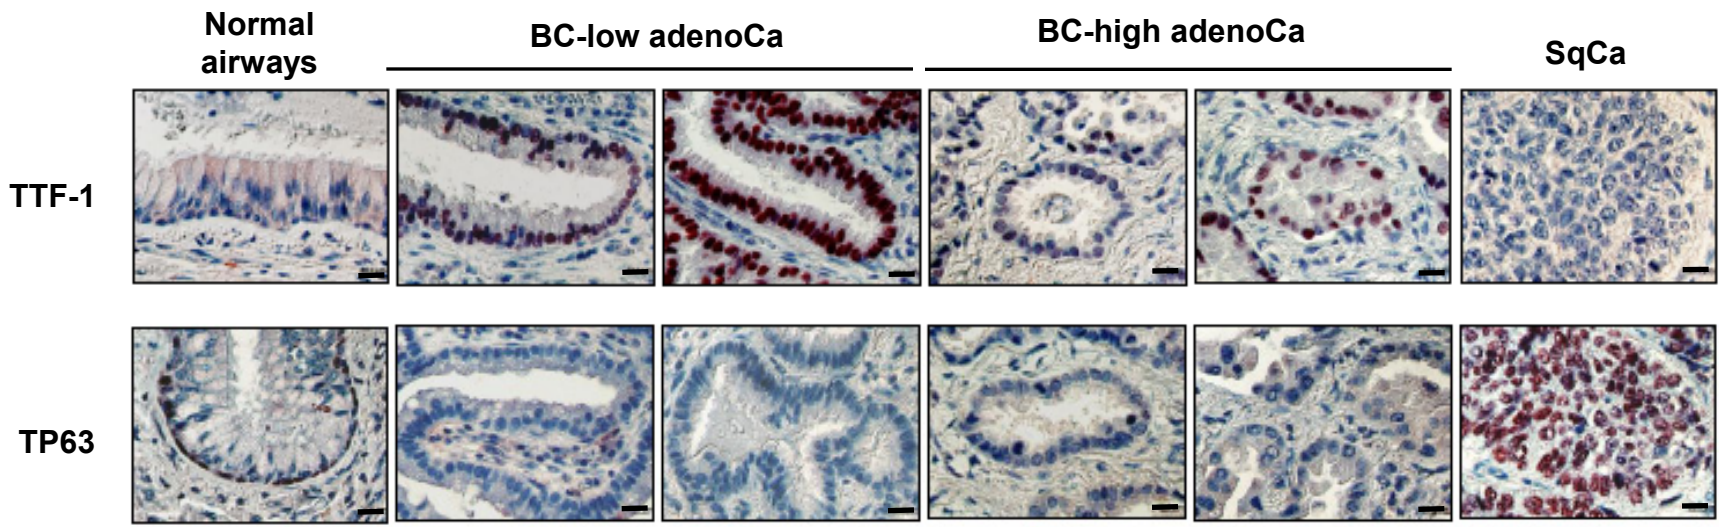

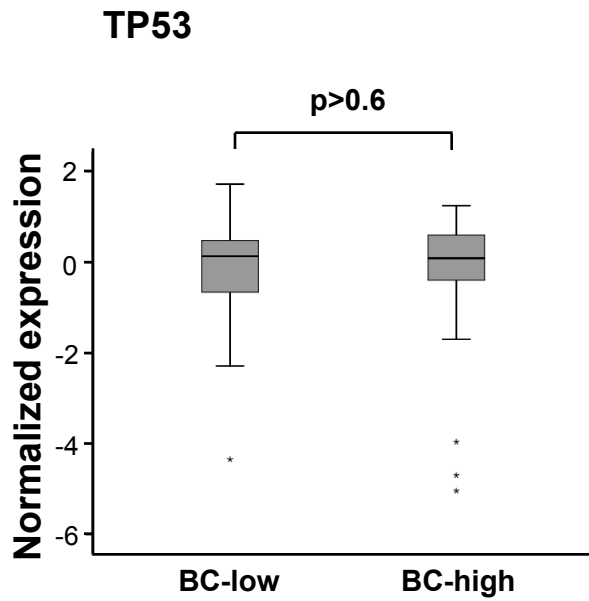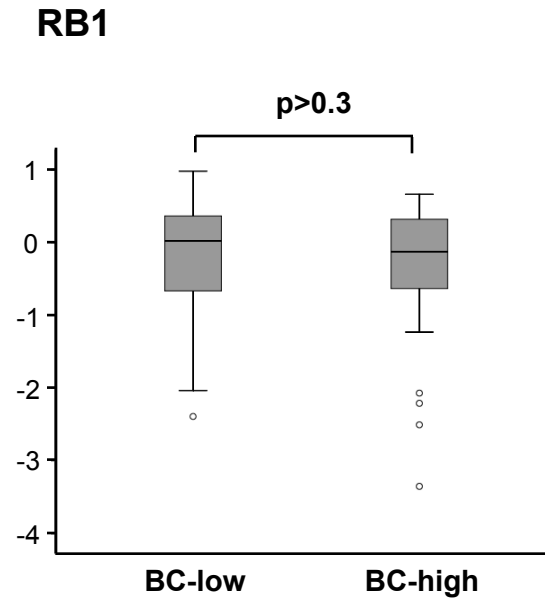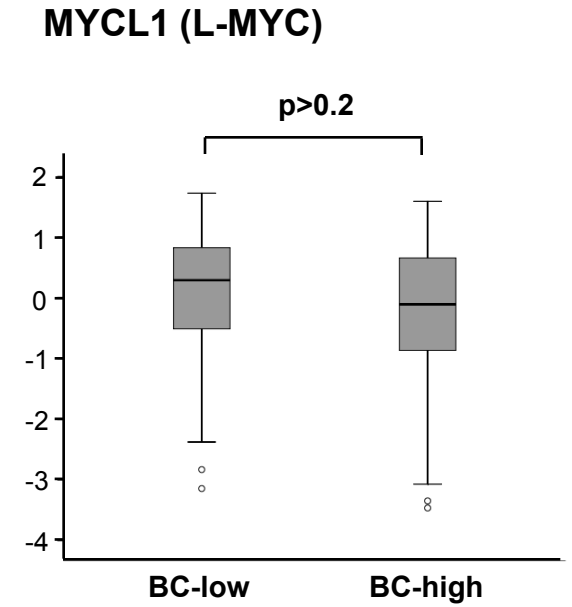



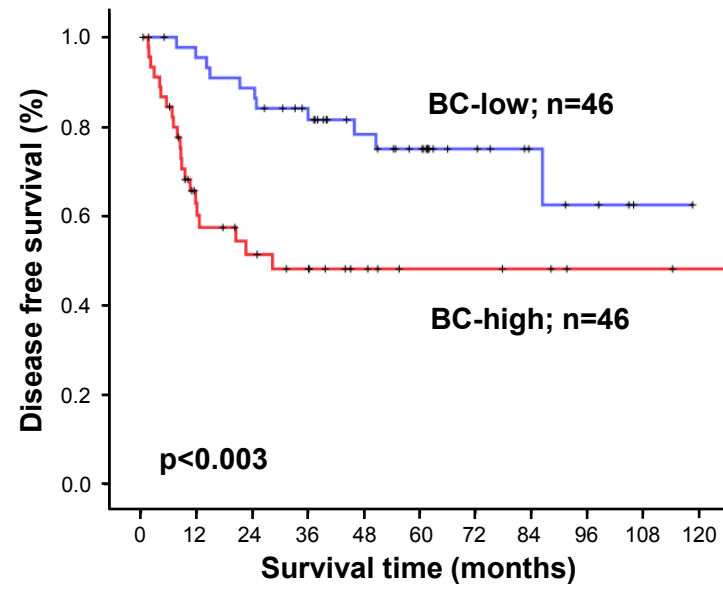

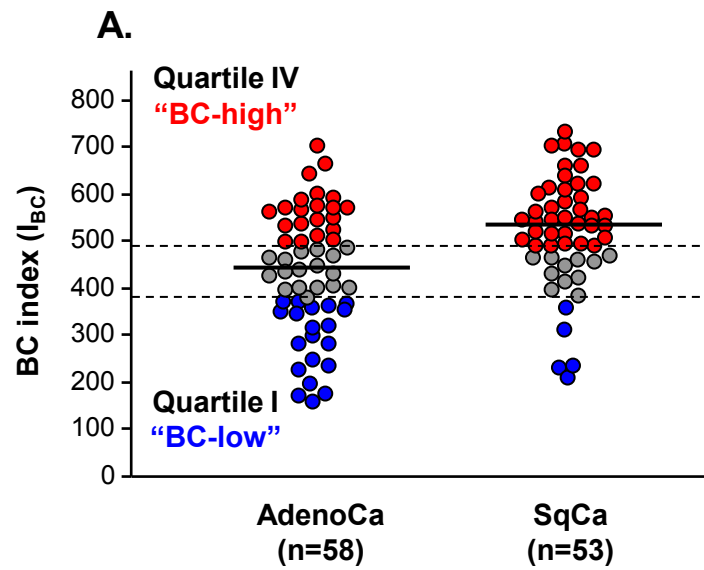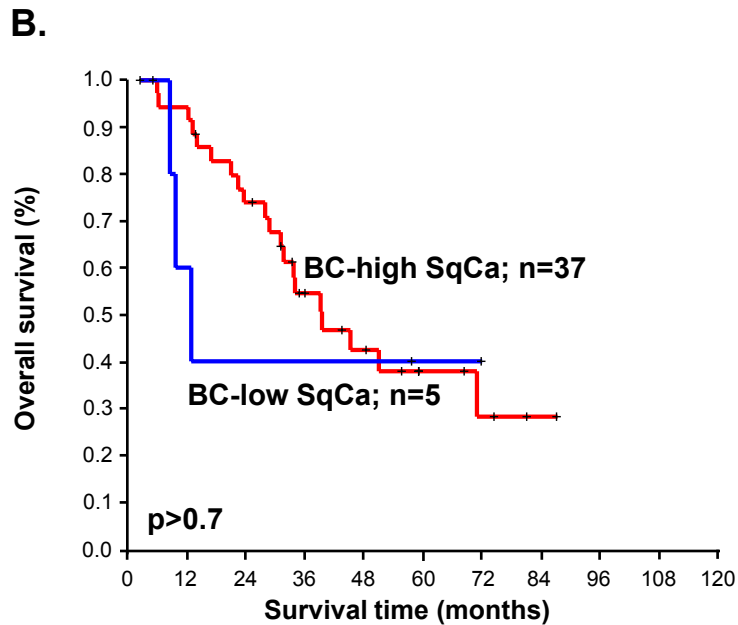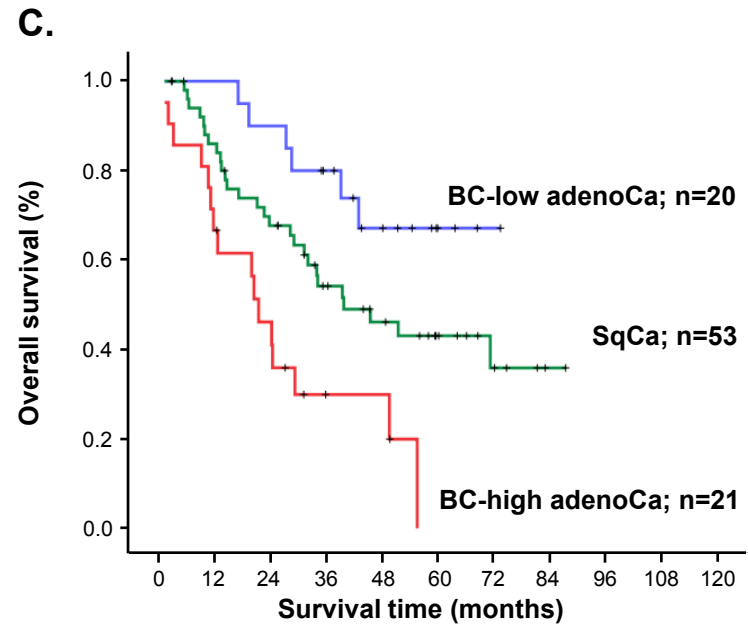

BC-high adenoCa vs BC-low adenoCa;  $p < 0.001$   
BC-high adenoCa vs SqCa;  $p < 0.008$   
BC-low adenoCa vs SqCa;  $p > 0.06$

**Supplemental Gene List I. Airway Basal Cell Signature Genes Analyzed**

| <b>Probe ID</b> | <b>Gene name</b>                                                                             | <b>Median of normalized expression levels in lung adenoCa</b> |                 |
|-----------------|----------------------------------------------------------------------------------------------|---------------------------------------------------------------|-----------------|
| 200650_s_at     | lactate dehydrogenase A                                                                      | 57.01                                                         | Above 2x median |
| 201666_at       | TIMP metalloproteinase inhibitor 1                                                           | 51.60                                                         | Above 2x median |
| 200872_at       | S100 calcium binding protein A10                                                             | 44.97                                                         | Above 2x median |
| 211945_s_at     | integrin, beta 1 (fibronectin receptor, beta polypeptide, antigen CD29 includes MDF2, MSK12) | 36.19                                                         | Above 2x median |
| 217466_x_at     | ribosomal protein S2                                                                         | 32.40                                                         | Above 2x median |
| 211936_at       | heat shock 70kDa protein 5 (glucose-regulated protein, 78kDa)                                | 30.89                                                         | Above 2x median |
| 217963_s_at     | nerve growth factor receptor (TNFRSF16) associated protein 1                                 | 29.77                                                         | Above 2x median |
| 208679_s_at     | actin related protein 2/3 complex, subunit 2, 34kDa                                          | 29.23                                                         | Above 2x median |
| 209386_at       | transmembrane 4 L six family member 1                                                        | 28.61                                                         | Above 2x median |
| 211597_s_at     | HOP homeobox                                                                                 | 27.42                                                         | Above 2x median |
| 201215_at       | plastin 3                                                                                    | 27.17                                                         | Above 2x median |
| 200634_at       | profilin 1                                                                                   | 27.14                                                         | Above 2x median |
| 212185_x_at     | metallothionein 2A                                                                           | 24.94                                                         | Above 2x median |
| 201105_at       | lectin, galactoside-binding, soluble, 1                                                      | 24.82                                                         | Above 2x median |
| 217294_s_at     | enolase 1, (alpha)                                                                           | 23.20                                                         | Above 2x median |
| 200989_at       | hypoxia inducible factor 1, alpha subunit (basic helix-loop-helix transcription factor)      | 22.58                                                         | Above 2x median |
| 200700_s_at     | KDEL (Lys-Asp-Glu-Leu) endoplasmic reticulum protein retention receptor 2                    | 20.86                                                         | Above 2x median |
| 201268_at       | NME1-NME2 readthrough / non-metastatic cells 2, protein (NM23B) expressed in                 | 20.20                                                         | Above 2x median |
| 200600_at       | moesin                                                                                       | 19.30                                                         | Above 2x median |
| 200886_s_at     | phosphoglycerate mutase 1 (brain)                                                            | 19.10                                                         | Above 2x median |
| 201818_at       | lysophosphatidylcholine acyltransferase 1                                                    | 18.96                                                         | Above 2x median |
| 211980_at       | collagen, type IV, alpha 1                                                                   | 18.70                                                         | Above 2x median |
| 222229_x_at     | ribosomal protein L26                                                                        | 18.66                                                         | Above 2x median |
| 200779_at       | activating transcription factor 4 (tax-responsive enhancer element B67)                      | 18.48                                                         | Above 2x median |
| 200625_s_at     | CAP, adenylate cyclase-associated protein 1 (yeast)                                          | 17.90                                                         | Above 2x median |
| 208700_s_at     | transketolase                                                                                | 17.61                                                         | Above 2x median |
| 214853_s_at     | SHC (Src homology 2 domain containing) transforming protein 1                                | 17.28                                                         | Above 2x median |
| 201069_at       | matrix metalloproteinase 2 (gelatinase A, 72kDa gelatinase, 72kDa type IV collagenase)       | 17.09                                                         | Above 2x median |

**Supplemental Gene List I. Airway Basal Cell Signature Genes Analyzed (cont. page 2)**

| <b>Probe ID</b> | <b>Gene name</b>                                            | <b>Median of normalized expression levels in lung adenoCa</b> |                 |
|-----------------|-------------------------------------------------------------|---------------------------------------------------------------|-----------------|
| 200632_s_at     | N-myc downstream regulated 1                                | 16.88                                                         | Above 2x median |
| 203108_at       | G protein-coupled receptor, family C, group 5, member A     | 16.47                                                         | Above 2x median |
| 210986_s_at     | tropomyosin 1 (alpha)                                       | 16.04                                                         | Above 2x median |
| 218205_s_at     | MAP kinase interacting serine/threonine kinase 2            | 15.99                                                         | Above 2x median |
| 208540_x_at     | S100 calcium binding protein A11                            | 15.83                                                         | Above 2x median |
| 209373_at       | mal, T-cell differentiation protein-like                    | 15.08                                                         | Above 2x median |
| 220924_s_at     | solute carrier family 38, member 2                          | 14.79                                                         | Above 2x median |
| 211964_at       | collagen, type IV, alpha 2                                  | 14.78                                                         | Above 2x median |
| 208581_x_at     | metallothionein 1X                                          | 14.74                                                         | Above 2x median |
| 212859_x_at     | metallothionein 1E                                          | 14.53                                                         | Above 2x median |
| 200931_s_at     | vinculin                                                    | 14.42                                                         | Above 2x median |
| 216241_s_at     | transcription elongation factor A (SII), 1                  | 14.25                                                         | Above 2x median |
| 209154_at       | Tax1 (human T-cell leukemia virus type I) binding protein 3 | 13.96                                                         | Above 2x median |
| 216640_s_at     | protein disulfide isomerase family A, member 6              | 13.95                                                         | Above 2x median |
| 201150_s_at     | TIMP metalloproteinase inhibitor 3                          | 13.42                                                         | Above 2x median |
| 208892_s_at     | dual specificity phosphatase 6                              | 13.23                                                         | Above 2x median |
| 200999_s_at     | cytoskeleton-associated protein 4                           | 13.15                                                         | Above 2x median |
| 202442_at       | adaptor-related protein complex 3, sigma 1 subunit          | 13.14                                                         | Above 2x median |
| 221923_s_at     | nucleophosmin (nucleolar phosphoprotein B23, numatrin)      | 13.07                                                         | Above 2x median |
| 220755_s_at     | chromosome 6 open reading frame 48                          | 12.97                                                         | Above 2x median |
| 209016_s_at     | keratin 7                                                   | 12.68                                                         | Above 2x median |
| 201286_at       | syndecan 1                                                  | 12.62                                                         | Above 2x median |
| 201416_at       | SRY (sex determining region Y)-box 4                        | 12.56                                                         | Above 2x median |
| 201506_at       | transforming growth factor, beta-induced, 68kDa             | 12.40                                                         | Above 2x median |
| 203484_at       | Sec61 gamma subunit                                         | 12.27                                                         | Above 2x median |
| 207738_s_at     | NCK-associated protein 1                                    | 12.25                                                         | Above 2x median |
| 210512_s_at     | vascular endothelial growth factor A                        | 12.16                                                         | Above 2x median |
| 208152_s_at     | DEAD (Asp-Glu-Ala-Asp) box polypeptide 21                   | 12.14                                                         | Above 2x median |
| 200788_s_at     | phosphoprotein enriched in astrocytes 15                    | 12.04                                                         | Above 2x median |
| 201631_s_at     | immediate early response 3                                  | 12.02                                                         | Above 2x median |
| 219293_s_at     | Obg-like ATPase 1                                           | 11.69                                                         | Above 2x median |
| 208636_at       | actinin, alpha 1                                            | 11.60                                                         | Above 2x median |
| 214091_s_at     | glutathione peroxidase 3 (plasma)                           | 11.51                                                         | Above 2x median |
| 200870_at       | serine/threonine kinase receptor associated protein         | 11.43                                                         | Above 2x median |
| 201577_at       | non-metastatic cells 1, protein (NM23A) expressed in        | 11.38                                                         | Above 2x median |
| 200790_at       | ornithine decarboxylase 1                                   | 11.21                                                         | Above 2x median |
| 200743_s_at     | tripeptidyl peptidase I                                     | 10.95                                                         | Above 2x median |

**Supplemental Gene List I. Airway Basal Cell Signature Genes Analyzed (cont. page 3)**

| <b>Probe ID</b> | <b>Gene name</b>                                                                                    | <b>Median of normalized expression levels in lung adenoCa</b> |                 |
|-----------------|-----------------------------------------------------------------------------------------------------|---------------------------------------------------------------|-----------------|
| 201828_x_at     | family with sequence similarity 127, member A                                                       | 10.91                                                         | Above 2x median |
| 208726_s_at     | eukaryotic translation initiation factor 2, subunit 2 beta, 38kDa                                   | 10.69                                                         | Above 2x median |
| 208693_s_at     | glycyl-tRNA synthetase                                                                              | 10.49                                                         | Above 2x median |
| 218084_x_at     | FXFD domain containing ion transport regulator 5                                                    | 10.42                                                         | Above 2x median |
| 200606_at       | desmoplakin                                                                                         | 10.38                                                         | Above 2x median |
| 208801_at       | signal recognition particle 72kDa                                                                   | 10.01                                                         | Above 2x median |
| 222231_s_at     | leucine rich repeat containing 59                                                                   | 9.96                                                          | Above 2x median |
| 208886_at       | H1 histone family, member 0                                                                         | 9.95                                                          | Above 2x median |
| 200885_at       | ras homolog gene family, member C                                                                   | 9.91                                                          | Above 2x median |
| 213404_s_at     | Ras homolog enriched in brain                                                                       | 9.87                                                          | Above 2x median |
| 211284_s_at     | granulin                                                                                            | 9.85                                                          | Above 2x median |
| 208161_s_at     | ATP-binding cassette, sub-family C (CFTR/MRP), member 3                                             | 9.71                                                          | Above 2x median |
| 212473_s_at     | microtubule associated monooxygenase, calponin and LIM domain containing 2                          | 9.63                                                          | Above 2x median |
| 200771_at       | laminin, gamma 1 (formerly LAMB2)                                                                   | 9.60                                                          | Above 2x median |
| 201587_s_at     | interleukin-1 receptor-associated kinase 1                                                          | 9.54                                                          | Above 2x median |
| 200853_at       | H2A histone family, member Z                                                                        | 9.54                                                          | Above 2x median |
| 201560_at       | chloride intracellular channel 4                                                                    | 9.51                                                          | Above 2x median |
| 201015_s_at     | junction plakoglobin                                                                                | 9.50                                                          | Above 2x median |
| 213603_s_at     | ras-related C3 botulinum toxin substrate 2 (rho family, small GTP binding protein Rac2)             | 9.42                                                          | Above 2x median |
| 211456_x_at     | metallothionein 1 pseudogene 2                                                                      | 9.37                                                          | Above 2x median |
| 202231_at       | eukaryotic translation initiation factor 3, subunit M                                               | 9.30                                                          | Above 2x median |
| 212265_at       | quaking homolog, KH domain RNA binding (mouse)                                                      | 9.14                                                          | Above 2x median |
| 201667_at       | gap junction protein, alpha 1, 43kDa                                                                | 9.06                                                          | Above 2x median |
| 221739_at       | chromosome 19 open reading frame 10                                                                 | 9.06                                                          | Above 2x median |
| 217938_s_at     | potassium channel modulatory factor 1                                                               | 9.02                                                          | Above 2x median |
| 202720_at       | testis derived transcript (3 LIM domains)                                                           | 9.02                                                          | Above 2x median |
| 217975_at       | WW domain binding protein 5                                                                         | 8.94                                                          | Above 2x median |
| 201189_s_at     | inositol 1,4,5-triphosphate receptor, type 3                                                        | 8.81                                                          | Above 2x median |
| 201088_at       | karyopherin alpha 2 (RAG cohort 1, importin alpha 1)                                                | 8.75                                                          | Above 2x median |
| 207714_s_at     | serpin peptidase inhibitor, clade H (heat shock protein 47), member 1, (collagen binding protein 1) | 8.63                                                          | Above 2x median |
| 205569_at       | lysosomal-associated membrane protein 3                                                             | 8.59                                                          | Above 2x median |
| 216396_s_at     | etoposide induced 2.4 mRNA                                                                          | 8.58                                                          | Above 2x median |
| 212995_x_at     | mitotic spindle organizing protein 2B                                                               | 8.54                                                          | Above 2x median |

**Supplemental Gene List I. Airway Basal Cell Signature Genes Analyzed (cont. page 4)**

| <b>Probe ID</b> | <b>Gene name</b>                                                      | <b>Median of normalized expression levels in lung adenoCa</b> |                 |
|-----------------|-----------------------------------------------------------------------|---------------------------------------------------------------|-----------------|
| 217995_at       | sulfide quinone reductase-like (yeast)                                | 8.47                                                          | Above 2x median |
| 201064_s_at     | poly(A) binding protein, cytoplasmic 4 (inducible form)               | 8.46                                                          | Above 2x median |
| 210406_s_at     | RAB6A, member RAS oncogene family / RAB6C, member RAS oncogene family | 8.37                                                          | Above 2x median |
| 203744_at       | high-mobility group box 3                                             | 8.32                                                          | Above 2x median |
| 201300_s_at     | prion protein                                                         | 8.22                                                          | Above 2x median |
| 203510_at       | met proto-oncogene (hepatocyte growth factor receptor)                | 8.14                                                          | Above 2x median |
| 206461_x_at     | metallothionein 1H                                                    | 8.04                                                          | Above 2x median |
| 216449_x_at     | heat shock protein 90kDa beta (Grp94), member 1                       | 7.99                                                          | Above 2x median |
| 212610_at       | protein tyrosine phosphatase, non-receptor type 11                    | 7.92                                                          | Above 2x median |
| 218718_at       | platelet derived growth factor C                                      | 7.92                                                          | Above 2x median |
| 202525_at       | protease, serine, 8                                                   | 7.78                                                          | Above 2x median |
| 221269_s_at     | SH3 domain binding glutamic acid-rich protein like 3                  | 7.78                                                          | Above 2x median |
| 201921_at       | guanine nucleotide binding protein (G protein), gamma 10              | 7.60                                                          | Above 2x median |
| 201319_at       | myosin, light chain 12A, regulatory, non-sarcomeric                   | 7.58                                                          | Above 2x median |
| 212086_x_at     | lamin A/C                                                             | 7.58                                                          | Above 2x median |
| 200802_at       | seryl-tRNA synthetase                                                 | 7.56                                                          | Above 2x median |
| 202655_at       | mesencephalic astrocyte-derived neurotrophic factor                   | 7.52                                                          | Above 2x median |
| 203476_at       | trophoblast glycoprotein                                              | 7.43                                                          | Above 2x median |
| 200832_s_at     | stearoyl-CoA desaturase (delta-9-desaturase)                          | 7.22                                                          | Above 2x median |
| 218618_s_at     | fibronectin type III domain containing 3B                             | 7.20                                                          | Above 2x median |
| 217901_at       | desmoglein 2                                                          | 7.18                                                          | Above 2x median |
| 213923_at       | RAP2B, member of RAS oncogene family                                  | 7.13                                                          | Above 2x median |
| 201272_at       | aldo-keto reductase family 1, member B1 (aldose reductase)            | 7.10                                                          | Above 2x median |
| 217730_at       | transmembrane BAX inhibitor motif containing 1                        | 7.06                                                          | Above 2x median |
| 209786_at       | high mobility group nucleosomal binding domain 4                      | 6.93                                                          | Above 2x median |
| 218368_s_at     | tumor necrosis factor receptor superfamily, member 12A                | 6.93                                                          | Above 2x median |
| 202381_at       | ADAM metalloproteinase domain 9                                       | 6.86                                                          | Above 2x median |
| 201540_at       | four and a half LIM domains 1                                         | 6.85                                                          | Above 2x median |
| 201655_s_at     | heparan sulfate proteoglycan 2                                        | 6.82                                                          | Above 2x median |
| 201850_at       | capping protein (actin filament), gelsolin-like                       | 6.80                                                          | Above 2x median |
| 208727_s_at     | cell division cycle 42 (GTP binding protein, 25kDa)                   | 6.78                                                          | Above 2x median |
| 216336_x_at     | hypothetical protein LOC100505584 / metallothionein 1E                | 6.76                                                          | Above 2x median |
| 204745_x_at     | metallothionein 1G                                                    | 6.71                                                          | Above 2x median |
| 32811_at        | myosin IC                                                             | 6.70                                                          | Above 2x median |
| 201144_s_at     | eukaryotic translation initiation factor 2, subunit 1 alpha, 35kDa    | 6.64                                                          | Above 2x median |

**Supplemental Gene List I. Airway Basal Cell Signature Genes Analyzed (cont. page 5)**

| <b>Probe ID</b> | <b>Gene name</b>                                                                                     | <b>Median of normalized expression levels in lung adenoCa</b> |                 |
|-----------------|------------------------------------------------------------------------------------------------------|---------------------------------------------------------------|-----------------|
| 201393_s_at     | insulin-like growth factor 2 receptor                                                                | 6.63                                                          | Above 2x median |
| 216505_x_at     | ribosomal protein S10                                                                                | 6.48                                                          | Above 2x median |
| 212048_s_at     | tyrosyl-tRNA synthetase                                                                              | 6.47                                                          | Above 2x median |
| 213746_s_at     | filamin A, alpha                                                                                     | 6.30                                                          | Above 2x median |
| 209181_s_at     | Rab geranylgeranyltransferase, beta subunit                                                          | 6.29                                                          | Above 2x median |
| 208786_s_at     | microtubule-associated protein 1 light chain 3 beta                                                  | 6.20                                                          | Above 2x median |
| 213812_s_at     | calcium/calmodulin-dependent protein kinase kinase 2, beta                                           | 6.19                                                          | Above 2x median |
| 201963_at       | acyl-CoA synthetase long-chain family member 1                                                       | 6.18                                                          | Above 2x median |
| 204528_s_at     | nucleosome assembly protein 1-like 1                                                                 | 6.14                                                          | Above 2x median |
| 206100_at       | carboxypeptidase M                                                                                   | 6.10                                                          | Above 2x median |
| 208789_at       | polymerase I and transcript release factor                                                           | 6.09                                                          | Above 2x median |
| 200744_s_at     | guanine nucleotide binding protein (G protein), beta polypeptide 1                                   | 6.09                                                          | Above 2x median |
| 209190_s_at     | diaphanous homolog 1 (Drosophila)                                                                    | 6.07                                                          | Above 2x median |
| 222108_at       | adhesion molecule with Ig-like domain 2                                                              | 6.06                                                          | Above 2x median |
| 219032_x_at     | opsin 3                                                                                              | 6.04                                                          | Above 2x median |
| 218677_at       | S100 calcium binding protein A14                                                                     | 6.03                                                          | Above 2x median |
| 212698_s_at     | septin 10                                                                                            | 5.98                                                          | Above 2x median |
| 201849_at       | BCL2/adenovirus E1B 19kDa interacting protein 3                                                      | 5.96                                                          | Above 2x median |
| 218336_at       | prefoldin subunit 2                                                                                  | 5.94                                                          | Above 2x median |
| 212012_at       | peroxidasin homolog (Drosophila)                                                                     | 5.88                                                          | Above 2x median |
| 203065_s_at     | caveolin 1, caveolae protein, 22kDa                                                                  | 5.73                                                          | Above 2x median |
| 217755_at       | hematological and neurological expressed 1                                                           | 5.73                                                          | Above 2x median |
| 208074_s_at     | adaptor-related protein complex 2, sigma 1 subunit                                                   | 5.72                                                          | Above 2x median |
| 202345_s_at     | fatty acid binding protein 5 (psoriasis-associated)                                                  | 5.71                                                          | Above 2x median |
| 202670_at       | mitogen-activated protein kinase kinase 1                                                            | 5.71                                                          | Above 2x median |
| 202006_at       | protein tyrosine phosphatase, non-receptor type 12                                                   | 5.69                                                          | Above 2x median |
| 221676_s_at     | coronin, actin binding protein, 1C                                                                   | 5.69                                                          | Above 2x median |
| 221830_at       | RAP2A, member of RAS oncogene family                                                                 | 5.68                                                          | Above 2x median |
| 218611_at       | immediate early response 5                                                                           | 5.67                                                          | Above 2x median |
| 201976_s_at     | myosin X                                                                                             | 5.65                                                          | Above 2x median |
| 201013_s_at     | phosphoribosylaminoimidazole carboxylase, phosphoribosylaminoimidazole succinocarboxamide synthetase | 5.65                                                          | Above 2x median |
| 207121_s_at     | mitogen-activated protein kinase 6                                                                   | 5.63                                                          | Above 2x median |
| 209210_s_at     | fermitin family member 2                                                                             | 5.62                                                          | Above 2x median |
| 35820_at        | GM2 ganglioside activator                                                                            | 5.62                                                          | Above 2x median |

**Supplemental Gene List I. Airway Basal Cell Signature Genes Analyzed (cont. page 6)**

| <b>Probe ID</b> | <b>Gene name</b>                                                                                     | <b>Median of normalized expression levels in lung adenoCa</b> |                 |
|-----------------|------------------------------------------------------------------------------------------------------|---------------------------------------------------------------|-----------------|
| 208961_s_at     | Kruppel-like factor 6                                                                                | 5.55                                                          | Above 2x median |
| 212242_at       | tubulin, alpha 4a                                                                                    | 5.50                                                          | Above 2x median |
| 201761_at       | methylenetetrahydrofolate dehydrogenase (NADP+ dependent) 2, methenyltetrahydrofolate cyclohydrolase | 5.50                                                          | Above 2x median |
| 217738_at       | Nicotinamide phosphoribosyltransferase                                                               | 5.48                                                          | Above 2x median |
| 201324_at       | epithelial membrane protein 1                                                                        | 5.47                                                          | Above 2x median |
| 209270_at       | laminin, beta 3                                                                                      | 5.42                                                          | Above 2x median |
| 212640_at       | protein tyrosine phosphatase-like (proline instead of catalytic arginine), member b                  | 5.40                                                          | Above 2x median |
| 212024_x_at     | flightless I homolog (Drosophila)                                                                    | 5.40                                                          | Above 2x median |
| 203786_s_at     | tumor protein D52-like 1                                                                             | 5.37                                                          | Above 2x median |
| 215780_s_at     | SET translocation (myeloid leukemia-associated) pseudogene / SET nuclear oncogene                    | 5.32                                                          | Above 2x median |
| 218728_s_at     | cornichon homolog 4 (Drosophila)                                                                     | 5.31                                                          | Above 2x median |
| 201579_at       | FAT tumor suppressor homolog 1 (Drosophila)                                                          | 5.28                                                          | Above 2x median |
| 209080_x_at     | glutaredoxin 3                                                                                       | 5.25                                                          | Above 2x median |
| 203535_at       | S100 calcium binding protein A9                                                                      | 5.24                                                          | Above 2x median |
| 221577_x_at     | growth differentiation factor 15                                                                     | 5.24                                                          | Above 2x median |
| 202201_at       | biliverdin reductase B (flavin reductase (NADPH))                                                    | 5.24                                                          | Above 2x median |
| 209146_at       | sterol-C4-methyl oxidase-like                                                                        | 5.23                                                          | Above 2x median |
| 210105_s_at     | FYN oncogene related to SRC, FGR, YES                                                                | 5.14                                                          | Above 2x median |
| 200889_s_at     | signal sequence receptor, alpha                                                                      | 5.13                                                          | Above 2x median |
| 212250_at       | metadherin                                                                                           | 5.12                                                          | Above 2x median |
| 200733_s_at     | protein tyrosine phosphatase type IVA, member 1                                                      | 5.09                                                          | Above 2x median |
| 221827_at       | RanBP-type and C3HC4-type zinc finger containing 1                                                   | 5.09                                                          | Above 2x median |
| 209803_s_at     | pleckstrin homology-like domain, family A, member 2                                                  | 5.09                                                          | Above 2x median |
| 37408_at        | mannose receptor, C type 2                                                                           | 5.08                                                          | Above 2x median |
| 202949_s_at     | four and a half LIM domains 2                                                                        | 5.02                                                          | Above 2x median |
| 212566_at       | microtubule-associated protein 4                                                                     | 5.02                                                          | Above 2x median |
| 203323_at       | caveolin 2                                                                                           | 4.97                                                          | Above 2x median |
| 212680_x_at     | protein phosphatase 1, regulatory (inhibitor) subunit 14B                                            | 4.96                                                          | Above 2x median |
| 204135_at       | filamin A interacting protein 1-like                                                                 | 4.93                                                          | Above 2x median |
| 206074_s_at     | high mobility group AT-hook 1                                                                        | 4.93                                                          | Above 2x median |
| 205263_at       | B-cell CLL/lymphoma 10                                                                               | 4.88                                                          | Above 2x median |
| 221059_s_at     | coactosin-like 1 (Dictyostelium)                                                                     | 4.86                                                          | Above 2x median |
| 218309_at       | calcium/calmodulin-dependent protein kinase II inhibitor 1                                           | 4.80                                                          | Above 2x median |
| 201853_s_at     | cell division cycle 25 homolog B (S. pombe)                                                          | 4.79                                                          | Above 2x median |
| 218237_s_at     | solute carrier family 38, member 1                                                                   | 4.78                                                          | Above 2x median |



**Supplemental Gene List I. Airway Basal Cell Signature Genes Analyzed (cont. page 7)**

| <b>Probe ID</b> | <b>Gene name</b>                                                                                                     | <b>Median of normalized expression levels in lung adenoCa</b> |                 |
|-----------------|----------------------------------------------------------------------------------------------------------------------|---------------------------------------------------------------|-----------------|
| 217776_at       | retinol dehydrogenase 11 (all-trans/9-cis/11-cis)                                                                    | 4.77                                                          | Above 2x median |
| 201110_s_at     | thrombospondin 1                                                                                                     | 4.71                                                          | Above 2x median |
| 212846_at       | ribosomal RNA processing 1 homolog B (S. cerevisiae)                                                                 | 4.70                                                          | Above 2x median |
| 212765_at       | calmodulin regulated spectrin-associated protein 1-like 1                                                            | 4.69                                                          | Above 2x median |
| 220199_s_at     | axin interactor, dorsalization associated                                                                            | 4.69                                                          | Above 2x median |
| 201263_at       | threonyl-tRNA synthetase                                                                                             | 4.68                                                          | Above 2x median |
| 203910_at       | Rho GTPase activating protein 29                                                                                     | 4.68                                                          | Above 2x median |
| 203287_at       | ladinin 1                                                                                                            | 4.66                                                          | Above 2x median |
| 217165_x_at     | metallothionein 1F                                                                                                   | 4.63                                                          | Above 2x median |
| 212470_at       | sperm associated antigen 9                                                                                           | 4.61                                                          | Above 2x median |
| 202693_s_at     | serine/threonine kinase 17a                                                                                          | 4.59                                                          | Above 2x median |
| 202620_s_at     | procollagen-lysine, 2-oxoglutarate 5-dioxygenase 2                                                                   | 4.58                                                          | Above 2x median |
| 209191_at       | tubulin, beta 6                                                                                                      | 4.54                                                          | Above 2x median |
| 216348_at       | ribosomal protein S17                                                                                                | 4.47                                                          | Above 2x median |
| 200755_s_at     | calumenin                                                                                                            | 4.42                                                          | Above 2x median |
| 201645_at       | tenascin C                                                                                                           | 4.41                                                          | Above 2x median |
| 200808_s_at     | zyxin                                                                                                                | 4.38                                                          | Above 2x median |
| 201573_s_at     | eukaryotic translation termination factor 1                                                                          | 4.37                                                          | Above 2x median |
| 210058_at       | mitogen-activated protein kinase 13                                                                                  | 4.33                                                          | Above 2x median |
| 202771_at       | family with sequence similarity 38, member A                                                                         | 4.33                                                          | Above 2x median |
| 202352_s_at     | proteasome (prosome, macropain) 26S subunit, non-ATPase, 12                                                          | 4.32                                                          | Above 2x median |
| 212160_at       | exportin, tRNA (nuclear export receptor for tRNAs)                                                                   | 4.31                                                          | Above 2x median |
| 212245_at       | multiple coagulation factor deficiency 2                                                                             | 4.31                                                          | Above 2x median |
| 212190_at       | serpin peptidase inhibitor, clade E (nexin, plasminogen activator inhibitor type 1), member 2                        | 4.30                                                          | Above 2x median |
| 201595_s_at     | zinc finger CCCH-type containing 15                                                                                  | 4.25                                                          | Above 2x median |
| 212018_s_at     | ribosomal L1 domain containing 1                                                                                     | 4.25                                                          | Above 2x median |
| 212298_at       | neuropilin 1                                                                                                         | 4.25                                                          | Above 2x median |
| 202933_s_at     | v-yes-1 Yamaguchi sarcoma viral oncogene homolog 1                                                                   | 4.24                                                          | Above 2x median |
| 210396_s_at     | bolA homolog 2 (E. coli) / PI-3-kinase-related kinase SMG-1 pseudogene / PI-3-kinase-related kinase SMG-1 pseudogene | 4.22                                                          | Above 2x median |
| 221510_s_at     | glutaminase                                                                                                          | 4.20                                                          | Above 2x median |
| 212739_s_at     | non-metastatic cells 4, protein expressed in                                                                         | 4.19                                                          | Above 2x median |
| 202284_s_at     | cyclin-dependent kinase inhibitor 1A (p21, Cip1)                                                                     | 4.19                                                          | Above 2x median |
| 213532_at       | ADAM metallopeptidase domain 17                                                                                      | 4.18                                                          | Above 2x median |
| 52164_at        | chromosome 11 open reading frame 24                                                                                  | 4.16                                                          | Above 2x median |

**Supplemental Gene List I. Airway Basal Cell Signature Genes Analyzed (cont. page 8)**

| <b>Probe ID</b> | <b>Gene name</b>                                                             | <b>Median of normalized expression levels in lung adenoCa</b> |                 |
|-----------------|------------------------------------------------------------------------------|---------------------------------------------------------------|-----------------|
| 221654_s_at     | ubiquitin specific peptidase 3                                               | 4.16                                                          | Above 2x median |
| 202437_s_at     | cytochrome P450, family 1, subfamily B, polypeptide 1                        | 4.14                                                          | Above 2x median |
| 201751_at       | Josephin domain containing 1                                                 | 4.14                                                          | Above 2x median |
| 221580_s_at     | TATA box binding protein (TBP)-associated factor, RNA polymerase I, D, 41kDa | 4.13                                                          | Above 2x median |
| 209295_at       | tumor necrosis factor receptor superfamily, member 10b                       | 4.12                                                          | Above 2x median |
| 209135_at       | aspartate beta-hydroxylase                                                   | 4.12                                                          | Above 2x median |
| 209836_x_at     | bolA homolog 2 (E. coli) / bolA homolog 2B (E. coli)                         | 4.11                                                          | Above 2x median |
| 209409_at       | growth factor receptor-bound protein 10                                      | 4.07                                                          | Above 2x median |
| 200615_s_at     | adaptor-related protein complex 2, beta 1 subunit                            | 4.07                                                          | Above 2x median |
| 203414_at       | monocyte to macrophage differentiation-associated                            | 4.06                                                          | Above 2x median |
| 205479_s_at     | plasminogen activator, urokinase                                             | 4.04                                                          | Above 2x median |
| 214435_x_at     | v-ral simian leukemia viral oncogene homolog A (ras related)                 | 4.03                                                          | Above 2x median |
| 214214_s_at     | complement component 1, q subcomponent binding protein                       | 4.02                                                          | Above 2x median |
| 209100_at       | interferon-related developmental regulator 2                                 | 3.96                                                          | Above 2x median |
| 201980_s_at     | Ras suppressor protein 1                                                     | 3.95                                                          | Above 2x median |
| 201474_s_at     | integrin, alpha 3 (antigen CD49C, alpha 3 subunit of VLA-3 receptor)         | 3.84                                                          | Above 2x median |
| 203574_at       | nuclear factor, interleukin 3 regulated                                      | 3.80                                                          | Above 2x median |
| 205324_s_at     | FtsJ homolog 1 (E. coli)                                                     | 3.78                                                          | Above 2x median |
| 212104_s_at     | RNA binding protein, fox-1 homolog (C. elegans) 2                            | 3.78                                                          | Above 2x median |
| 205105_at       | mannosidase, alpha, class 2A, member 1                                       | 3.77                                                          | Above 2x median |
| 217988_at       | cyclin B1 interacting protein 1                                              | 3.76                                                          | Above 2x median |
| 209344_at       | tropomyosin 4                                                                | 3.73                                                          | Above 2x median |
| 212072_s_at     | casein kinase 2, alpha 1 polypeptide                                         | 3.71                                                          | Above 2x median |
| 202347_s_at     | ubiquitin-conjugating enzyme E2K (UBC1 homolog, yeast)                       | 3.69                                                          | Above 2x median |
| 211043_s_at     | clathrin, light chain B                                                      | 3.68                                                          | Above 2x median |
| 202686_s_at     | AXL receptor tyrosine kinase                                                 | 3.67                                                          | Above 2x median |
| 202679_at       | Niemann-Pick disease, type C1                                                | 3.67                                                          | Above 2x median |
| 212887_at       | Sec23 homolog A (S. cerevisiae)                                              | 3.65                                                          | Above 2x median |
| 205807_s_at     | tuftelin 1                                                                   | 3.65                                                          | Above 2x median |
| 217913_at       | vacuolar protein sorting 4 homolog A (S. cerevisiae)                         | 3.62                                                          | Above 2x median |
| 202148_s_at     | pyrroline-5-carboxylate reductase 1                                          | 3.62                                                          | Above 2x median |
| 213671_s_at     | methionyl-tRNA synthetase                                                    | 3.60                                                          | Above 2x median |
| 212658_at       | lipoma HMGIC fusion partner-like 2                                           | 3.59                                                          | Above 2x median |

**Supplemental Gene List I. Airway Basal Cell Signature Genes Analyzed (cont. page 9)**

| <b>Probe ID</b> | <b>Gene name</b>                                                                           | <b>Median of normalized expression levels in lung adenoCa</b> |                 |
|-----------------|--------------------------------------------------------------------------------------------|---------------------------------------------------------------|-----------------|
| 202369_s_at     | translocation associated membrane protein 2                                                | 3.58                                                          | Above 2x median |
| 218421_at       | ceramide kinase                                                                            | 3.55                                                          | Above 2x median |
| 202431_s_at     | v-myc myelocytomatosis viral oncogene homolog (avian)                                      | 3.51                                                          | Above 2x median |
| 210740_s_at     | inositol 1,3,4-triphosphate 5/6 kinase                                                     | 3.47                                                          | Above 2x median |
| 202575_at       | cellular retinoic acid binding protein 2                                                   | 3.47                                                          | Above 2x median |
| 37152_at        | peroxisome proliferator-activated receptor delta                                           | 3.46                                                          | Above 2x median |
| 218982_s_at     | mitochondrial ribosomal protein S17 / zinc finger protein 713                              | 3.46                                                          | Above 2x median |
| 216268_s_at     | jagged 1                                                                                   | 3.46                                                          | Above 2x median |
| 202224_at       | v-crk sarcoma virus CT10 oncogene homolog (avian)                                          | 3.45                                                          | Above 2x median |
| 217943_s_at     | MAP7 domain containing 1                                                                   | 3.44                                                          | Above 2x median |
| 212355_at       | KH and NYN domain containing                                                               | 3.44                                                          | Above 2x median |
| 218131_s_at     | GATA zinc finger domain containing 2A                                                      | 3.42                                                          | Above 2x median |
| 203725_at       | growth arrest and DNA-damage-inducible, alpha                                              | 3.41                                                          | Above 2x median |
| 208925_at       | claudin domain containing 1                                                                | 3.35                                                          | Above 2x median |
| 201695_s_at     | purine nucleoside phosphorylase                                                            | 3.33                                                          | Above 2x median |
| 208824_x_at     | cyclin-dependent kinase 16                                                                 | 3.33                                                          | Above 2x median |
| 218018_at       | pyridoxal (pyridoxine, vitamin B6) kinase                                                  | 3.33                                                          | Above 2x median |
| 209365_s_at     | extracellular matrix protein 1                                                             | 3.29                                                          | Above 2x median |
| 201516_at       | spermidine synthase                                                                        | 3.27                                                          | Above 2x median |
| 221489_s_at     | sprouty homolog 4 (Drosophila)                                                             | 3.18                                                          | Above 2x median |
| 209264_s_at     | tetraspanin 4                                                                              | 3.18                                                          | Above 2x median |
| 204319_s_at     | regulator of G-protein signaling 10                                                        | 3.18                                                          | Above 2x median |
| 209457_at       | dual specificity phosphatase 5                                                             | 3.18                                                          | Above 2x median |
| 202696_at       | oxidative-stress responsive 1                                                              | 3.18                                                          | Above 2x median |
| 204331_s_at     | mitochondrial ribosomal protein S12                                                        | 3.17                                                          | Above 2x median |
| 209651_at       | transforming growth factor beta 1 induced transcript 1                                     | 3.16                                                          | Above 2x median |
| 204034_at       | ethylmalonic encephalopathy 1                                                              | 3.16                                                          | Above 2x median |
| 202855_s_at     | solute carrier family 16, member 3 (monocarboxylic acid transporter 4)                     | 3.16                                                          | Above 2x median |
| 221931_s_at     | SEH1-like (S. cerevisiae)                                                                  | 3.16                                                          | Above 2x median |
| 201481_s_at     | phosphorylase, glycogen; brain                                                             | 3.15                                                          | Above 2x median |
| 203740_at       | M-phase phosphoprotein 6                                                                   | 3.13                                                          | Above 2x median |
| 218732_at       | peptidyl-tRNA hydrolase 2                                                                  | 3.11                                                          | Above 2x median |
| 212110_at       | solute carrier family 39 (zinc transporter), member 14                                     | 3.11                                                          | Above 2x median |
| 200924_s_at     | solute carrier family 3 (activators of dibasic and neutral amino acid transport), member 2 | 3.11                                                          | Above 2x median |
| 217492_s_at     | phosphatase and tensin homolog / phosphatase and tensin                                    | 3.11                                                          | Above 2x median |

**Supplemental Gene List I. Airway Basal Cell Signature Genes Analyzed (cont. page 10)**

| <b>Probe ID</b> | <b>Gene name</b>                                                                      | <b>Median of normalized expression levels in lung adenoCa</b> |                 |
|-----------------|---------------------------------------------------------------------------------------|---------------------------------------------------------------|-----------------|
|                 | homolog pseudogene 1                                                                  |                                                               |                 |
| 204334_at       | Kruppel-like factor 7 (ubiquitous)                                                    | 3.08                                                          | Above 2x median |
| 210916_s_at     | CD44 molecule (Indian blood group)                                                    | 3.07                                                          | Above 2x median |
| 209260_at       | stratifin                                                                             | 3.06                                                          | Above 2x median |
| 218656_s_at     | lipoma HMGIC fusion partner                                                           | 3.04                                                          | Above 2x median |
| 218092_s_at     | ArfGAP with FG repeats 1                                                              | 3.04                                                          | Above 2x median |
| 202894_at       | EPH receptor B4                                                                       | 3.04                                                          | Above 2x median |
| 203085_s_at     | transforming growth factor, beta 1                                                    | 3.03                                                          | Above 2x median |
| 214696_at       | chromosome 17 open reading frame 91                                                   | 3.02                                                          | Above 2x median |
| 218826_at       | solute carrier family 35, member F2                                                   | 3.02                                                          | Above 2x median |
| 209187_at       | down-regulator of transcription 1, TBP-binding (negative cofactor 2)                  | 3.01                                                          | Above 2x median |
| 206688_s_at     | cleavage and polyadenylation specific factor 4, 30kDa                                 | 2.98                                                          | Above 2x median |
| 219648_at       | melanoregulin                                                                         | 2.97                                                          | Above 2x median |
| 205361_s_at     | prefoldin subunit 4                                                                   | 2.96                                                          | Above 2x median |
| 219121_s_at     | epithelial splicing regulatory protein 1                                              | 2.94                                                          | Above 2x median |
| 203279_at       | ER degradation enhancer, mannosidase alpha-like 1                                     | 2.93                                                          | Above 2x median |
| 201195_s_at     | solute carrier family 7 (cationic amino acid transporter, y+ system), member 5        | 2.93                                                          | Above 2x median |
| 203256_at       | cadherin 3, type 1, P-cadherin (placental)                                            | 2.91                                                          | Above 2x median |
| 203550_s_at     | family with sequence similarity 189, member B                                         | 2.89                                                          | Above 2x median |
| 221667_s_at     | heat shock 22kDa protein 8                                                            | 2.89                                                          | Above 2x median |
| 219933_at       | glutaredoxin 2                                                                        | 2.88                                                          | Above 2x median |
| 221753_at       | slingshot homolog 1 (Drosophila)                                                      | 2.88                                                          | Above 2x median |
| 203002_at       | angiominin like 2                                                                     | 2.86                                                          | Above 2x median |
| 213524_s_at     | G0/G1switch 2                                                                         | 2.85                                                          | Above 2x median |
| 203821_at       | heparin-binding EGF-like growth factor                                                | 2.81                                                          | Above 2x median |
| 207826_s_at     | inhibitor of DNA binding 3, dominant negative helix-loop-helix protein                | 2.80                                                          | Above 2x median |
| 202998_s_at     | lysyl oxidase-like 2                                                                  | 2.78                                                          | Above 2x median |
| 221050_s_at     | GTP binding protein 2                                                                 | 2.78                                                          | Above 2x median |
| 203405_at       | proteasome (prosome, macropain) assembly chaperone 1                                  | 2.77                                                          | Above 2x median |
| 218145_at       | tribbles homolog 3 (Drosophila)                                                       | 2.75                                                          | Above 2x median |
| 218193_s_at     | golgi transport 1B                                                                    | 2.73                                                          | Above 2x median |
| 204748_at       | prostaglandin-endoperoxide synthase 2 (prostaglandin G/H synthase and cyclooxygenase) | 2.73                                                          | Above 2x median |
| 203297_s_at     | jumonji, AT rich interactive domain 2                                                 | 2.73                                                          | Above 2x median |
| 218046_s_at     | mitochondrial ribosomal protein S16                                                   | 2.71                                                          | Above 2x median |

**Supplemental Gene List I. Airway Basal Cell Signature Genes Analyzed (cont. page 11)**

| <b>Probe ID</b> | <b>Gene name</b>                                                                              | <b>Median of normalized expression levels in lung adenoCa</b> |                 |
|-----------------|-----------------------------------------------------------------------------------------------|---------------------------------------------------------------|-----------------|
| 212612_at       | REST corepressor 1                                                                            | 2.71                                                          | Above 2x median |
| 209369_at       | annexin A3                                                                                    | 2.70                                                          | Above 2x median |
| 202754_at       | R3H domain containing 1                                                                       | 2.69                                                          | Above 2x median |
| 204616_at       | ubiquitin carboxyl-terminal esterase L3 (ubiquitin thiolesterase)                             | 2.69                                                          | Above 2x median |
| 204214_s_at     | RAB32, member RAS oncogene family                                                             | 2.68                                                          | Above 2x median |
| 217996_at       | pleckstrin homology-like domain, family A, member 1                                           | 2.68                                                          | Above 2x median |
| 202934_at       | hexokinase 2                                                                                  | 2.68                                                          | Above 2x median |
| 201016_at       | eukaryotic translation initiation factor 1A, X-linked                                         | 2.67                                                          | Above 2x median |
| 207172_s_at     | cadherin 11, type 2, OB-cadherin (osteoblast)                                                 | 2.67                                                          | Above 2x median |
| 218401_s_at     | zinc finger protein 281                                                                       | 2.66                                                          | Above 2x median |
| 212556_at       | scribbled homolog (Drosophila)                                                                | 2.66                                                          | Above 2x median |
| 209096_at       | ubiquitin-conjugating enzyme E2 variant 2                                                     | 2.65                                                          | Above 2x median |
| 210970_s_at     | inhibitor of Bruton agammaglobulinemia tyrosine kinase                                        | 2.63                                                          | Above 2x median |
| 213457_at       | malignant fibrous histiocytoma amplified sequence 1                                           | 2.60                                                          | Above 2x median |
| 210517_s_at     | A kinase (PRKA) anchor protein 12                                                             | 2.59                                                          | Above 2x median |
| 204971_at       | cystatin A (stefin A)                                                                         | 2.59                                                          | Above 2x median |
| 218669_at       | RAP2C, member of RAS oncogene family                                                          | 2.57                                                          | Above 2x median |
| 212845_at       | sterile alpha motif domain containing 4A                                                      | 2.57                                                          | Above 2x median |
| 202806_at       | drebrin 1                                                                                     | 2.55                                                          | Above 2x median |
| 202734_at       | thyroid hormone receptor interactor 10                                                        | 2.54                                                          | Above 2x median |
| 203373_at       | suppressor of cytokine signaling 2                                                            | 2.53                                                          | Above 2x median |
| 213734_at       | WD repeat and SOCS box-containing 2                                                           | 2.53                                                          | Above 2x median |
| 212647_at       | related RAS viral (r-ras) oncogene homolog                                                    | 2.52                                                          | Above 2x median |
| 205047_s_at     | asparagine synthetase (glutamine-hydrolyzing)                                                 | 2.52                                                          | Above 2x median |
| 218051_s_at     | 5'-nucleotidase domain containing 2                                                           | 2.50                                                          | Above 2x median |
| 202557_at       | heat shock protein 70kDa family, member 13                                                    | 2.48                                                          | Above 2x median |
| 219024_at       | pleckstrin homology domain containing, family A (phosphoinositide binding specific) member 1  | 2.47                                                          | Above 2x median |
| 202628_s_at     | serpin peptidase inhibitor, clade E (nexin, plasminogen activator inhibitor type 1), member 1 | 2.47                                                          | Above 2x median |
| 210869_s_at     | melanoma cell adhesion molecule                                                               | 2.46                                                          | Above 2x median |
| 212590_at       | related RAS viral (r-ras) oncogene homolog 2                                                  | 2.46                                                          | Above 2x median |
| 208962_s_at     | fatty acid desaturase 1                                                                       | 2.45                                                          | Above 2x median |
| 212607_at       | v-akt murine thymoma viral oncogene homolog 3 (protein kinase B, gamma)                       | 2.45                                                          | Above 2x median |
| 205729_at       | oncostatin M receptor                                                                         | 2.43                                                          | Above 2x median |
| 37462_i_at      | splicing factor 3a, subunit 2, 66kDa                                                          | 2.43                                                          | Above 2x median |

**Supplemental Gene List I. Airway Basal Cell Signature Genes Analyzed (cont. page 12)**

| <b>Probe ID</b> | <b>Gene name</b>                                                                                     | <b>Median of normalized expression levels in lung adenoCa</b> |                 |
|-----------------|------------------------------------------------------------------------------------------------------|---------------------------------------------------------------|-----------------|
| 201984_s_at     | epidermal growth factor receptor                                                                     | 2.42                                                          | Above 2x median |
| 218995_s_at     | endothelin 1                                                                                         | 2.41                                                          | Above 2x median |
| 213554_s_at     | CDV3 homolog (mouse)                                                                                 | 2.40                                                          | Above 2x median |
| 202779_s_at     | ubiquitin-conjugating enzyme E2S                                                                     | 2.40                                                          | Above 2x median |
| 217875_s_at     | prostate transmembrane protein, androgen induced 1                                                   | 2.39                                                          | Above 2x median |
| 209444_at       | RAP1, GTP-GDP dissociation stimulator 1                                                              | 2.38                                                          | Above 2x median |
| 212992_at       | AHNAK nucleoprotein 2                                                                                | 2.37                                                          | Above 2x median |
| 203585_at       | zinc finger protein 185 (LIM domain)                                                                 | 2.37                                                          | Above 2x median |
| 203258_at       | DR1-associated protein 1 (negative cofactor 2 alpha)                                                 | 2.35                                                          | Above 2x median |
| 222162_s_at     | ADAM metallopeptidase with thrombospondin type 1 motif, 1                                            | 2.35                                                          | Above 2x median |
| 214431_at       | guanine monphosphate synthetase                                                                      | 2.34                                                          | Above 2x median |
| 204194_at       | BTB and CNC homology 1, basic leucine zipper transcription factor 1                                  | 2.34                                                          | Above 2x median |
| 216088_s_at     | proteasome (prosome, macropain) subunit, alpha type, 7                                               | 2.34                                                          | Above 2x median |
| 201505_at       | laminin, beta 1                                                                                      | 2.32                                                          | Above 2x median |
| 218238_at       | GTP binding protein 4                                                                                | 2.32                                                          | Above 2x median |
| 201791_s_at     | 7-dehydrocholesterol reductase                                                                       | 2.31                                                          | Above 2x median |
| 218849_s_at     | protein phosphatase 1, regulatory (inhibitor) subunit 13 like                                        | 2.31                                                          | Above 2x median |
| 218499_at       | serine/threonine protein kinase MST4                                                                 | 2.26                                                          | Above 2x median |
| 203234_at       | uridine phosphorylase 1                                                                              | 2.25                                                          | Above 2x median |
| 221437_s_at     | mitochondrial ribosomal protein S15                                                                  | 2.25                                                          | Above 2x median |
| 204977_at       | DEAD (Asp-Glu-Ala-Asp) box polypeptide 10                                                            | 2.24                                                          | Above 2x median |
| 212527_at       | PPPDE peptidase domain containing 2                                                                  | 2.23                                                          | Above 2x median |
| 204976_s_at     | Alport syndrome, mental retardation, midface hypoplasia and elliptocytosis chromosomal region gene 1 | 2.23                                                          | Above 2x median |
| 202912_at       | adrenomedullin                                                                                       | 2.22                                                          | Above 2x median |
| 201389_at       | integrin, alpha 5 (fibronectin receptor, alpha polypeptide)                                          | 2.21                                                          | Above 2x median |
| 201692_at       | sigma non-opioid intracellular receptor 1                                                            | 2.20                                                          | Above 2x median |
| 218526_s_at     | RAN guanine nucleotide release factor                                                                | 2.19                                                          | Above 2x median |
| 202543_s_at     | glia maturation factor, beta                                                                         | 2.19                                                          | Above 2x median |
| 217784_at       | YKT6 v-SNARE homolog (S. cerevisiae)                                                                 | 2.17                                                          | Above 2x median |
| 205463_s_at     | platelet-derived growth factor alpha polypeptide                                                     | 2.17                                                          | Above 2x median |
| 209324_s_at     | regulator of G-protein signaling 16                                                                  | 2.15                                                          | Above 2x median |
| 219155_at       | phosphatidylinositol transfer protein, cytoplasmic 1                                                 | 2.15                                                          | Above 2x median |
| 213757_at       | Eukaryotic translation initiation factor 5A                                                          | 2.14                                                          | Above 2x median |
| 202158_s_at     | CUGBP, Elav-like family member 2                                                                     | 2.13                                                          | Above 2x median |

**Supplemental Gene List I. Airway Basal Cell Signature Genes Analyzed (cont. page 13)**

| <b>Probe ID</b> | <b>Gene name</b>                                                  | <b>Median of normalized expression levels in lung adenoCa</b> |                 |
|-----------------|-------------------------------------------------------------------|---------------------------------------------------------------|-----------------|
| 209383_at       | DNA-damage-inducible transcript 3                                 | 2.11                                                          | Above 2x median |
| 201380_at       | cartilage associated protein                                      | 2.11                                                          | Above 2x median |
| 209278_s_at     | tissue factor pathway inhibitor 2                                 | 2.11                                                          | Above 2x median |
| 217437_s_at     | transforming, acidic coiled-coil containing protein 1             | 2.10                                                          | Above 2x median |
| 208002_s_at     | acyl-CoA thioesterase 7                                           | 2.09                                                          | Above 2x median |
| 202847_at       | phosphoenolpyruvate carboxykinase 2 (mitochondrial)               | 2.08                                                          | Above 2x median |
| 204285_s_at     | phorbol-12-myristate-13-acetate-induced protein 1                 | 2.07                                                          | Above 2x median |
| 203672_x_at     | thiopurine S-methyltransferase                                    | 2.06                                                          | Above 2x median |
| 218777_at       | receptor accessory protein 4                                      | 2.05                                                          | Above 2x median |
| 218647_s_at     | yrdC domain containing (E. coli)                                  | 2.05                                                          | Above 2x median |
| 207030_s_at     | cysteine and glycine-rich protein 2                               | 2.04                                                          | Above 2x median |
| 204647_at       | homer homolog 3 (Drosophila)                                      | 2.02                                                          | Above 2x median |
| 204268_at       | S100 calcium binding protein A2                                   | 2.02                                                          | Above 2x median |
| 221539_at       | eukaryotic translation initiation factor 4E binding protein 1     | 2.02                                                          | Above 2x median |
| 218796_at       | fermitin family member 1                                          | 2.01                                                          | Above 2x median |
| 203741_s_at     | adenylate cyclase 7                                               | 1.99                                                          |                 |
| 204255_s_at     | vitamin D (1,25- dihydroxyvitamin D3) receptor                    | 1.99                                                          |                 |
| 218451_at       | CUB domain containing protein 1                                   | 1.97                                                          |                 |
| 203939_at       | 5'-nucleotidase, ecto (CD73)                                      | 1.94                                                          |                 |
| 218247_s_at     | mex-3 homolog C (C. elegans)                                      | 1.94                                                          |                 |
| 202146_at       | interferon-related developmental regulator 1                      | 1.94                                                          |                 |
| 202647_s_at     | neuroblastoma RAS viral (v-ras) oncogene homolog                  | 1.94                                                          |                 |
| 218498_s_at     | ERO1-like (S. cerevisiae)                                         | 1.92                                                          |                 |
| 202314_at       | cytochrome P450, family 51, subfamily A, polypeptide 1            | 1.92                                                          |                 |
| 217266_at       | ribosomal protein L15                                             | 1.90                                                          |                 |
| 206571_s_at     | mitogen-activated protein kinase kinase kinase kinase 4           | 1.89                                                          |                 |
| 205239_at       | amphiregulin                                                      | 1.88                                                          |                 |
| 201787_at       | fibulin 1                                                         | 1.87                                                          |                 |
| 202131_s_at     | RIO kinase 3 (yeast)                                              | 1.86                                                          |                 |
| 203693_s_at     | E2F transcription factor 3                                        | 1.85                                                          |                 |
| 201387_s_at     | ubiquitin carboxyl-terminal esterase L1 (ubiquitin thiolesterase) | 1.84                                                          |                 |
| 202267_at       | laminin, gamma 2                                                  | 1.84                                                          |                 |
| 216620_s_at     | Rho guanine nucleotide exchange factor (GEF) 10                   | 1.83                                                          |                 |
| 213062_at       | N-terminal asparagine amidase                                     | 1.83                                                          |                 |
| 201656_at       | integrin, alpha 6                                                 | 1.83                                                          |                 |
| 219099_at       | chromosome 12 open reading frame 5                                | 1.81                                                          |                 |
| 205016_at       | transforming growth factor, alpha                                 | 1.81                                                          |                 |

**Supplemental Gene List I. Airway Basal Cell Signature Genes Analyzed (cont. page 14)**

| <b>Probe ID</b> | <b>Gene name</b>                                                                                                  | <b>Median of normalized expression levels in lung adenoCa</b> |
|-----------------|-------------------------------------------------------------------------------------------------------------------|---------------------------------------------------------------|
| 203695_s_at     | deafness, autosomal dominant 5                                                                                    | 1.81                                                          |
| 218888_s_at     | neuropilin (NRP) and tolloid (TLL)-like 2                                                                         | 1.79                                                          |
| 207357_s_at     | UDP-N-acetyl-alpha-D-galactosamine:polypeptide N-acetylgalactosaminyltransferase 10 (GalNAc-T10)                  | 1.79                                                          |
| 210026_s_at     | caspase recruitment domain family, member 10                                                                      | 1.78                                                          |
| 204693_at       | CDC42 effector protein (Rho GTPase binding) 1                                                                     | 1.77                                                          |
| 219856_at       | chromosome 1 open reading frame 116                                                                               | 1.76                                                          |
| 31845_at        | E74-like factor 4 (ets domain transcription factor)                                                               | 1.76                                                          |
| 209308_s_at     | BCL2/adenovirus E1B 19kDa interacting protein 2                                                                   | 1.75                                                          |
| 204435_at       | nucleoporin like 1                                                                                                | 1.74                                                          |
| 202613_at       | CTP synthase                                                                                                      | 1.71                                                          |
| 200690_at       | heat shock 70kDa protein 9 (mortalin)                                                                             | 1.71                                                          |
| 203074_at       | annexin A8 / annexin A8-like 1 / annexin A8-like 2                                                                | 1.71                                                          |
| 216383_at       | ribosomal protein L18a /// ribosomal protein L18a pseudogene 3                                                    | 1.70                                                          |
| 219256_s_at     | SH3 domain and tetratricopeptide repeats 1                                                                        | 1.69                                                          |
| 209283_at       | crystallin, alpha B                                                                                               | 1.69                                                          |
| 202728_s_at     | latent transforming growth factor beta binding protein 1                                                          | 1.69                                                          |
| 218038_at       | ATP5S-like                                                                                                        | 1.69                                                          |
| 213094_at       | G protein-coupled receptor 126                                                                                    | 1.68                                                          |
| 206884_s_at     | sciellin                                                                                                          | 1.67                                                          |
| 202196_s_at     | dickkopf homolog 3 (Xenopus laevis)                                                                               | 1.67                                                          |
| 204475_at       | matrix metalloproteinase 1 (interstitial collagenase)                                                             | 1.67                                                          |
| 203726_s_at     | laminin, alpha 3                                                                                                  | 1.65                                                          |
| 209433_s_at     | phosphoribosyl pyrophosphate amidotransferase                                                                     | 1.65                                                          |
| 206714_at       | arachidonate 15-lipoxygenase, type B                                                                              | 1.64                                                          |
| 215084_s_at     | leucine rich repeat containing 42                                                                                 | 1.63                                                          |
| 219045_at       | ras homolog gene family, member F (in filopodia)                                                                  | 1.63                                                          |
| 218828_at       | phospholipid scramblase 3                                                                                         | 1.62                                                          |
| 213010_at       | protein kinase C, delta binding protein                                                                           | 1.62                                                          |
| 203592_s_at     | folliculin-like 3 (secreted glycoprotein)                                                                         | 1.61                                                          |
| 205349_at       | guanine nucleotide binding protein (G protein), alpha 15 (Gq class)                                               | 1.61                                                          |
| 203562_at       | fasciculation and elongation protein zeta 1 (zygin I)                                                             | 1.60                                                          |
| 203348_s_at     | ets variant 5                                                                                                     | 1.60                                                          |
| 203370_s_at     | PDZ and LIM domain 7 (enigma)                                                                                     | 1.60                                                          |
| 204030_s_at     | IQ motif containing J-schwannomin interacting protein 1 read-through transcript / schwannomin interacting protein | 1.59                                                          |



**Supplemental Gene List I. Airway Basal Cell Signature Genes Analyzed (cont. page 15)**

| <b>Probe ID</b> | <b>Gene name</b>                                                                                | <b>Median of normalized expression levels in lung adenoCa</b> |
|-----------------|-------------------------------------------------------------------------------------------------|---------------------------------------------------------------|
|                 | 1                                                                                               |                                                               |
| 222235_s_at     | chondroitin sulfate N-acetylgalactosaminyltransferase 2                                         | 1.58                                                          |
| 203105_s_at     | dynamamin 1-like                                                                                | 1.58                                                          |
| 219038_at       | MORC family CW-type zinc finger 4                                                               | 1.58                                                          |
| 204955_at       | sushi-repeat-containing protein, X-linked                                                       | 1.58                                                          |
| 214097_at       | ribosomal protein S21                                                                           | 1.56                                                          |
| 214075_at       | neuron derived neurotrophic factor                                                              | 1.56                                                          |
| 211071_s_at     | myeloid/lymphoid or mixed-lineage leukemia (trithorax homolog, Drosophila); translocated to, 11 | 1.55                                                          |
| 209453_at       | solute carrier family 9 (sodium/hydrogen exchanger), member 1                                   | 1.54                                                          |
| 218717_s_at     | leprecan-like 1                                                                                 | 1.54                                                          |
| 221039_s_at     | ArfGAP with SH3 domain, ankyrin repeat and PH domain 1                                          | 1.51                                                          |
| 219437_s_at     | ankyrin repeat domain 11                                                                        | 1.50                                                          |
| 218823_s_at     | potassium channel tetramerisation domain containing 9                                           | 1.47                                                          |
| 213139_at       | snail homolog 2 (Drosophila)                                                                    | 1.47                                                          |
| 212702_s_at     | bicaudal D homolog 2 (Drosophila)                                                               | 1.46                                                          |
| 203963_at       | carbonic anhydrase XII                                                                          | 1.45                                                          |
| 205289_at       | bone morphogenetic protein 2                                                                    | 1.45                                                          |
| 202701_at       | bone morphogenetic protein 1                                                                    | 1.45                                                          |
| 202422_s_at     | acyl-CoA synthetase long-chain family member 4                                                  | 1.45                                                          |
| 209890_at       | tetraspanin 5                                                                                   | 1.44                                                          |
| 205180_s_at     | ADAM metallopeptidase domain 8                                                                  | 1.43                                                          |
| 219496_at       | ankyrin repeat domain 57                                                                        | 1.43                                                          |
| 203180_at       | aldehyde dehydrogenase 1 family, member A3                                                      | 1.43                                                          |
| 214168_s_at     | tight junction protein 1 (zona occludens 1)                                                     | 1.43                                                          |
| 218156_s_at     | TSR1, 20S rRNA accumulation, homolog (S. cerevisiae)                                            | 1.43                                                          |
| 212290_at       | solute carrier family 7 (cationic amino acid transporter, y+ system), member 1                  | 1.43                                                          |
| 202735_at       | emopamil binding protein (sterol isomerase)                                                     | 1.43                                                          |
| 209894_at       | leptin receptor                                                                                 | 1.42                                                          |
| 204686_at       | insulin receptor substrate 1                                                                    | 1.42                                                          |
| 212563_at       | block of proliferation 1                                                                        | 1.42                                                          |
| 212094_at       | paternally expressed 10                                                                         | 1.40                                                          |
| 219412_at       | RAB38, member RAS oncogene family                                                               | 1.39                                                          |
| 204928_s_at     | solute carrier family 10 (sodium/bile acid cotransporter family), member 3                      | 1.39                                                          |

**Supplemental Gene List I. Airway Basal Cell Signature Genes Analyzed (cont. page 16)**

| <b>Probe ID</b> | <b>Gene name</b>                                                           | <b>Median of normalized expression levels in lung adenoCa</b> |
|-----------------|----------------------------------------------------------------------------|---------------------------------------------------------------|
| 212657_s_at     | interleukin 1 receptor antagonist                                          | 1.39                                                          |
| 205264_at       | CD3e molecule, epsilon associated protein                                  | 1.39                                                          |
| 209053_s_at     | Wolf-Hirschhorn syndrome candidate 1                                       | 1.38                                                          |
| 213696_s_at     | mediator complex subunit 8                                                 | 1.38                                                          |
| 221156_x_at     | cell cycle progression 1                                                   | 1.38                                                          |
| 204257_at       | fatty acid desaturase 3                                                    | 1.37                                                          |
| 203543_s_at     | Kruppel-like factor 9                                                      | 1.37                                                          |
| 213848_at       | dual specificity phosphatase 7                                             | 1.37                                                          |
| 219991_at       | solute carrier family 2 (facilitated glucose transporter), member 9        | 1.37                                                          |
| 202218_s_at     | fatty acid desaturase 2                                                    | 1.36                                                          |
| 217948_at       | family with sequence similarity 127, member B                              | 1.36                                                          |
| 215411_s_at     | TRAF3 interacting protein 2                                                | 1.36                                                          |
| 40284_at        | forkhead box A2                                                            | 1.36                                                          |
| 201819_at       | scavenger receptor class B, member 1                                       | 1.35                                                          |
| 203851_at       | insulin-like growth factor binding protein 6                               | 1.35                                                          |
| 213793_s_at     | homer homolog 1 (Drosophila)                                               | 1.35                                                          |
| 202787_s_at     | mitogen-activated protein kinase-activated protein kinase 3                | 1.34                                                          |
| 219483_s_at     | porcupine homolog (Drosophila)                                             | 1.34                                                          |
| 221268_s_at     | sphingosine-1-phosphate phosphatase 1                                      | 1.33                                                          |
| 213927_at       | mitogen-activated protein kinase kinase kinase 9                           | 1.33                                                          |
| 209301_at       | carbonic anhydrase II                                                      | 1.33                                                          |
| 205404_at       | hydroxysteroid (11-beta) dehydrogenase 1                                   | 1.32                                                          |
| 206247_at       | MHC class I polypeptide-related sequence B                                 | 1.32                                                          |
| 206170_at       | adrenergic, beta-2-, receptor, surface                                     | 1.32                                                          |
| 218644_at       | pleckstrin 2                                                               | 1.30                                                          |
| 209524_at       | hepatoma-derived growth factor, related protein 3                          | 1.30                                                          |
| 216548_x_at     | high-mobility group box pseudogene 1                                       | 1.30                                                          |
| 204203_at       | CCAAT/enhancer binding protein (C/EBP), gamma                              | 1.30                                                          |
| 210854_x_at     | solute carrier family 6 (neurotransmitter transporter, creatine), member 8 | 1.29                                                          |
| 204222_s_at     | GLI pathogenesis-related 1                                                 | 1.29                                                          |
| 217790_s_at     | signal sequence receptor, gamma (translocon-associated protein gamma)      | 1.28                                                          |
| 218817_at       | signal peptidase complex subunit 3 homolog (S. cerevisiae)                 | 1.28                                                          |
| 39402_at        | interleukin 1, beta                                                        | 1.27                                                          |
| 202712_s_at     | creatine kinase, mitochondrial 1A / creatine kinase,                       | 1.27                                                          |

**Supplemental Gene List I. Airway Basal Cell Signature Genes Analyzed (cont. page 17)**

| <b>Probe ID</b> | <b>Gene name</b>                                                                                             | <b>Median of normalized expression levels in lung adenoCa</b> |
|-----------------|--------------------------------------------------------------------------------------------------------------|---------------------------------------------------------------|
|                 | mitochondrial 1B                                                                                             |                                                               |
| 221027_s_at     | phospholipase A2, group XIIA                                                                                 | 1.25                                                          |
| 204639_at       | adenosine deaminase                                                                                          | 1.25                                                          |
| 219275_at       | programmed cell death 5                                                                                      | 1.25                                                          |
| 206467_x_at     | regulator of telomere elongation helicase 1 /// tumor necrosis factor receptor superfamily, member 6b, decoy | 1.23                                                          |
| 213100_at       | unc-5 homolog B (C. elegans)                                                                                 | 1.22                                                          |
| 209441_at       | Rho-related BTB domain containing 2                                                                          | 1.22                                                          |
| 209714_s_at     | cyclin-dependent kinase inhibitor 3                                                                          | 1.22                                                          |
| 217094_s_at     | itchy E3 ubiquitin protein ligase homolog (mouse)                                                            | 1.22                                                          |
| 218392_x_at     | sideroflexin 1                                                                                               | 1.21                                                          |
| 220892_s_at     | phosphoserine aminotransferase 1                                                                             | 1.21                                                          |
| 204058_at       | malic enzyme 1, NADP(+)-dependent, cytosolic                                                                 | 1.21                                                          |
| 219901_at       | FYVE, RhoGEF and PH domain containing 6                                                                      | 1.20                                                          |
| 218055_s_at     | WD repeat domain 41                                                                                          | 1.19                                                          |
| 204819_at       | FYVE, RhoGEF and PH domain containing 1                                                                      | 1.19                                                          |
| 219366_at       | apoptosis, caspase activation inhibitor                                                                      | 1.19                                                          |
| 219959_at       | molybdenum cofactor sulfurase                                                                                | 1.18                                                          |
| 218705_s_at     | sorting nexin 24                                                                                             | 1.17                                                          |
| 218077_s_at     | zinc finger, DHHC-type containing 3                                                                          | 1.17                                                          |
| 216971_s_at     | Plectin                                                                                                      | 1.17                                                          |
| 205904_at       | MHC class I polypeptide-related sequence A                                                                   | 1.17                                                          |
| 210357_s_at     | spermine oxidase                                                                                             | 1.16                                                          |
| 201397_at       | phosphoglycerate dehydrogenase                                                                               | 1.16                                                          |
| 219892_at       | transmembrane 6 superfamily member 1                                                                         | 1.15                                                          |
| 213230_at       | cerebellar degeneration-related protein 2-like                                                               | 1.13                                                          |
| 203650_at       | protein C receptor, endothelial                                                                              | 1.13                                                          |
| 218700_s_at     | RAB7, member RAS oncogene family-like 1                                                                      | 1.11                                                          |
| 37966_at        | parvin, beta                                                                                                 | 1.11                                                          |
| 205234_at       | solute carrier family 16, member 4 (monocarboxylic acid transporter 5)                                       | 1.11                                                          |
| 219431_at       | Rho GTPase activating protein 10                                                                             | 1.11                                                          |
| 203888_at       | thrombomodulin                                                                                               | 1.11                                                          |
| 214866_at       | plasminogen activator, urokinase receptor                                                                    | 1.10                                                          |
| 206857_s_at     | FK506 binding protein 1B, 12.6 kDa                                                                           | 1.10                                                          |
| 201181_at       | guanine nucleotide binding protein (G protein), alpha inhibiting activity polypeptide 3                      | 1.09                                                          |
| 219569_s_at     | transmembrane protein 22                                                                                     | 1.08                                                          |

**Supplemental Gene List I. Airway Basal Cell Signature Genes Analyzed (cont. page 18)**

| <b>Probe ID</b> | <b>Gene name</b>                                                                                 | <b>Median of normalized expression levels in lung adenoCa</b> |
|-----------------|--------------------------------------------------------------------------------------------------|---------------------------------------------------------------|
| 219878_s_at     | Kruppel-like factor 13                                                                           | 1.08                                                          |
| 210705_s_at     | tripartite motif-containing 5                                                                    | 1.06                                                          |
| 221803_s_at     | nuclear receptor binding factor 2                                                                | 1.05                                                          |
| 220610_s_at     | leucine rich repeat (in FLII) interacting protein 2                                              | 1.04                                                          |
| 219271_at       | UDP-N-acetyl-alpha-D-galactosamine:polypeptide N-acetylgalactosaminyltransferase 14 (GalNAc-T14) | 1.03                                                          |
| 204005_s_at     | PRKC, apoptosis, WT1, regulator                                                                  | 1.02                                                          |
| 213358_at       | KIAA0802                                                                                         | 1.02                                                          |
| 202570_s_at     | discs, large (Drosophila) homolog-associated protein 4                                           | 1.02                                                          |
| 219390_at       | FK506 binding protein 14, 22 kDa                                                                 | 1.02                                                          |
| 202067_s_at     | low density lipoprotein receptor                                                                 | 1.00                                                          |
| 209825_s_at     | uridine-cytidine kinase 2                                                                        | 1.00                                                          |
| 220789_s_at     | transforming growth factor beta regulator 4                                                      | 1.00                                                          |
| 204244_s_at     | DBF4 homolog (S. cerevisiae)                                                                     | 0.99                                                          |
| 204527_at       | myosin VA (heavy chain 12, myosin)                                                               | 0.99                                                          |
| 212816_s_at     | cystathionine-beta-synthase                                                                      | 0.98                                                          |
| 202843_at       | DnaJ (Hsp40) homolog, subfamily B, member 9                                                      | 0.98                                                          |
| 210041_s_at     | phosphoglucomutase 3                                                                             | 0.97                                                          |
| 221902_at       | G protein-coupled receptor 153                                                                   | 0.97                                                          |
| 205618_at       | proline rich Gla (G-carboxyglutamic acid) 1                                                      | 0.97                                                          |
| 205579_at       | histamine receptor H1                                                                            | 0.97                                                          |
| 221009_s_at     | angiopoietin-like 4                                                                              | 0.95                                                          |
| 218775_s_at     | WW and C2 domain containing 2                                                                    | 0.95                                                          |
| 208084_at       | integrin, beta 6                                                                                 | 0.94                                                          |
| 219582_at       | opioid growth factor receptor-like 1                                                             | 0.94                                                          |
| 220239_at       | kelch-like 7 (Drosophila)                                                                        | 0.94                                                          |
| 204120_s_at     | adenosine kinase                                                                                 | 0.94                                                          |
| 203889_at       | secretogranin V (7B2 protein)                                                                    | 0.93                                                          |
| 219058_x_at     | tubulointerstitial nephritis antigen-like 1                                                      | 0.93                                                          |
| 209371_s_at     | SH3-domain binding protein 2                                                                     | 0.93                                                          |
| 220122_at       | multiple C2 domains, transmembrane 1                                                             | 0.93                                                          |
| 222173_s_at     | TBC1 domain family, member 2                                                                     | 0.93                                                          |
| 218772_x_at     | transmembrane protein 38B                                                                        | 0.92                                                          |
| 204653_at       | transcription factor AP-2 alpha (activating enhancer binding protein 2 alpha)                    | 0.91                                                          |
| 219938_s_at     | proline-serine-threonine phosphatase interacting protein 2                                       | 0.91                                                          |
| 204958_at       | polo-like kinase 3                                                                               | 0.91                                                          |
| 205567_at       | carbohydrate (keratan sulfate Gal-6) sulfotransferase 1                                          | 0.91                                                          |

**Supplemental Gene List I. Airway Basal Cell Signature Genes Analyzed (cont. page 19)**

| <b>Probe ID</b> | <b>Gene name</b>                                                                                                           | <b>Median of normalized expression levels in lung adenoCa</b> |
|-----------------|----------------------------------------------------------------------------------------------------------------------------|---------------------------------------------------------------|
| 215243_s_at     | gap junction protein, beta 3, 31kDa                                                                                        | 0.91                                                          |
| 219654_at       | protein tyrosine phosphatase-like (proline instead of catalytic arginine), member A                                        | 0.90                                                          |
| 219361_s_at     | apoptosis enhancing nuclease                                                                                               | 0.89                                                          |
| 213012_at       | neural precursor cell expressed, developmentally down-regulated 4                                                          | 0.89                                                          |
| 205330_at       | meningioma (disrupted in balanced translocation) 1                                                                         | 0.89                                                          |
| 204750_s_at     | desmocollin 2                                                                                                              | 0.88                                                          |
| 203023_at       | NOP16 nucleolar protein homolog (yeast)                                                                                    | 0.88                                                          |
| 219979_s_at     | chromosome 11 open reading frame 73                                                                                        | 0.87                                                          |
| 210074_at       | cathepsin L2                                                                                                               | 0.87                                                          |
| 221779_at       | MICAL-like 1                                                                                                               | 0.86                                                          |
| 209946_at       | vascular endothelial growth factor C                                                                                       | 0.86                                                          |
| 204462_s_at     | solute carrier family 16, member 2 (monocarboxylic acid transporter 8)                                                     | 0.86                                                          |
| 209589_s_at     | EPH receptor B2                                                                                                            | 0.85                                                          |
| 209885_at       | ras homolog gene family, member D                                                                                          | 0.84                                                          |
| 209758_s_at     | microfibrillar associated protein 5                                                                                        | 0.83                                                          |
| 218484_at       | NADH dehydrogenase (ubiquinone) 1 alpha subcomplex, 4-like 2                                                               | 0.83                                                          |
| 203597_s_at     | WW domain binding protein 4 (formin binding protein 21)                                                                    | 0.83                                                          |
| 214073_at       | cortactin                                                                                                                  | 0.81                                                          |
| 217678_at       | solute carrier family 7, (cationic amino acid transporter, y+ system) member 11                                            | 0.81                                                          |
| 212662_at       | poliovirus receptor                                                                                                        | 0.80                                                          |
| 218818_at       | four and a half LIM domains 3                                                                                              | 0.80                                                          |
| 219911_s_at     | solute carrier organic anion transporter family, member 4A1                                                                | 0.80                                                          |
| 221127_s_at     | dickkopf homolog 3 (Xenopus laevis)                                                                                        | 0.79                                                          |
| 210005_at       | phosphoribosylglycinamide formyltransferase, phosphoribosylglycinamide synthetase, phosphoribosylaminoimidazole synthetase | 0.79                                                          |
| 206295_at       | interleukin 18 (interferon-gamma-inducing factor)                                                                          | 0.78                                                          |
| 206482_at       | PTK6 protein tyrosine kinase 6                                                                                             | 0.78                                                          |
| 213338_at       | transmembrane protein 158 (gene/pseudogene)                                                                                | 0.78                                                          |
| 205421_at       | solute carrier family 22 (extraneuronal monoamine transporter), member 3                                                   | 0.77                                                          |
| 213419_at       | amyloid beta (A4) precursor protein-binding, family B, member 2                                                            | 0.77                                                          |

**Supplemental Gene List I. Airway Basal Cell Signature Genes Analyzed (cont. page 20)**

| <b>Probe ID</b> | <b>Gene name</b>                                                                                                                                                      | <b>Median of normalized expression levels in lung adenoCa</b> |
|-----------------|-----------------------------------------------------------------------------------------------------------------------------------------------------------------------|---------------------------------------------------------------|
| 210017_at       | mucosa associated lymphoid tissue lymphoma translocation gene 1                                                                                                       | 0.77                                                          |
| 203946_s_at     | arginase, type II                                                                                                                                                     | 0.76                                                          |
| 204944_at       | protein tyrosine phosphatase, receptor type, G                                                                                                                        | 0.76                                                          |
| 209152_s_at     | transcription factor 3 (E2A immunoglobulin enhancer binding factors E12/E47)                                                                                          | 0.76                                                          |
| 219181_at       | lipase, endothelial                                                                                                                                                   | 0.75                                                          |
| 204165_at       | WAS protein family, member 1                                                                                                                                          | 0.74                                                          |
| 217253_at       | SH3-domain binding protein 2                                                                                                                                          | 0.74                                                          |
| 201564_s_at     | fascin homolog 1, actin-bundling protein (Strongylocentrotus purpuratus)                                                                                              | 0.74                                                          |
| 205376_at       | inositol polyphosphate-4-phosphatase, type II, 105kDa                                                                                                                 | 0.74                                                          |
| 204602_at       | dickkopf homolog 1 (Xenopus laevis)                                                                                                                                   | 0.73                                                          |
| 206034_at       | serpin peptidase inhibitor, clade B (ovalbumin), member 8                                                                                                             | 0.73                                                          |
| 217027_x_at     | karyopherin (importin) beta 1                                                                                                                                         | 0.73                                                          |
| 41037_at        | TEA domain family member 4                                                                                                                                            | 0.72                                                          |
| 205083_at       | aldehyde oxidase 1                                                                                                                                                    | 0.71                                                          |
| 205865_at       | AT rich interactive domain 3A (BRIGHT-like)                                                                                                                           | 0.70                                                          |
| 214452_at       | branched chain amino-acid transaminase 1, cytosolic                                                                                                                   | 0.70                                                          |
| 220658_s_at     | aryl hydrocarbon receptor nuclear translocator-like 2                                                                                                                 | 0.69                                                          |
| 205195_at       | adaptor-related protein complex 1, sigma 1 subunit                                                                                                                    | 0.69                                                          |
| 205174_s_at     | glutaminyl-peptide cyclotransferase                                                                                                                                   | 0.69                                                          |
| 206204_at       | growth factor receptor-bound protein 14                                                                                                                               | 0.69                                                          |
| 213523_at       | cyclin E1                                                                                                                                                             | 0.68                                                          |
| 204078_at       | leprecan-like 4                                                                                                                                                       | 0.68                                                          |
| 206125_s_at     | kallikrein-related peptidase 8                                                                                                                                        | 0.67                                                          |
| 213680_at       | keratin 6B                                                                                                                                                            | 0.67                                                          |
| 204347_at       | adenylate kinase 4                                                                                                                                                    | 0.66                                                          |
| 213262_at       | spastic ataxia of Charlevoix-Saguenay (sacsin)                                                                                                                        | 0.65                                                          |
| 208510_s_at     | peroxisome proliferator-activated receptor gamma                                                                                                                      | 0.64                                                          |
| 217127_at       | cystathionase (cystathionine gamma-lyase)                                                                                                                             | 0.64                                                          |
| 215812_s_at     | solute carrier family 6 (neurotransmitter transporter, creatine), member 10 (pseudogene) / solute carrier family 6 (neurotransmitter transporter, creatine), member 8 | 0.64                                                          |
| 219921_s_at     | dedicator of cytokinesis 5                                                                                                                                            | 0.63                                                          |
| 217999_s_at     | pleckstrin homology-like domain, family A, member 1                                                                                                                   | 0.63                                                          |
| 219973_at       | arylsulfatase family, member J                                                                                                                                        | 0.62                                                          |
| 211031_s_at     | CAP-GLY domain containing linker protein 2                                                                                                                            | 0.62                                                          |

**Supplemental Gene List I. Airway Basal Cell Signature Genes Analyzed (cont. page 21)**

| <b>Probe ID</b> | <b>Gene name</b>                                                                               | <b>Median of normalized expression levels in lung adenoCa</b> |
|-----------------|------------------------------------------------------------------------------------------------|---------------------------------------------------------------|
| 213112_s_at     | sequestosome 1                                                                                 | 0.62                                                          |
| 221078_s_at     | coiled-coil domain containing 88A                                                              | 0.61                                                          |
| 34187_at        | RNA binding motif, single stranded interacting protein 2                                       | 0.61                                                          |
| 214599_at       | involucrin                                                                                     | 0.61                                                          |
| 213992_at       | collagen, type IV, alpha 6                                                                     | 0.60                                                          |
| 219631_at       | low density lipoprotein receptor-related protein 12                                            | 0.60                                                          |
| 213847_at       | peripherin                                                                                     | 0.59                                                          |
| 220255_at       | Fanconi anemia, complementation group E                                                        | 0.59                                                          |
| 215082_at       | ELOVL family member 5, elongation of long chain fatty acids (FEN1/Elo2, SUR4/Elo3-like, yeast) | 0.58                                                          |
| 206173_x_at     | GA binding protein transcription factor, beta subunit 1                                        | 0.58                                                          |
| 215167_at       | mediator complex subunit 14                                                                    | 0.58                                                          |
| 206412_at       | fer (fps/fes related) tyrosine kinase                                                          | 0.58                                                          |
| 204733_at       | kallikrein-related peptidase 6                                                                 | 0.58                                                          |
| 204920_at       | carbamoyl-phosphate synthase 1, mitochondrial                                                  | 0.58                                                          |
| 205341_at       | EH-domain containing 2                                                                         | 0.57                                                          |
| 207020_at       | heat shock transcription factor 2 binding protein                                              | 0.57                                                          |
| 219522_at       | four jointed box 1 (Drosophila)                                                                | 0.57                                                          |
| 218537_at       | host cell factor C1 regulator 1 (XPO1 dependent)                                               | 0.55                                                          |
| 200951_s_at     | cyclin D2                                                                                      | 0.55                                                          |
| 205503_at       | protein tyrosine phosphatase, non-receptor type 14                                             | 0.54                                                          |
| 222242_s_at     | kallikrein-related peptidase 5                                                                 | 0.54                                                          |
| 219944_at       | CAP-GLY domain containing linker protein family, member 4                                      | 0.54                                                          |
| 209595_at       | general transcription factor IIF, polypeptide 2, 30kDa                                         | 0.53                                                          |
| 217150_s_at     | neurofibromin 2 (merlin)                                                                       | 0.53                                                          |
| 205394_at       | CHK1 checkpoint homolog (S. pombe)                                                             | 0.53                                                          |
| 207463_x_at     | protease, serine, 3                                                                            | 0.53                                                          |
| 204136_at       | collagen, type VII, alpha 1                                                                    | 0.52                                                          |
| 203071_at       | sema domain, immunoglobulin domain (Ig), short basic domain, secreted, (semaphorin) 3B         | 0.52                                                          |
| 214095_at       | serine hydroxymethyltransferase 2 (mitochondrial)                                              | 0.51                                                          |
| 206561_s_at     | aldo-keto reductase family 1, member B10 (aldose reductase)                                    | 0.51                                                          |
| 219225_at       | piggyBac transposable element derived 5                                                        | 0.50                                                          |
| 218744_s_at     | protein kinase C and casein kinase substrate in neurons 3                                      | 0.50                                                          |
| 205402_x_at     | protease, serine, 2 (trypsin 2)                                                                | 0.50                                                          |
| 210015_s_at     | microtubule-associated protein 2                                                               | 0.50                                                          |

**Supplemental Gene List I. Airway Basal Cell Signature Genes Analyzed (cont. page 22)**

| <b>Probe ID</b> | <b>Gene name</b>                                                                        | <b>Median of normalized expression levels in lung adenoCa</b> |                   |
|-----------------|-----------------------------------------------------------------------------------------|---------------------------------------------------------------|-------------------|
| 213984_at       | PDS5, regulator of cohesion maintenance, homolog A (S. cerevisiae)                      | 0.49                                                          | Below 0.5x median |
| 208025_s_at     | high mobility group AT-hook 2                                                           | 0.49                                                          | Below 0.5x median |
| 204854_at       | leprecan-like 2                                                                         | 0.49                                                          | Below 0.5x median |
| 209544_at       | receptor-interacting serine-threonine kinase 2                                          | 0.49                                                          | Below 0.5x median |
| 219270_at       | ChaC, cation transport regulator homolog 1 (E. coli)                                    | 0.48                                                          | Below 0.5x median |
| 206023_at       | neuromedin U                                                                            | 0.48                                                          | Below 0.5x median |
| 205157_s_at     | keratin 17                                                                              | 0.48                                                          | Below 0.5x median |
| 211905_s_at     | integrin, beta 4                                                                        | 0.48                                                          | Below 0.5x median |
| 216470_x_at     | protease, serine, 1 (trypsin 1) / protease, serine, 2 (trypsin 2) / protease, serine, 3 | 0.48                                                          | Below 0.5x median |
| 205064_at       | small proline-rich protein 1B                                                           | 0.46                                                          | Below 0.5x median |
| 215918_s_at     | spectrin, beta, non-erythrocytic 1                                                      | 0.46                                                          | Below 0.5x median |
| 206686_at       | pyruvate dehydrogenase kinase, isozyme 1                                                | 0.44                                                          | Below 0.5x median |
| 219702_at       | placenta-specific 1                                                                     | 0.44                                                          | Below 0.5x median |
| 214967_at       | CDNA FLJ12055 fis, clone HEMBB1002049                                                   | 0.43                                                          | Below 0.5x median |
| 201820_at       | keratin 5                                                                               | 0.42                                                          | Below 0.5x median |
| 222269_at       | apolipoprotein O-like                                                                   | 0.42                                                          | Below 0.5x median |
| 217559_at       | ribosomal protein L10-like                                                              | 0.42                                                          | Below 0.5x median |
| 209646_x_at     | aldehyde dehydrogenase 1 family, member B1                                              | 0.42                                                          | Below 0.5x median |
| 205796_at       | t-complex 11 (mouse)-like 1                                                             | 0.41                                                          | Below 0.5x median |
| 203967_at       | cell division cycle 6 homolog (S. cerevisiae)                                           | 0.41                                                          | Below 0.5x median |
| 209652_s_at     | placental growth factor                                                                 | 0.41                                                          | Below 0.5x median |
| 209125_at       | keratin 6A                                                                              | 0.41                                                          | Below 0.5x median |
| 214126_at       | mitochondrial carrier triple repeat 1                                                   | 0.40                                                          | Below 0.5x median |
| 204420_at       | FOS-like antigen 1                                                                      | 0.39                                                          | Below 0.5x median |
| 207382_at       | tumor protein p63                                                                       | 0.39                                                          | Below 0.5x median |
| 201249_at       | solute carrier family 2 (facilitated glucose transporter), member 1                     | 0.39                                                          | Below 0.5x median |
| 207526_s_at     | interleukin 1 receptor-like 1                                                           | 0.39                                                          | Below 0.5x median |
| 215199_at       | caldesmon 1                                                                             | 0.38                                                          | Below 0.5x median |
| 219998_at       | galectin-related protein                                                                | 0.38                                                          | Below 0.5x median |
| 222309_at       | hypothetical LOC100506935                                                               | 0.38                                                          | Below 0.5x median |
| 219987_at       | Similar to Uncharacterized protein LP9056                                               | 0.38                                                          | Below 0.5x median |
| 203736_s_at     | PTPRF interacting protein, binding protein 1 (liprin beta 1)                            | 0.37                                                          | Below 0.5x median |
| 204455_at       | dystonin                                                                                | 0.37                                                          | Below 0.5x median |
| 207345_at       | follistatin                                                                             | 0.36                                                          | Below 0.5x median |
| 219936_s_at     | G protein-coupled receptor 87                                                           | 0.35                                                          | Below 0.5x median |



**Supplemental Gene List I. Airway Basal Cell Signature Genes Analyzed (cont. page 23)**

| <b>Probe ID</b> | <b>Gene name</b>                                                                       | <b>Median of normalized expression levels in lung adenoCa</b> |                   |
|-----------------|----------------------------------------------------------------------------------------|---------------------------------------------------------------|-------------------|
| 209631_s_at     | G protein-coupled receptor 37 (endothelin receptor type B-like)                        | 0.35                                                          | Below 0.5x median |
| 208425_s_at     | tetratricopeptide repeat, ankyrin repeat and coiled-coil containing 2                  | 0.34                                                          | Below 0.5x median |
| 205691_at       | synaptogyrin 3                                                                         | 0.34                                                          | Below 0.5x median |
| 214297_at       | chondroitin sulfate proteoglycan 4                                                     | 0.34                                                          | Below 0.5x median |
| 205429_s_at     | membrane protein, palmitoylated 6 (MAGUK p55 subfamily member 6)                       | 0.34                                                          | Below 0.5x median |
| 211846_s_at     | poliovirus receptor-related 1 (herpesvirus entry mediator C)                           | 0.33                                                          | Below 0.5x median |
| 220638_s_at     | Cas-Br-M (murine) ecotropic retroviral transforming sequence c                         | 0.33                                                          | Below 0.5x median |
| 208260_at       | arginine vasopressin receptor 1B                                                       | 0.33                                                          | Below 0.5x median |
| 204952_at       | LY6/PLAUR domain containing 3                                                          | 0.33                                                          | Below 0.5x median |
| 203184_at       | fibrillin 2                                                                            | 0.32                                                          | Below 0.5x median |
| 205899_at       | cyclin A1                                                                              | 0.32                                                          | Below 0.5x median |
| 205595_at       | desmoglein 3                                                                           | 0.32                                                          | Below 0.5x median |
| 208511_at       | pituitary tumor-transforming 3 (pseudogene)                                            | 0.31                                                          | Below 0.5x median |
| 206032_at       | desmocollin 3                                                                          | 0.31                                                          | Below 0.5x median |
| 202684_s_at     | RNA (guanine-7-) methyltransferase                                                     | 0.31                                                          | Below 0.5x median |
| 206371_at       | folate receptor 3 (gamma)                                                              | 0.31                                                          | Below 0.5x median |
| 209877_at       | synuclein, gamma (breast cancer-specific protein 1)                                    | 0.31                                                          | Below 0.5x median |
| 207717_s_at     | plakophilin 2                                                                          | 0.30                                                          | Below 0.5x median |
| 219555_s_at     | centromere protein N                                                                   | 0.30                                                          | Below 0.5x median |
| 221414_s_at     | defensin, beta 126                                                                     | 0.30                                                          | Below 0.5x median |
| 219926_at       | popeye domain containing 3                                                             | 0.30                                                          | Below 0.5x median |
| 210113_s_at     | NLR family, pyrin domain containing 1                                                  | 0.29                                                          | Below 0.5x median |
| 220058_at       | chromosome 17 open reading frame 39                                                    | 0.29                                                          | Below 0.5x median |
| 217553_at       | STEAP family protein MGC87042                                                          | 0.28                                                          | Below 0.5x median |
| 206832_s_at     | sema domain, immunoglobulin domain (Ig), short basic domain, secreted, (semaphorin) 3F | 0.28                                                          | Below 0.5x median |
| 220198_s_at     | eukaryotic translation initiation factor 5A2                                           | 0.28                                                          | Below 0.5x median |
| 215058_at       | DENN/MADD domain containing 5B                                                         | 0.27                                                          | Below 0.5x median |
| 206080_at       | phospholipase C, eta 2                                                                 | 0.27                                                          | Below 0.5x median |
| 215465_at       | ATP-binding cassette, sub-family A (ABC1), member 12                                   | 0.26                                                          | Below 0.5x median |
| 205778_at       | kallikrein-related peptidase 7                                                         | 0.26                                                          | Below 0.5x median |
| 203438_at       | stanniocalcin 2                                                                        | 0.26                                                          | Below 0.5x median |
| 210138_at       | regulator of G-protein signaling 20                                                    | 0.26                                                          | Below 0.5x median |
| 219909_at       | matrix metalloproteinase 28                                                            | 0.26                                                          | Below 0.5x median |

**Supplemental Gene List I. Airway Basal Cell Signature Genes Analyzed (cont. page 24)**

| <b>Probe ID</b> | <b>Gene name</b>                                                                          | <b>Median of normalized expression levels in lung adenoCa</b> |                   |
|-----------------|-------------------------------------------------------------------------------------------|---------------------------------------------------------------|-------------------|
| 214240_at       | galanin prepropeptide                                                                     | 0.26                                                          | Below 0.5x median |
| 204560_at       | FK506 binding protein 5                                                                   | 0.25                                                          | Below 0.5x median |
| 205122_at       | transmembrane protein with EGF-like and two follistatin-like domains 1                    | 0.25                                                          | Below 0.5x median |
| 215074_at       | myosin IB                                                                                 | 0.25                                                          | Below 0.5x median |
| 221994_at       | PDZ and LIM domain 5                                                                      | 0.25                                                          | Below 0.5x median |
| 204614_at       | serpin peptidase inhibitor, clade B (ovalbumin), member 2                                 | 0.24                                                          | Below 0.5x median |
| 220484_at       | mucolipin 3                                                                               | 0.24                                                          | Below 0.5x median |
| 209792_s_at     | kallikrein-related peptidase 10                                                           | 0.24                                                          | Below 0.5x median |
| 209909_s_at     | transforming growth factor, beta 2                                                        | 0.24                                                          | Below 0.5x median |
| 219247_s_at     | zinc finger, DHHC-type containing 14                                                      | 0.23                                                          | Below 0.5x median |
| 206091_at       | matrilin 3                                                                                | 0.23                                                          | Below 0.5x median |
| 210233_at       | interleukin 1 receptor accessory protein                                                  | 0.23                                                          | Below 0.5x median |
| 205827_at       | cholecystokinin                                                                           | 0.22                                                          | Below 0.5x median |
| 214078_at       | p21 protein (Cdc42/Rac)-activated kinase 3                                                | 0.22                                                          | Below 0.5x median |
| 220431_at       | transmembrane protease, serine 11E                                                        | 0.22                                                          | Below 0.5x median |
| 210248_at       | wingless-type MMTV integration site family, member 7A                                     | 0.21                                                          | Below 0.5x median |
| 220685_at       | family with sequence similarity 120C                                                      | 0.21                                                          | Below 0.5x median |
| 210286_s_at     | solute carrier family 4, sodium bicarbonate cotransporter, member 7                       | 0.21                                                          | Below 0.5x median |
| 206172_at       | interleukin 13 receptor, alpha 2                                                          | 0.21                                                          | Below 0.5x median |
| 218602_s_at     | HAUS augmin-like complex, subunit 6                                                       | 0.21                                                          | Below 0.5x median |
| 208231_at       | neuregulin 1                                                                              | 0.20                                                          | Below 0.5x median |
| 205830_at       | calmegin                                                                                  | 0.20                                                          | Below 0.5x median |
| 205767_at       | epiregulin                                                                                | 0.20                                                          | Below 0.5x median |
| 220362_at       | psoriasis susceptibility 1 candidate 1                                                    | 0.20                                                          | Below 0.5x median |
| 206581_at       | basonuclin 1                                                                              | 0.20                                                          | Below 0.5x median |
| 204422_s_at     | fibroblast growth factor 2 (basic)                                                        | 0.19                                                          | Below 0.5x median |
| 204818_at       | hydroxysteroid (17-beta) dehydrogenase 2                                                  | 0.19                                                          | Below 0.5x median |
| 218964_at       | AT rich interactive domain 3B (BRIGHT-like)                                               | 0.18                                                          | Below 0.5x median |
| 220102_at       | forkhead box L2                                                                           | 0.18                                                          | Below 0.5x median |
| 205493_s_at     | dihydropyrimidinase-like 4                                                                | 0.18                                                          | Below 0.5x median |
| 214521_at       | hairy and enhancer of split 2 (Drosophila)                                                | 0.17                                                          | Below 0.5x median |
| 220214_at       | zinc finger protein 215                                                                   | 0.17                                                          | Below 0.5x median |
| 210654_at       | tumor necrosis factor receptor superfamily, member 10d, decoy with truncated death domain | 0.17                                                          | Below 0.5x median |
| 210355_at       | parathyroid hormone-like hormone                                                          | 0.16                                                          | Below 0.5x median |
| 220672_at       | protein phosphatase 4, regulatory subunit 4                                               | 0.16                                                          | Below 0.5x median |

**Supplemental Gene List I. Airway Basal Cell Signature Genes Analyzed (cont. page 25)**

| <b>Probe ID</b> | <b>Gene name</b>                                                                                                                                      | <b>Median of normalized expression levels in lung adenoCa</b> |                   |
|-----------------|-------------------------------------------------------------------------------------------------------------------------------------------------------|---------------------------------------------------------------|-------------------|
| 222265_at       | tensin 4                                                                                                                                              | 0.16                                                          | Below 0.5x median |
| 212821_at       | pleckstrin homology domain containing, family G (with RhoGef domain) member 3                                                                         | 0.15                                                          | Below 0.5x median |
| 219550_at       | roundabout, axon guidance receptor, homolog 3 (Drosophila)                                                                                            | 0.15                                                          | Below 0.5x median |
| 209800_at       | keratin 16                                                                                                                                            | 0.15                                                          | Below 0.5x median |
| 219855_at       | nudix (nucleoside diphosphate linked moiety X)-type motif 11                                                                                          | 0.14                                                          | Below 0.5x median |
| 206307_s_at     | forkhead box D1                                                                                                                                       | 0.14                                                          | Below 0.5x median |
| 210244_at       | cathelicidin antimicrobial peptide                                                                                                                    | 0.13                                                          | Below 0.5x median |
| 207017_at       | RAB27B, member RAS oncogene family                                                                                                                    | 0.13                                                          | Below 0.5x median |
| 204726_at       | cadherin 13, H-cadherin (heart)                                                                                                                       | 0.13                                                          | Below 0.5x median |
| 210587_at       | inhibin, beta E                                                                                                                                       | 0.12                                                          | Below 0.5x median |
| 202235_at       | solute carrier family 16, member 1 (monocarboxylic acid transporter 1)                                                                                | 0.12                                                          | Below 0.5x median |
| 221291_at       | UL16 binding protein 2                                                                                                                                | 0.12                                                          | Below 0.5x median |
| 216564_at       | similar to Argininosuccinate synthase (Citrulline--aspartate ligase)                                                                                  | 0.12                                                          | Below 0.5x median |
| 218990_s_at     | small proline-rich protein 3                                                                                                                          | 0.12                                                          | Below 0.5x median |
| 204411_at       | kinesin family member 21B                                                                                                                             | 0.12                                                          | Below 0.5x median |
| 203331_s_at     | inositol polyphosphate-5-phosphatase, 145kDa                                                                                                          | 0.12                                                          | Below 0.5x median |
| 210237_at       | Artemin                                                                                                                                               | 0.12                                                          | Below 0.5x median |
| 204760_s_at     | nuclear receptor subfamily 1, group D, member 1 /// thyroid hormone receptor, alpha (erythroblastic leukemia viral (v-erb-a) oncogene homolog, avian) | 0.11                                                          | Below 0.5x median |
| 213865_at       | discoidin, CUB and LCCL domain containing 2                                                                                                           | 0.11                                                          | Below 0.5x median |
| 204855_at       | serpin peptidase inhibitor, clade B (ovalbumin), member 5                                                                                             | 0.10                                                          | Below 0.5x median |
| 206400_at       | lectin, galactoside-binding, soluble, 7 / lectin, galactoside-binding, soluble, 7B                                                                    | 0.10                                                          | Below 0.5x median |
| 206569_at       | interleukin 24                                                                                                                                        | 0.10                                                          | Below 0.5x median |
| 202755_s_at     | glypican 1                                                                                                                                            | 0.09                                                          | Below 0.5x median |
| 219930_at       | Kruppel-like factor 8                                                                                                                                 | 0.09                                                          | Below 0.5x median |
| 213201_s_at     | troponin T type 1 (skeletal, slow)                                                                                                                    | 0.09                                                          | Below 0.5x median |
| 206354_at       | solute carrier organic anion transporter family, member 1B3                                                                                           | 0.08                                                          | Below 0.5x median |
| 208539_x_at     | small proline-rich protein 2B                                                                                                                         | 0.08                                                          | Below 0.5x median |
| 205460_at       | neuronal PAS domain protein 2                                                                                                                         | 0.08                                                          | Below 0.5x median |
| 220289_s_at     | absent in melanoma 1-like                                                                                                                             | 0.08                                                          | Below 0.5x median |
| 204636_at       | collagen, type XVII, alpha 1                                                                                                                          | 0.07                                                          | Below 0.5x median |

**Supplemental Gene List I. Airway Basal Cell Signature Genes Analyzed (cont. page 26)**

| <b>Probe ID</b> | <b>Gene name</b>                                                                                 | <b>Median of normalized expression levels in lung adenoCa</b> |                   |
|-----------------|--------------------------------------------------------------------------------------------------|---------------------------------------------------------------|-------------------|
| 206122_at       | SRY (sex determining region Y)-box 15                                                            | 0.07                                                          | Below 0.5x median |
| 220620_at       | cysteine-rich C-terminal 1                                                                       | 0.06                                                          | Below 0.5x median |
| 221784_at       | widely interspaced zinc finger motifs                                                            | 0.06                                                          | Below 0.5x median |
| 219532_at       | elongation of very long chain fatty acids (FEN1/Elo2, SUR4/Elo3, yeast)-like 4                   | 0.06                                                          | Below 0.5x median |
| 206877_at       | MAX dimerization protein 1                                                                       | 0.06                                                          | Below 0.5x median |
| 206421_s_at     | serpin peptidase inhibitor, clade B (ovalbumin), member 7                                        | 0.05                                                          | Below 0.5x median |
| 221854_at       | plakophilin 1 (ectodermal dysplasia/skin fragility syndrome)                                     | 0.05                                                          | Below 0.5x median |
| 207302_at       | sarcoglycan, gamma (35kDa dystrophin-associated glycoprotein)                                    | 0.05                                                          | Below 0.5x median |
| 214595_at       | potassium voltage-gated channel, subfamily G, member 1                                           | 0.05                                                          | Below 0.5x median |
| 213796_at       | small proline-rich protein 1A                                                                    | 0.05                                                          | Below 0.5x median |
| 207080_s_at     | peptide YY                                                                                       | 0.05                                                          | Below 0.5x median |
| 219554_at       | Rh family, C glycoprotein                                                                        | 0.04                                                          | Below 0.5x median |
| 215729_s_at     | vestigial like 1 (Drosophila)                                                                    | 0.04                                                          | Below 0.5x median |
| 219601_s_at     | chromosome 10 open reading frame 12                                                              | 0.04                                                          | Below 0.5x median |
| 206008_at       | transglutaminase 1 (K polypeptide epidermal type I, protein-glutamine-gamma-glutamyltransferase) | 0.04                                                          | Below 0.5x median |
| 222383_s_at     | arachidonate lipoxygenase 3                                                                      | 0.04                                                          | Below 0.5x median |
| 206969_at       | keratin 34                                                                                       | 0.03                                                          | Below 0.5x median |
| 205138_s_at     | uronyl-2-sulfotransferase                                                                        | 0.03                                                          | Below 0.5x median |
| 206866_at       | cadherin 4, type 1, R-cadherin (retinal)                                                         | 0.03                                                          | Below 0.5x median |
| 220664_at       | small proline-rich protein 2C (pseudogene)                                                       | 0.03                                                          | Below 0.5x median |
| 206376_at       | solute carrier family 6 (neutral amino acid transporter), member 15                              | 0.02                                                          | Below 0.5x median |

**Supplemental Gene List II. Airway Non-basal Cell Signature Genes Analyzed**

| <b>Probe ID</b> | <b>Gene name</b>                                                                                                                       | <b>Median of normalized expression levels in lung adenoCa</b> |                 |
|-----------------|----------------------------------------------------------------------------------------------------------------------------------------|---------------------------------------------------------------|-----------------|
| 208306_x_at     | Major histocompatibility complex, class II, DR beta 3                                                                                  | 90.73                                                         | Above 2x median |
| 208894_at       | major histocompatibility complex, class II, DR alpha                                                                                   | 64.23                                                         | Above 2x median |
| 217757_at       | alpha-2-macroglobulin                                                                                                                  | 45.84                                                         | Above 2x median |
| 201137_s_at     | major histocompatibility complex, class II, DP beta 1                                                                                  | 29.14                                                         | Above 2x median |
| 217767_at       | complement component 3                                                                                                                 | 28.17                                                         | Above 2x median |
| 211991_s_at     | major histocompatibility complex, class II, DP alpha 1                                                                                 | 25.16                                                         | Above 2x median |
| 213975_s_at     | lysozyme (renal amyloidosis) ; leukocyte immunoglobulin-like receptor, subfamily B (with TM and ITIM domains), member 1                | 23.65                                                         | Above 2x median |
| 202291_s_at     | matrix Gla protein                                                                                                                     | 23.48                                                         | Above 2x median |
| 201288_at       | Rho GDP dissociation inhibitor (GDI) beta                                                                                              | 22.68                                                         | Above 2x median |
| 203892_at       | WAP four-disulfide core domain 2                                                                                                       | 22.46                                                         | Above 2x median |
| 202833_s_at     | serpin peptidase inhibitor, clade A (alpha-1 antiproteinase, antitrypsin), member 1                                                    | 21.44                                                         | Above 2x median |
| 218211_s_at     | melanophilin                                                                                                                           | 20.57                                                         | Above 2x median |
| 204124_at       | solute carrier family 34 (sodium phosphate), member 2                                                                                  | 19.17                                                         | Above 2x median |
| 202017_at       | epoxide hydrolase 1, microsomal (xenobiotic)                                                                                           | 18.82                                                         | Above 2x median |
| 202411_at       | interferon, alpha-inducible protein 27                                                                                                 | 18.17                                                         | Above 2x median |
| 217478_s_at     | major histocompatibility complex, class II, DM alpha                                                                                   | 17.85                                                         | Above 2x median |
| 209118_s_at     | tubulin, alpha 3                                                                                                                       | 17.46                                                         | Above 2x median |
| 200795_at       | SPARC-like 1 (mast9, hevin)                                                                                                            | 16.43                                                         | Above 2x median |
| 208998_at       | uncoupling protein 2 (mitochondrial, proton carrier)                                                                                   | 15.61                                                         | Above 2x median |
| 204437_s_at     | folate receptor 1 (adult)                                                                                                              | 15.38                                                         | Above 2x median |
| 211959_at       | insulin-like growth factor binding protein 5                                                                                           | 11.93                                                         | Above 2x median |
| 203416_at       | CD53 antigen                                                                                                                           | 11.46                                                         | Above 2x median |
| 214433_s_at     | selenium binding protein 1 ; selenium binding protein 1                                                                                | 11.38                                                         | Above 2x median |
| 217414_x_at     | hemoglobin, alpha 2                                                                                                                    | 11.26                                                         | Above 2x median |
| 212950_at       | G protein-coupled receptor 116                                                                                                         | 10.82                                                         | Above 2x median |
| 220532_s_at     | LR8 protein                                                                                                                            | 10.24                                                         | Above 2x median |
| 209116_x_at     | hemoglobin, beta ; hemoglobin, beta                                                                                                    | 9.23                                                          | Above 2x median |
| 204070_at       | retinoic acid receptor responder (tazarotene induced) 3                                                                                | 8.94                                                          | Above 2x median |
| 217989_at       | dehydrogenase/reductase (SDR family) member 8                                                                                          | 8.42                                                          | Above 2x median |
| 208791_at       | clusterin (complement lysis inhibitor, SP-40,40, sulfated glycoprotein 2, testosterone-repressed prostate message 2, apolipoprotein J) | 8.13                                                          | Above 2x median |
| 39249_at        | aquaporin 3                                                                                                                            | 8.06                                                          | Above 2x median |
| 207761_s_at     | DKFZP586A0522 protein                                                                                                                  | 7.63                                                          | Above 2x median |

**Supplemental Gene List II. Airway Non-basal Cell Signature Genes Analyzed  
(cont. page 2)**

| <b>Probe ID</b> | <b>Gene name</b>                                                                                                                                                        | <b>Median of normalized expression levels in lung adenoCa</b> |                 |
|-----------------|-------------------------------------------------------------------------------------------------------------------------------------------------------------------------|---------------------------------------------------------------|-----------------|
| 203799_at       | CD302 antigen                                                                                                                                                           | 7.25                                                          | Above 2x median |
| 204174_at       | arachidonate 5-lipoxygenase-activating protein                                                                                                                          | 6.98                                                          | Above 2x median |
| 204846_at       | ceruloplasmin (ferroxidase)                                                                                                                                             | 6.97                                                          | Above 2x median |
| 201641_at       | bone marrow stromal cell antigen 2                                                                                                                                      | 6.79                                                          | Above 2x median |
| 205081_at       | cysteine-rich protein 1 (intestinal)                                                                                                                                    | 6.56                                                          | Above 2x median |
| 209392_at       | ectonucleotide pyrophosphatase/phosphodiesterase 2 (autotaxin)                                                                                                          | 6.38                                                          | Above 2x median |
| 203854_at       | I factor (complement)                                                                                                                                                   | 6.25                                                          | Above 2x median |
| 212588_at       | protein tyrosine phosphatase, receptor type, C                                                                                                                          | 5.87                                                          | Above 2x median |
| 203758_at       | cathepsin O                                                                                                                                                             | 5.70                                                          | Above 2x median |
| 209568_s_at     | ral guanine nucleotide dissociation stimulator-like 1                                                                                                                   | 5.62                                                          | Above 2x median |
| 208885_at       | lymphocyte cytosolic protein 1 (L-plastin)                                                                                                                              | 5.51                                                          | Above 2x median |
| 219666_at       | membrane-spanning 4-domains, subfamily A, member 6A                                                                                                                     | 5.37                                                          | Above 2x median |
| 202086_at       | myxovirus (influenza virus) resistance 1, interferon-inducible protein p78 (mouse) ; myxovirus (influenza virus) resistance 1, interferon-inducible protein p78 (mouse) | 5.37                                                          | Above 2x median |
| 222125_s_at     | hypoxia-inducible factor prolyl 4-hydroxylase                                                                                                                           | 5.27                                                          | Above 2x median |
| 209108_at       | tetraspanin 6                                                                                                                                                           | 5.26                                                          | Above 2x median |
| 205890_s_at     | ubiquitin D                                                                                                                                                             | 5.26                                                          | Above 2x median |
| 213059_at       | cAMP responsive element binding protein 3-like 1                                                                                                                        | 5.24                                                          | Above 2x median |
| 210096_at       | cytochrome P450, family 4, subfamily B, polypeptide 1                                                                                                                   | 5.22                                                          | Above 2x median |
| 203824_at       | tetraspanin 8                                                                                                                                                           | 5.13                                                          | Above 2x median |
| 203915_at       | chemokine (C-X-C motif) ligand 9                                                                                                                                        | 4.75                                                          | Above 2x median |
| 212353_at       | sulfatase 1                                                                                                                                                             | 4.58                                                          | Above 2x median |
| 218454_at       | hypothetical protein FLJ22662                                                                                                                                           | 4.53                                                          | Above 2x median |
| 204646_at       | dihydropyrimidine dehydrogenase                                                                                                                                         | 4.51                                                          | Above 2x median |
| 202357_s_at     | B-factor, properdin                                                                                                                                                     | 4.41                                                          | Above 2x median |
| 205798_at       | interleukin 7 receptor                                                                                                                                                  | 4.30                                                          | Above 2x median |
| 205725_at       | secretoglobin, family 1A, member 1 (uteroglobin)                                                                                                                        | 3.95                                                          | Above 2x median |
| 203953_s_at     | claudin 3                                                                                                                                                               | 3.82                                                          | Above 2x median |
| 210272_at       | cytochrome P450, family 2, subfamily B, polypeptide 7 pseudogene 1                                                                                                      | 3.79                                                          | Above 2x median |
| 211596_s_at     | leucine-rich repeats and immunoglobulin-like domains 1                                                                                                                  | 3.74                                                          | Above 2x median |
| 204160_s_at     | ectonucleotide pyrophosphatase/phosphodiesterase 4 (putative function)                                                                                                  | 3.53                                                          | Above 2x median |
| 205313_at       | transcription factor 2, hepatic; LF-B3; variant hepatic nuclear factor                                                                                                  | 3.53                                                          | Above 2x median |

**Supplemental Gene List II. Airway Non-basal Cell Signature Genes Analyzed  
(cont. page 3)**

| <b>Probe ID</b> | <b>Gene name</b>                                                                                                                                                                | <b>Median of normalized expression levels in lung adenoCa</b> |                 |
|-----------------|---------------------------------------------------------------------------------------------------------------------------------------------------------------------------------|---------------------------------------------------------------|-----------------|
| 209355_s_at     | phosphatidic acid phosphatase type 2B                                                                                                                                           | 3.49                                                          | Above 2x median |
| 209616_s_at     | carboxylesterase 1 (monocyte/macrophage serine esterase 1)                                                                                                                      | 3.47                                                          | Above 2x median |
| 218729_at       | latexin                                                                                                                                                                         | 3.45                                                          | Above 2x median |
| 206385_s_at     | ankyrin 3, node of Ranvier (ankyrin G)                                                                                                                                          | 3.44                                                          | Above 2x median |
| 214453_s_at     | interferon-induced protein 44                                                                                                                                                   | 3.43                                                          | Above 2x median |
| 212224_at       | aldehyde dehydrogenase 1 family, member A1                                                                                                                                      | 3.42                                                          | Above 2x median |
| 211796_s_at     | T cell receptor beta variable 21-1 ; T cell receptor beta variable 19 ; T cell receptor beta variable 5-4 ; T cell receptor beta variable 3-1 ; T cell receptor beta constant 1 | 3.40                                                          | Above 2x median |
| 205831_at       | CD2 antigen (p50), sheep red blood cell receptor                                                                                                                                | 3.37                                                          | Above 2x median |
| 34210_at        | CD52 antigen (CAMPATH-1 antigen)                                                                                                                                                | 3.36                                                          | Above 2x median |
| 218901_at       | phospholipid scramblase 4                                                                                                                                                       | 3.36                                                          | Above 2x median |
| 210972_x_at     | T cell receptor alpha locus ; T cell receptor delta variable 2 ; T cell receptor alpha variable 20 ; T cell receptor alpha joining 17 ; T cell receptor alpha constant          | 3.36                                                          | Above 2x median |
| 211548_s_at     | hydroxyprostaglandin dehydrogenase 15-(NAD)                                                                                                                                     | 3.31                                                          | Above 2x median |
| 205776_at       | flavin containing monooxygenase 5                                                                                                                                               | 3.29                                                          | Above 2x median |
| 203547_at       | CD4 antigen (p55)                                                                                                                                                               | 3.24                                                          | Above 2x median |
| 205489_at       | crystallin, mu                                                                                                                                                                  | 3.23                                                          | Above 2x median |
| 205206_at       | Kallmann syndrome 1 sequence                                                                                                                                                    | 3.20                                                          | Above 2x median |
| 205597_at       | solute carrier family 44, member 4                                                                                                                                              | 3.18                                                          | Above 2x median |
| 203088_at       | fibulin 5                                                                                                                                                                       | 3.13                                                          | Above 2x median |
| 213539_at       | CD3D antigen, delta polypeptide (TiT3 complex)                                                                                                                                  | 3.09                                                          | Above 2x median |
| 207808_s_at     | protein S (alpha)                                                                                                                                                               | 3.04                                                          | Above 2x median |
| 202743_at       | phosphoinositide-3-kinase, regulatory subunit 3 (p55, gamma)                                                                                                                    | 3.03                                                          | Above 2x median |
| 221872_at       | retinoic acid receptor responder (tazarotene induced) 1                                                                                                                         | 2.97                                                          | Above 2x median |
| 209670_at       | T cell receptor alpha constant                                                                                                                                                  | 2.97                                                          | Above 2x median |
| 212148_at       | Pre-B-cell leukemia transcription factor 1                                                                                                                                      | 2.96                                                          | Above 2x median |
| 203561_at       | Fc fragment of IgG, low affinity IIa, receptor (CD32)                                                                                                                           | 2.95                                                          | Above 2x median |
| 202947_s_at     | glycophorin C (Gerbich blood group)                                                                                                                                             | 2.93                                                          | Above 2x median |
| 211742_s_at     | ecotropic viral integration site 2B                                                                                                                                             | 2.92                                                          | Above 2x median |
| 221698_s_at     | C-type lectin domain family 7, member A                                                                                                                                         | 2.90                                                          | Above 2x median |
| 209447_at       | spectrin repeat containing, nuclear envelope 1                                                                                                                                  | 2.89                                                          | Above 2x median |
| 218805_at       | GTPase, IMAP family member 5                                                                                                                                                    | 2.89                                                          | Above 2x median |
| 219014_at       | placenta-specific 8                                                                                                                                                             | 2.83                                                          | Above 2x median |
| 218885_s_at     | UDP-N-acetyl-alpha-D-galactosamine:polypeptide N-                                                                                                                               | 2.78                                                          | Above 2x median |

**Supplemental Gene List II. Airway Non-basal Cell Signature Genes Analyzed**  
(cont. page 4)

| <b>Probe ID</b> | <b>Gene name</b>                                                                                                                                                                                                 | <b>Median of normalized expression levels in lung adenoCa</b> |                 |
|-----------------|------------------------------------------------------------------------------------------------------------------------------------------------------------------------------------------------------------------|---------------------------------------------------------------|-----------------|
| 208498_s_at     | acetylgalactosaminyltransferase 12 (GalNAc-T12)<br>amylase, alpha 1A; salivary ; amylase, alpha 1B; salivary ;<br>amylase, alpha 1C; salivary ; amylase, alpha 2A;<br>pancreatic ; amylase, alpha 2B; pancreatic | 2.73                                                          | Above 2x median |
| 213566_at       | ribonuclease, RNase A family, k6                                                                                                                                                                                 | 2.58                                                          | Above 2x median |
| 203153_at       | interferon-induced protein with tetratricopeptide repeats 1 ;<br>interferon-induced protein with tetratricopeptide repeats 1                                                                                     | 2.49                                                          | Above 2x median |
| 213106_at       | ATPase, aminophospholipid transporter (APLT), Class I,<br>type 8A, member 1                                                                                                                                      | 2.44                                                          | Above 2x median |
| 202018_s_at     | lactotransferrin                                                                                                                                                                                                 | 2.42                                                          | Above 2x median |
| 205158_at       | ribonuclease, RNase A family, 4                                                                                                                                                                                  | 2.41                                                          | Above 2x median |
| 204502_at       | SAM domain and HD domain 1                                                                                                                                                                                       | 2.32                                                          | Above 2x median |
| 208146_s_at     | carboxypeptidase, vitellogenic-like ; carboxypeptidase,<br>vitellogenic-like                                                                                                                                     | 2.29                                                          | Above 2x median |
| 204774_at       | ecotropic viral integration site 2A                                                                                                                                                                              | 2.24                                                          | Above 2x median |
| 205668_at       | lymphocyte antigen 75                                                                                                                                                                                            | 2.21                                                          | Above 2x median |
| 204103_at       | chemokine (C-C motif) ligand 4                                                                                                                                                                                   | 2.19                                                          | Above 2x median |
| 204972_at       | 2'-5'-oligoadenylate synthetase 2, 69/71kDa                                                                                                                                                                      | 2.16                                                          | Above 2x median |
| 218584_at       | hypothetical protein FLJ21127                                                                                                                                                                                    | 2.16                                                          | Above 2x median |
| 205392_s_at     | chemokine (C-C motif) ligand 14 ; chemokine (C-C motif)<br>ligand 15                                                                                                                                             | 2.14                                                          | Above 2x median |
| 213733_at       | myosin IF                                                                                                                                                                                                        | 2.10                                                          | Above 2x median |
| 220330_s_at     | SAM domain, SH3 domain and nuclear localisation<br>signals, 1                                                                                                                                                    | 2.10                                                          | Above 2x median |
| 203908_at       | solute carrier family 4, sodium bicarbonate cotransporter,<br>member 4                                                                                                                                           | 2.08                                                          | Above 2x median |
| 221087_s_at     | apolipoprotein L, 3                                                                                                                                                                                              | 2.06                                                          | Above 2x median |
| 221530_s_at     | basic helix-loop-helix domain containing, class B, 3                                                                                                                                                             | 2.06                                                          | Above 2x median |
| 209539_at       | Rac/Cdc42 guanine nucleotide exchange factor (GEF) 6                                                                                                                                                             | 2.03                                                          | Above 2x median |
| 217109_at       | mucin 4, tracheobronchial                                                                                                                                                                                        | 2.02                                                          | Above 2x median |
| 214719_at       | hypothetical protein LOC283537                                                                                                                                                                                   | 2.02                                                          | Above 2x median |
| 204220_at       | glia maturation factor, gamma                                                                                                                                                                                    | 2.01                                                          | Above 2x median |
| 207222_at       | phospholipase A2, group X                                                                                                                                                                                        | 1.99                                                          |                 |
| 204576_s_at     | clusterin associated protein 1                                                                                                                                                                                   | 1.99                                                          |                 |
| 203236_s_at     | lectin, galactoside-binding, soluble, 9 (galectin 9)                                                                                                                                                             | 1.97                                                          |                 |
| 214440_at       | N-acetyltransferase 1 (arylamine N-acetyltransferase)                                                                                                                                                            | 1.94                                                          |                 |
| 208920_at       | sorcin                                                                                                                                                                                                           | 1.94                                                          |                 |
| 210166_at       | toll-like receptor 5                                                                                                                                                                                             | 1.93                                                          |                 |



**Supplemental Gene List II. Airway Non-basal Cell Signature Genes Analyzed  
(cont. page 5)**

| <b>Probe ID</b> | <b>Gene name</b>                                                                     | <b>Median of normalized expression levels in lung adenoCa</b> |
|-----------------|--------------------------------------------------------------------------------------|---------------------------------------------------------------|
| 204703_at       | tetratricopeptide repeat domain 10                                                   | 1.90                                                          |
| 213488_at       | sushi, nidogen and EGF-like domains 1                                                | 1.88                                                          |
| 205997_at       | ADAM metallopeptidase domain 28                                                      | 1.87                                                          |
| 209200_at       | MADS box transcription enhancer factor 2, polypeptide C (myocyte enhancer factor 2C) | 1.87                                                          |
| 205364_at       | acyl-Coenzyme A oxidase 2, branched chain                                            | 1.87                                                          |
| 205258_at       | inhibin, beta B (activin AB beta polypeptide)                                        | 1.87                                                          |
| 205590_at       | RAS guanyl releasing protein 1 (calcium and DAG-regulated)                           | 1.87                                                          |
| 207191_s_at     | immunoglobulin superfamily containing leucine-rich repeat                            | 1.84                                                          |
| 206932_at       | cholesterol 25-hydroxylase                                                           | 1.83                                                          |
| 209606_at       | pleckstrin homology, Sec7 and coiled-coil domains, binding protein                   | 1.81                                                          |
| 218437_s_at     | leucine zipper transcription factor-like 1                                           | 1.80                                                          |
| 204788_s_at     | protoporphyrinogen oxidase                                                           | 1.80                                                          |
| 205640_at       | aldehyde dehydrogenase 3 family, member B1                                           | 1.79                                                          |
| 205114_s_at     | chemokine (C-C motif) ligand 3 ; chemokine (C-C motif) ligand 3-like 1               | 1.79                                                          |
| 205464_at       | sodium channel, nonvoltage-gated 1, beta (Liddle syndrome)                           | 1.78                                                          |
| 212603_at       | mitochondrial ribosomal protein S31                                                  | 1.73                                                          |
| 203523_at       | lymphocyte-specific protein 1                                                        | 1.73                                                          |
| 205692_s_at     | CD38 antigen (p45)                                                                   | 1.72                                                          |
| 205316_at       | Solute carrier family 15 (H <sup>+</sup> /peptide transporter), member 2             | 1.72                                                          |
| 203151_at       | microtubule-associated protein 1A                                                    | 1.72                                                          |
| 206991_s_at     | chemokine (C-C motif) receptor 5                                                     | 1.69                                                          |
| 211902_x_at     | T cell receptor alpha locus                                                          | 1.69                                                          |
| 203708_at       | phosphodiesterase 4B, cAMP-specific (phosphodiesterase E4 dunce homolog, Drosophila) | 1.69                                                          |
| 218599_at       | REC8-like 1 (yeast)                                                                  | 1.68                                                          |
| 211685_s_at     | neurocalcin delta                                                                    | 1.64                                                          |
| 209504_s_at     | pleckstrin homology domain containing, family B (evectins) member 1                  | 1.63                                                          |
| 206765_at       | potassium inwardly-rectifying channel, subfamily J, member 2                         | 1.63                                                          |
| 213317_at       | Chloride intracellular channel 5                                                     | 1.62                                                          |
| 221188_s_at     | cell death-inducing DFFA-like effector b                                             | 1.62                                                          |

**Supplemental Gene List II. Airway Non-basal Cell Signature Genes Analyzed  
(cont. page 6)**

| <b>Probe ID</b> | <b>Gene name</b>                                                                                                                                                                                                                                        | <b>Median of normalized expression levels in lung adenoCa</b> |
|-----------------|---------------------------------------------------------------------------------------------------------------------------------------------------------------------------------------------------------------------------------------------------------|---------------------------------------------------------------|
| 204179_at       | myoglobin                                                                                                                                                                                                                                               | 1.62                                                          |
| 52975_at        | chromosome 9 open reading frame 28                                                                                                                                                                                                                      | 1.62                                                          |
| 203413_at       | NEL-like 2 (chicken) ; NEL-like 2 (chicken)                                                                                                                                                                                                             | 1.60                                                          |
| 220173_at       | chromosome 14 open reading frame 45                                                                                                                                                                                                                     | 1.59                                                          |
| 219243_at       | GTPase, IMAP family member 4                                                                                                                                                                                                                            | 1.58                                                          |
| 204202_at       | IQ motif containing E                                                                                                                                                                                                                                   | 1.56                                                          |
| 203924_at       | glutathione S-transferase A1                                                                                                                                                                                                                            | 1.55                                                          |
| 204964_s_at     | sarcospan (Kras oncogene-associated gene)                                                                                                                                                                                                               | 1.53                                                          |
| 218999_at       | hypothetical protein FLJ11000                                                                                                                                                                                                                           | 1.51                                                          |
| 203474_at       | IQ motif containing GTPase activating protein 2                                                                                                                                                                                                         | 1.51                                                          |
| 203979_at       | cytochrome P450, family 27, subfamily A, polypeptide 1                                                                                                                                                                                                  | 1.51                                                          |
| 221558_s_at     | lymphoid enhancer-binding factor 1                                                                                                                                                                                                                      | 1.50                                                          |
| 220751_s_at     | chromosome 5 open reading frame 4                                                                                                                                                                                                                       | 1.50                                                          |
| 219602_s_at     | family with sequence similarity 38, member B                                                                                                                                                                                                            | 1.49                                                          |
| 216920_s_at     | T cell receptor gamma constant 2 ; T cell receptor gamma variable 9 ; similar to T-cell receptor gamma chain C region PT-gamma-1/2 ; similar to T-cell receptor gamma chain V region PT-gamma-1/2 precursor ; TCR gamma alternate reading frame protein | 1.48                                                          |
| 205758_at       | CD8 antigen, alpha polypeptide (p32)                                                                                                                                                                                                                    | 1.45                                                          |
| 215783_s_at     | alkaline phosphatase, liver/bone/kidney                                                                                                                                                                                                                 | 1.45                                                          |
| 211003_x_at     | transglutaminase 2 (C polypeptide, protein-glutamine-gamma-glutamyltransferase)                                                                                                                                                                         | 1.45                                                          |
| 211581_x_at     | leukocyte specific transcript 1                                                                                                                                                                                                                         | 1.44                                                          |
| 219542_at       | NIMA (never in mitosis gene a)- related kinase 11                                                                                                                                                                                                       | 1.42                                                          |
| 204304_s_at     | prominin 1                                                                                                                                                                                                                                              | 1.42                                                          |
| 218820_at       | chromosome 14 open reading frame 132                                                                                                                                                                                                                    | 1.41                                                          |
| 220072_at       | centrosome and spindle pole associated protein 1                                                                                                                                                                                                        | 1.38                                                          |
| 219478_at       | WAP four-disulfide core domain 1                                                                                                                                                                                                                        | 1.38                                                          |
| 219182_at       | carbohydrate (N-acetylglucosamine 6-O) sulfotransferase 5                                                                                                                                                                                               | 1.36                                                          |
| 203951_at       | calponin 1, basic, smooth muscle                                                                                                                                                                                                                        | 1.34                                                          |
| 212415_at       | septin 6                                                                                                                                                                                                                                                | 1.33                                                          |
| 203687_at       | chemokine (C-X3-C motif) ligand 1                                                                                                                                                                                                                       | 1.33                                                          |
| 205894_at       | arylsulfatase E (chondrodysplasia punctata 1)                                                                                                                                                                                                           | 1.33                                                          |
| 213186_at       | zinc finger DAZ interacting protein 3                                                                                                                                                                                                                   | 1.32                                                          |
| 220306_at       | family with sequence similarity 46, member C                                                                                                                                                                                                            | 1.32                                                          |
| 222304_x_at     | olfactory receptor, family 7, subfamily E, member 47 pseudogene                                                                                                                                                                                         | 1.31                                                          |

**Supplemental Gene List II. Airway Non-basal Cell Signature Genes Analyzed  
(cont. page 7)**

| <b>Probe ID</b> | <b>Gene name</b>                                                                                                                                            | <b>Median of normalized expression levels in lung adenoCa</b> |
|-----------------|-------------------------------------------------------------------------------------------------------------------------------------------------------------|---------------------------------------------------------------|
| 38241_at        | butyrophilin, subfamily 3, member A3                                                                                                                        | 1.31                                                          |
| 205141_at       | angiogenin, ribonuclease, RNase A family, 5 ;<br>ribonuclease, RNase A family, 4                                                                            | 1.30                                                          |
| 214745_at       | phospholipase C-like 3                                                                                                                                      | 1.30                                                          |
| 213416_at       | integrin, alpha 4 (antigen CD49D, alpha 4 subunit of VLA-4 receptor)                                                                                        | 1.29                                                          |
| 204041_at       | monoamine oxidase B                                                                                                                                         | 1.27                                                          |
| 220108_at       | guanine nucleotide binding protein (G protein), alpha 14                                                                                                    | 1.25                                                          |
| 219799_s_at     | dehydrogenase/reductase (SDR family) member 9                                                                                                               | 1.25                                                          |
| 203680_at       | protein kinase, cAMP-dependent, regulatory, type II, beta                                                                                                   | 1.25                                                          |
| 211471_s_at     | RAB36, member RAS oncogene family                                                                                                                           | 1.24                                                          |
| 213784_at       | RAB, member of RAS oncogene family-like 4                                                                                                                   | 1.24                                                          |
| 204783_at       | Myeloid leukemia factor 1                                                                                                                                   | 1.22                                                          |
| 218218_at       | DIP13 beta                                                                                                                                                  | 1.22                                                          |
| 218789_s_at     | hypothetical protein FLJ20010                                                                                                                               | 1.20                                                          |
| 213432_at       | mucin 5, subtype B, tracheobronchial                                                                                                                        | 1.20                                                          |
| 220998_s_at     | unc-93 homolog B1 (C. elegans) ; unc-93 homolog B1 (C. elegans)                                                                                             | 1.20                                                          |
| 212805_at       | KIAA0367                                                                                                                                                    | 1.20                                                          |
| 205406_s_at     | sperm autoantigenic protein 17                                                                                                                              | 1.19                                                          |
| 203716_s_at     | dipeptidylpeptidase 4 (CD26, adenosine deaminase complexing protein 2)                                                                                      | 1.18                                                          |
| 205328_at       | claudin 10                                                                                                                                                  | 1.18                                                          |
| 205488_at       | granzyme A (granzyme 1, cytotoxic T-lymphocyte-associated serine esterase 3) ; granzyme A (granzyme 1, cytotoxic T-lymphocyte-associated serine esterase 3) | 1.17                                                          |
| 213429_at       | CDNA FLJ26539 fis, clone KDN09310                                                                                                                           | 1.17                                                          |
| 207069_s_at     | SMAD, mothers against DPP homolog 6 (Drosophila)                                                                                                            | 1.17                                                          |
| 212613_at       | butyrophilin, subfamily 3, member A2                                                                                                                        | 1.16                                                          |
| 203632_s_at     | G protein-coupled receptor, family C, group 5, member B                                                                                                     | 1.16                                                          |
| 205698_s_at     | mitogen-activated protein kinase kinase 6                                                                                                                   | 1.15                                                          |
| 215559_at       | ATP-binding cassette, sub-family C (CFTR/MRP), member 6                                                                                                     | 1.15                                                          |
| 220393_at       | glutamate-ammonia ligase (glutamine synthetase) domain containing 1                                                                                         | 1.14                                                          |
| 221879_at       | calmodulin-like 4                                                                                                                                           | 1.14                                                          |
| 205821_at       | killer cell lectin-like receptor subfamily K, member 1                                                                                                      | 1.13                                                          |
| 205269_at       | lymphocyte cytosolic protein 2 (SH2 domain containing leukocyte protein of 76kDa)                                                                           | 1.12                                                          |

**Supplemental Gene List II. Airway Non-basal Cell Signature Genes Analyzed  
(cont. page 8)**

| <b>Probe ID</b> | <b>Gene name</b>                                                                        | <b>Median of normalized expression levels in lung adenoCa</b> |
|-----------------|-----------------------------------------------------------------------------------------|---------------------------------------------------------------|
| 219279_at       | dedicator of cytokinesis 10                                                             | 1.10                                                          |
| 219543_at       | MAWD binding protein                                                                    | 1.10                                                          |
| 219777_at       | GTPase, IMAP family member 6                                                            | 1.09                                                          |
| 209869_at       | adrenergic, alpha-2A-, receptor ; adrenergic, alpha-2A-, receptor                       | 1.08                                                          |
| 219684_at       | 28kD interferon responsive protein                                                      | 1.06                                                          |
| 209737_at       | membrane associated guanylate kinase, WW and PDZ domain containing 2                    | 1.06                                                          |
| 212980_at       | Ubiquitin specific peptidase 34                                                         | 1.05                                                          |
| 205384_at       | FXFD domain containing ion transport regulator 1 (phospholemman)                        | 1.05                                                          |
| 207651_at       | G protein-coupled receptor 171                                                          | 1.05                                                          |
| 205130_at       | renal tumor antigen                                                                     | 1.04                                                          |
| 221241_s_at     | BCL2-like 14 (apoptosis facilitator)                                                    | 1.04                                                          |
| 219734_at       | SID1 transmembrane family, member 1                                                     | 1.04                                                          |
| 212686_at       | protein phosphatase 1H (PP2C domain containing)                                         | 1.03                                                          |
| 212886_at       | DKFZP434C171 protein                                                                    | 1.02                                                          |
| 219870_at       | activating transcription factor 7 interacting protein 2                                 | 1.01                                                          |
| 218272_at       | hypothetical protein FLJ20699                                                           | 1.01                                                          |
| 221187_s_at     | hypothetical protein FLJ22688                                                           | 0.99                                                          |
| 207330_at       | pregnancy-zone protein                                                                  | 0.98                                                          |
| 206315_at       | cytokine receptor-like factor 1                                                         | 0.97                                                          |
| 206540_at       | galactosidase, beta 1-like                                                              | 0.97                                                          |
| 213385_at       | Chimerin (chimaerin) 2                                                                  | 0.97                                                          |
| 206197_at       | non-metastatic cells 5, protein expressed in (nucleoside-diphosphate kinase)            | 0.97                                                          |
| 213761_at       | Mdm4, transformed 3T3 cell double minute 1, p53 binding protein (mouse)                 | 0.97                                                          |
| 204890_s_at     | lymphocyte-specific protein tyrosine kinase                                             | 0.96                                                          |
| 220500_s_at     | RAB, member of RAS oncogene family-like 2B ; RAB, member of RAS oncogene family-like 2A | 0.96                                                          |
| 213228_at       | phosphodiesterase 8B                                                                    | 0.96                                                          |
| 57540_at        | ribokinase                                                                              | 0.96                                                          |
| 207522_s_at     | ATPase, Ca <sup>++</sup> transporting, ubiquitous                                       | 0.93                                                          |
| 218532_s_at     | hypothetical protein FLJ20152                                                           | 0.93                                                          |
| 212336_at       | erythrocyte membrane protein band 4.1-like 1                                            | 0.92                                                          |
| 207490_at       | tubulin, alpha 4                                                                        | 0.92                                                          |
| 204591_at       | cell adhesion molecule with homology to L1CAM (close                                    | 0.91                                                          |

**Supplemental Gene List II. Airway Non-basal Cell Signature Genes Analyzed**  
(cont. page 9)

| <b>Probe ID</b> | <b>Gene name</b>                                                 | <b>Median of normalized expression levels in lung adenoCa</b> |
|-----------------|------------------------------------------------------------------|---------------------------------------------------------------|
|                 | homolog of L1)                                                   |                                                               |
| 214467_at       | G protein-coupled receptor 65                                    | 0.89                                                          |
| 219396_s_at     | nei endonuclease VIII-like 1 (E. coli)                           | 0.88                                                          |
| 213888_s_at     | TRAF3 interacting protein 3                                      | 0.87                                                          |
| 215239_x_at     | zinc finger protein 273                                          | 0.87                                                          |
| 220177_s_at     | transmembrane protease, serine 3                                 | 0.86                                                          |
| 204798_at       | v-myb myeloblastosis viral oncogene homolog (avian)              | 0.86                                                          |
| 219687_at       | hedgehog acyltransferase                                         | 0.86                                                          |
| 205381_at       | leucine rich repeat containing 17                                | 0.85                                                          |
| 209460_at       | 4-aminobutyrate aminotransferase                                 | 0.85                                                          |
| 206496_at       | flavin containing monooxygenase 3                                | 0.85                                                          |
| 213839_at       | KIAA0500 protein                                                 | 0.85                                                          |
| 204187_at       | guanosine monophosphate reductase                                | 0.84                                                          |
| 221185_s_at     | IQ motif containing G                                            | 0.83                                                          |
| 214053_at       | V-erb-a erythroblastic leukemia viral oncogene homolog 4 (avian) | 0.83                                                          |
| 209167_at       | glycoprotein M6B                                                 | 0.82                                                          |
| 219860_at       | lymphocyte antigen 6 complex, locus G5C                          | 0.81                                                          |
| 219469_at       | dynein, cytoplasmic, heavy polypeptide 2                         | 0.80                                                          |
| 205898_at       | chemokine (C-X3-C motif) receptor 1                              | 0.80                                                          |
| 219584_at       | phospholipase A1 member A                                        | 0.79                                                          |
| 205906_at       | forkhead box J1                                                  | 0.78                                                          |
| 210176_at       | toll-like receptor 1                                             | 0.76                                                          |
| 213661_at       | regeneration associated muscle protease                          | 0.76                                                          |
| 207996_s_at     | chromosome 18 open reading frame 1                               | 0.75                                                          |
| 205769_at       | solute carrier family 27 (fatty acid transporter), member 2      | 0.75                                                          |
| 204529_s_at     | thymus high mobility group box protein TOX                       | 0.74                                                          |
| 206076_at       | B7 gene                                                          | 0.74                                                          |
| 210129_s_at     | tubulin tyrosine ligase-like family, member 3                    | 0.73                                                          |
| 213412_at       | tight junction protein 3 (zona occludens 3)                      | 0.72                                                          |
| 205673_s_at     | ankyrin repeat and SOCS box-containing 9                         | 0.72                                                          |
| 206274_s_at     | ciliary rootlet coiled-coil, rootletin                           | 0.70                                                          |
| 205896_at       | solute carrier family 22 (organic cation transporter), member 4  | 0.70                                                          |
| 204802_at       | Ras-related associated with diabetes                             | 0.69                                                          |
| 220441_at       | hypothetical protein FLJ13236                                    | 0.69                                                          |
| 213248_at       | hypothetical protein LOC221362                                   | 0.68                                                          |
| 207795_s_at     | killer cell lectin-like receptor subfamily D, member 1           | 0.68                                                          |

**Supplemental Gene List II. Airway Non-basal Cell Signature Genes Analyzed**  
(cont. page 10)

| <b>Probe ID</b> | <b>Gene name</b>                                                       | <b>Median of normalized expression levels in lung adenoCa</b> |
|-----------------|------------------------------------------------------------------------|---------------------------------------------------------------|
| 204754_at       | Hepatic leukemia factor                                                | 0.67                                                          |
| 202652_at       | amyloid beta (A4) precursor protein-binding, family B, member 1 (Fe65) | 0.67                                                          |
| 213996_at       | yippee-like 1 (Drosophila)                                             | 0.67                                                          |
| 216356_x_at     | BAI1-associated protein 3                                              | 0.67                                                          |
| 213601_at       | slit homolog 1 (Drosophila)                                            | 0.66                                                          |
| 205839_s_at     | benzodiazapine receptor (peripheral) associated protein 1              | 0.66                                                          |
| 211855_s_at     | solute carrier family 25 (mitochondrial carrier, brain), member 14     | 0.66                                                          |
| 206483_at       | leucine rich repeat containing 6                                       | 0.65                                                          |
| 209829_at       | chromosome 6 open reading frame 32                                     | 0.64                                                          |
| 219389_at       | sushi domain containing 4                                              | 0.64                                                          |
| 222220_s_at     | translin-associated factor X interacting protein 1                     | 0.64                                                          |
| 212745_s_at     | Bardet-Biedl syndrome 4                                                | 0.64                                                          |
| 214076_at       | Hypothetical protein MGC11335                                          | 0.64                                                          |
| 218876_at       | brain specific protein ; brain specific protein                        | 0.63                                                          |
| 216119_s_at     | chromosome 20 open reading frame 28                                    | 0.63                                                          |
| 219313_at       | hypothetical protein DKFZp434C0328                                     | 0.63                                                          |
| 213512_at       | chromosome 14 open reading frame 79                                    | 0.62                                                          |
| 220024_s_at     | periaxin                                                               | 0.61                                                          |
| 222291_at       | DKFZP564J102 protein                                                   | 0.61                                                          |
| 220005_at       | purinergic receptor P2Y, G-protein coupled, 13                         | 0.61                                                          |
| 210044_s_at     | lymphoblastic leukemia derived sequence 1                              | 0.61                                                          |
| 206631_at       | prostaglandin E receptor 2 (subtype EP2), 53kDa                        | 0.60                                                          |
| 209880_s_at     | selectin P ligand                                                      | 0.60                                                          |
| 211734_s_at     | Fc fragment of IgE, high affinity I, receptor for; alpha polypeptide   | 0.60                                                          |
| 49049_at        | deltex 3 homolog (Drosophila)                                          | 0.58                                                          |
| 210641_at       | calpain 9                                                              | 0.58                                                          |
| 207624_s_at     | retinitis pigmentosa GTPase regulator                                  | 0.58                                                          |
| 205073_at       | cytochrome P450, family 2, subfamily J, polypeptide 2                  | 0.57                                                          |
| 203485_at       | reticulon 1                                                            | 0.57                                                          |
| 212695_at       | cryptochrome 2 (photolyase-like)                                       | 0.57                                                          |
| 219951_s_at     | chromosome 20 open reading frame 12                                    | 0.57                                                          |
| 219753_at       | stromal antigen 3                                                      | 0.56                                                          |
| 206693_at       | interleukin 7                                                          | 0.56                                                          |
| 208530_s_at     | retinoic acid receptor, beta                                           | 0.56                                                          |
| 205208_at       | aldehyde dehydrogenase 1 family, member L1                             | 0.56                                                          |

**Supplemental Gene List II. Airway Non-basal Cell Signature Genes Analyzed**  
(cont. page 11)

| <b>Probe ID</b> | <b>Gene name</b>                                                                                   | <b>Median of normalized expression levels in lung adenoCa</b> |                   |
|-----------------|----------------------------------------------------------------------------------------------------|---------------------------------------------------------------|-------------------|
| 207704_s_at     | growth arrest-specific 7                                                                           | 0.56                                                          |                   |
| 208396_s_at     | phosphodiesterase 1A, calmodulin-dependent                                                         | 0.55                                                          |                   |
| 219370_at       | reprimo, TP53 dependant G2 arrest mediator candidate                                               | 0.54                                                          |                   |
| 220622_at       | leucine rich repeat containing 31                                                                  | 0.53                                                          |                   |
| 221928_at       | acetyl-Coenzyme A carboxylase beta                                                                 | 0.53                                                          |                   |
| 216663_s_at     | zinc finger, MYND-type containing 10                                                               | 0.52                                                          |                   |
| 210033_s_at     | sperm associated antigen 6                                                                         | 0.52                                                          |                   |
| 212935_at       | MCF.2 cell line derived transforming sequence-like                                                 | 0.52                                                          |                   |
| 208518_s_at     | period homolog 2 (Drosophila)                                                                      | 0.51                                                          |                   |
| 204378_at       | breast carcinoma amplified sequence 1                                                              | 0.51                                                          |                   |
| 219670_at       | chromosome 1 open reading frame 165                                                                | 0.51                                                          |                   |
| 219820_at       | solute carrier family 6, member 16                                                                 | 0.51                                                          |                   |
| 204792_s_at     | WD and tetratricopeptide repeats 2                                                                 | 0.51                                                          |                   |
| 204364_s_at     | chromosome 2 open reading frame 23                                                                 | 0.51                                                          |                   |
| 216807_at       | KIAA1751                                                                                           | 0.50                                                          |                   |
| 214032_at       | zeta-chain (TCR) associated protein kinase 70kDa                                                   | 0.50                                                          |                   |
| 209074_s_at     | TU3A protein                                                                                       | 0.50                                                          |                   |
| 205043_at       | cystic fibrosis transmembrane conductance regulator, ATP-binding cassette (sub-family C, member 7) | 0.50                                                          |                   |
| 41577_at        | protein phosphatase 1, regulatory (inhibitor) subunit 16B                                          | 0.49                                                          | Below 0.5x median |
| 219703_at       | meiosis-specific nuclear structural 1                                                              | 0.47                                                          | Below 0.5x median |
| 221122_at       | HRAS-like suppressor 2                                                                             | 0.47                                                          | Below 0.5x median |
| 215695_s_at     | glycogenin 2                                                                                       | 0.47                                                          | Below 0.5x median |
| 205969_at       | arylamide deacetylase (esterase)                                                                   | 0.47                                                          | Below 0.5x median |
| 206004_at       | transglutaminase 3 (E polypeptide, protein-glutamine-gamma-glutamyltransferase)                    | 0.45                                                          | Below 0.5x median |
| 201283_s_at     | OGT(O-Glc-NAc transferase)-interacting protein 106 KDa                                             | 0.45                                                          | Below 0.5x median |
| 214222_at       | dynein, axonemal, heavy polypeptide 7                                                              | 0.45                                                          | Below 0.5x median |
| 210505_at       | alcohol dehydrogenase 7 (class IV), mu or sigma polypeptide                                        | 0.44                                                          | Below 0.5x median |
| 220197_at       | ATPase, H+ transporting, lysosomal V0 subunit a isoform 4                                          | 0.44                                                          | Below 0.5x median |
| 215363_x_at     | folate hydrolase (prostate-specific membrane antigen) 1                                            | 0.44                                                          | Below 0.5x median |
| 221107_at       | cholinergic receptor, nicotinic, alpha polypeptide 9                                               | 0.43                                                          | Below 0.5x median |
| 220003_at       | leucine rich repeat containing 36                                                                  | 0.43                                                          | Below 0.5x median |
| 206336_at       | chemokine (C-X-C motif) ligand 6 (granulocyte chemotactic protein 2)                               | 0.43                                                          | Below 0.5x median |
| 219824_at       | solute carrier family 13 (sodium/sulfate symporters),                                              | 0.43                                                          | Below 0.5x median |

**Supplemental Gene List II. Airway Non-basal Cell Signature Genes Analyzed**  
(cont. page 12)

| <b>Probe ID</b> | <b>Gene name</b>                                                                                     | <b>Median of normalized expression levels in lung adenoCa</b> |                   |
|-----------------|------------------------------------------------------------------------------------------------------|---------------------------------------------------------------|-------------------|
|                 | member 4                                                                                             |                                                               |                   |
| 220581_at       | chromosome 6 open reading frame 97                                                                   | 0.43                                                          | Below 0.5x median |
| 213438_at       | neurofascin                                                                                          | 0.43                                                          | Below 0.5x median |
| 209828_s_at     | interleukin 16 (lymphocyte chemoattractant factor)                                                   | 0.43                                                          | Below 0.5x median |
| 213679_at       | hypothetical protein FLJ13946                                                                        | 0.42                                                          | Below 0.5x median |
| 219695_at       | sphingomyelin phosphodiesterase 3, neutral membrane (neutral sphingomyelinase II)                    | 0.42                                                          | Below 0.5x median |
| 206078_at       | kalirin, RhoGEF kinase                                                                               | 0.41                                                          | Below 0.5x median |
| 205979_at       | secretoglobin, family 2A, member 1                                                                   | 0.40                                                          | Below 0.5x median |
| 210323_at       | tektin 2 (testicular)                                                                                | 0.40                                                          | Below 0.5x median |
| 219455_at       | hypothetical protein FLJ21062                                                                        | 0.40                                                          | Below 0.5x median |
| 215266_at       | dynein, axonemal, heavy polypeptide 3                                                                | 0.40                                                          | Below 0.5x median |
| 205662_at       | B9 protein                                                                                           | 0.40                                                          | Below 0.5x median |
| 219115_s_at     | interleukin 20 receptor, alpha                                                                       | 0.39                                                          | Below 0.5x median |
| 220107_s_at     | chromosome 14 open reading frame 140                                                                 | 0.39                                                          | Below 0.5x median |
| 205243_at       | solute carrier family 13 (sodium-dependent dicarboxylate transporter), member 3                      | 0.39                                                          | Below 0.5x median |
| 206938_at       | steroid-5-alpha-reductase, alpha polypeptide 2 (3-oxo-5 alpha-steroid delta 4-dehydrogenase alpha 2) | 0.39                                                          | Below 0.5x median |
| 219768_at       | V-set domain containing T cell activation inhibitor 1                                                | 0.39                                                          | Below 0.5x median |
| 209789_at       | coronin, actin binding protein, 2B                                                                   | 0.38                                                          | Below 0.5x median |
| 208109_s_at     | chromosome 15 open reading frame 5                                                                   | 0.38                                                          | Below 0.5x median |
| 220059_at       | BCR downstream signaling 1                                                                           | 0.38                                                          | Below 0.5x median |
| 205848_at       | growth arrest-specific 2                                                                             | 0.38                                                          | Below 0.5x median |
| 220908_at       | hypothetical protein FLJ32855                                                                        | 0.37                                                          | Below 0.5x median |
| 217016_x_at     | hypothetical LOC389177                                                                               | 0.37                                                          | Below 0.5x median |
| 220958_at       | unc-51-like kinase 4 (C. elegans)                                                                    | 0.37                                                          | Below 0.5x median |
| 214551_s_at     | CD7 antigen (p41)                                                                                    | 0.37                                                          | Below 0.5x median |
| 214261_s_at     | alcohol dehydrogenase 6 (class V)                                                                    | 0.37                                                          | Below 0.5x median |
| 217245_at       | early lymphoid activation protein                                                                    | 0.36                                                          | Below 0.5x median |
| 207902_at       | interleukin 5 receptor, alpha                                                                        | 0.36                                                          | Below 0.5x median |
| 220390_at       | ATP/GTP binding protein-like 2                                                                       | 0.36                                                          | Below 0.5x median |
| 220636_at       | dynein, axonemal, intermediate polypeptide 2                                                         | 0.36                                                          | Below 0.5x median |
| 221173_at       | Usher syndrome 1C (autosomal recessive, severe)                                                      | 0.36                                                          | Below 0.5x median |
| 219136_s_at     | hypothetical protein FLJ12681                                                                        | 0.35                                                          | Below 0.5x median |
| 210409_at       | chromosome 6 open reading frame 124                                                                  | 0.35                                                          | Below 0.5x median |
| 219743_at       | hairy/enhancer-of-split related with YRPW motif 2                                                    | 0.34                                                          | Below 0.5x median |
| 220416_at       | ATPase, Class I, type 8B, member 4                                                                   | 0.34                                                          | Below 0.5x median |



**Supplemental Gene List II. Airway Non-basal Cell Signature Genes Analyzed**  
(cont. page 13)

| <b>Probe ID</b> | <b>Gene name</b>                                                                                                                                                     | <b>Median of normalized expression levels in lung adenoCa</b> |                   |
|-----------------|----------------------------------------------------------------------------------------------------------------------------------------------------------------------|---------------------------------------------------------------|-------------------|
| 219882_at       | tubulin tyrosine ligase-like family, member 7                                                                                                                        | 0.34                                                          | Below 0.5x median |
| 205844_at       | vanin 1                                                                                                                                                              | 0.34                                                          | Below 0.5x median |
| 206424_at       | cytochrome P450, family 26, subfamily A, polypeptide 1                                                                                                               | 0.33                                                          | Below 0.5x median |
| 207636_at       | serpin peptidase inhibitor, clade I (pancpin), member 2                                                                                                              | 0.33                                                          | Below 0.5x median |
| 210693_at       | signal peptide peptidase-like 2B                                                                                                                                     | 0.33                                                          | Below 0.5x median |
| 220312_at       | family with sequence similarity 83, member E                                                                                                                         | 0.32                                                          | Below 0.5x median |
| 209368_at       | epoxide hydrolase 2, cytoplasmic                                                                                                                                     | 0.32                                                          | Below 0.5x median |
| 213959_s_at     | KIAA1005 protein                                                                                                                                                     | 0.32                                                          | Below 0.5x median |
| 207981_s_at     | estrogen-related receptor gamma                                                                                                                                      | 0.31                                                          | Below 0.5x median |
| 210742_at       | CDC14 cell division cycle 14 homolog A ( <i>S. cerevisiae</i> )                                                                                                      | 0.31                                                          | Below 0.5x median |
| 220331_at       | cytochrome P450, family 46, subfamily A, polypeptide 1                                                                                                               | 0.31                                                          | Below 0.5x median |
| 47553_at        | deafness, autosomal recessive 31                                                                                                                                     | 0.31                                                          | Below 0.5x median |
| 206773_at       | lymphocyte antigen 6 complex, locus H                                                                                                                                | 0.30                                                          | Below 0.5x median |
| 204796_at       | echinoderm microtubule associated protein like 1                                                                                                                     | 0.30                                                          | Below 0.5x median |
| 219871_at       | hypothetical protein FLJ13197                                                                                                                                        | 0.30                                                          | Below 0.5x median |
| 221161_at       | achaete-scute complex ( <i>Drosophila</i> ) homolog-like 3                                                                                                           | 0.30                                                          | Below 0.5x median |
| 205623_at       | aldehyde dehydrogenase 3 family, memberA1                                                                                                                            | 0.30                                                          | Below 0.5x median |
| 220196_at       | mucin 16                                                                                                                                                             | 0.30                                                          | Below 0.5x median |
| 207772_s_at     | HMT1 hnRNP methyltransferase-like 4 ( <i>S. cerevisiae</i> )                                                                                                         | 0.30                                                          | Below 0.5x median |
| 214598_at       | claudin 8                                                                                                                                                            | 0.30                                                          | Below 0.5x median |
| 205922_at       | vanin 2                                                                                                                                                              | 0.29                                                          | Below 0.5x median |
| 206556_at       | clusterin-like 1 (retinal)                                                                                                                                           | 0.29                                                          | Below 0.5x median |
| 219857_at       | chromosome 10 open reading frame 81                                                                                                                                  | 0.29                                                          | Below 0.5x median |
| 37547_at        | parathyroid hormone-responsive B1                                                                                                                                    | 0.28                                                          | Below 0.5x median |
| 205744_at       | double C2-like domains, alpha                                                                                                                                        | 0.28                                                          | Below 0.5x median |
| 206005_s_at     | chromosome 6 open reading frame 84                                                                                                                                   | 0.28                                                          | Below 0.5x median |
| 209693_at       | astrotactin 2                                                                                                                                                        | 0.28                                                          | Below 0.5x median |
| 219587_at       | tetratricopeptide repeat domain 12                                                                                                                                   | 0.28                                                          | Below 0.5x median |
| 208597_at       | ciliary neurotrophic factor                                                                                                                                          | 0.28                                                          | Below 0.5x median |
| 205921_s_at     | solute carrier family 6 (neurotransmitter transporter, taurine), member 6                                                                                            | 0.27                                                          | Below 0.5x median |
| 205795_at       | neurexin 3                                                                                                                                                           | 0.27                                                          | Below 0.5x median |
| 206457_s_at     | deiodinase, iodothyronine, type I                                                                                                                                    | 0.27                                                          | Below 0.5x median |
| 206262_at       | alcohol dehydrogenase 1A (class I), alpha polypeptide ; alcohol dehydrogenase 1B (class I), beta polypeptide ; alcohol dehydrogenase 1C (class I), gamma polypeptide | 0.27                                                          | Below 0.5x median |
| 219564_at       | potassium inwardly-rectifying channel, subfamily J, member 16                                                                                                        | 0.26                                                          | Below 0.5x median |

**Supplemental Gene List II. Airway Non-basal Cell Signature Genes Analyzed**  
(cont. page 14)

| <b>Probe ID</b> | <b>Gene name</b>                                                                                                        | <b>Median of normalized expression levels in lung adenoCa</b> |                   |
|-----------------|-------------------------------------------------------------------------------------------------------------------------|---------------------------------------------------------------|-------------------|
| 205715_at       | bone marrow stromal cell antigen 1                                                                                      | 0.26                                                          | Below 0.5x median |
| 207244_x_at     | cytochrome P450, family 2, subfamily A, polypeptide 6                                                                   | 0.25                                                          | Below 0.5x median |
| 215904_at       | myeloid/lymphoid or mixed-lineage leukemia (trithorax homolog, Drosophila); translocated to, 4                          | 0.25                                                          | Below 0.5x median |
| 215043_s_at     | SMA3 ; SMA5                                                                                                             | 0.25                                                          | Below 0.5x median |
| 219663_s_at     | hole gene                                                                                                               | 0.25                                                          | Below 0.5x median |
| 220308_at       | coiled-coil domain containing 19                                                                                        | 0.25                                                          | Below 0.5x median |
| 215143_at       | Hypothetical protein FLJ36166                                                                                           | 0.25                                                          | Below 0.5x median |
| 214204_at       | PARK2 co-regulated                                                                                                      | 0.25                                                          | Below 0.5x median |
| 222205_x_at     | Chromosome 20 open reading frame 91                                                                                     | 0.24                                                          | Below 0.5x median |
| 205473_at       | ATPase, H <sup>+</sup> transporting, lysosomal 56/58kDa, V1 subunit B, isoform 1 (Renal tubular acidosis with deafness) | 0.24                                                          | Below 0.5x median |
| 214188_at       | Hexamethylene bis-acetamide inducible 1                                                                                 | 0.24                                                          | Below 0.5x median |
| 206291_at       | neurotensin                                                                                                             | 0.24                                                          | Below 0.5x median |
| 206318_at       | serine peptidase inhibitor-like, with Kunitz and WAP domains 1 (eppin)                                                  | 0.24                                                          | Below 0.5x median |
| 220321_s_at     | hypothetical protein FLJ13646                                                                                           | 0.24                                                          | Below 0.5x median |
| 219766_at       | hypothetical protein MGC4093                                                                                            | 0.23                                                          | Below 0.5x median |
| 206541_at       | kallikrein B, plasma (Fletcher factor) 1                                                                                | 0.23                                                          | Below 0.5x median |
| 205031_at       | ephrin-B3                                                                                                               | 0.23                                                          | Below 0.5x median |
| 220389_at       | hypothetical protein FLJ23514                                                                                           | 0.23                                                          | Below 0.5x median |
| 216103_at       | acyl-CoA thioesterase 11                                                                                                | 0.23                                                          | Below 0.5x median |
| 204557_s_at     | DAZ interacting protein 1                                                                                               | 0.22                                                          | Below 0.5x median |
| 210082_at       | ATP-binding cassette, sub-family A (ABC1), member 4                                                                     | 0.22                                                          | Below 0.5x median |
| 220156_at       | EF-hand calcium binding domain 1                                                                                        | 0.22                                                          | Below 0.5x median |
| 207900_at       | chemokine (C-C motif) ligand 17                                                                                         | 0.22                                                          | Below 0.5x median |
| 219965_s_at     | PDZ domain containing, X chromosome                                                                                     | 0.21                                                          | Below 0.5x median |
| 213589_s_at     | hypothetical protein LOC146712 ; UDP-GlcNAc:betaGal beta-1,3-N-acetylglucosaminyltransferase-like 1                     | 0.21                                                          | Below 0.5x median |
| 214082_at       | carbonic anhydrase VB, mitochondrial                                                                                    | 0.21                                                          | Below 0.5x median |
| 220168_at       | cancer susceptibility candidate 1                                                                                       | 0.21                                                          | Below 0.5x median |
| 207021_at       | zona pellucida binding protein                                                                                          | 0.21                                                          | Below 0.5x median |
| 222134_at       | D-aspartate oxidase                                                                                                     | 0.20                                                          | Below 0.5x median |
| 206243_at       | TIMP metalloproteinase inhibitor 4                                                                                      | 0.20                                                          | Below 0.5x median |
| 220351_at       | chemokine (C-C motif) receptor-like 1                                                                                   | 0.20                                                          | Below 0.5x median |
| 206465_at       | acyl-CoA synthetase bubblegum family member 1                                                                           | 0.20                                                          | Below 0.5x median |
| 206721_at       | chromosome 1 open reading frame 114                                                                                     | 0.20                                                          | Below 0.5x median |
| 214156_at       | myosin VIIA and Rab interacting protein                                                                                 | 0.20                                                          | Below 0.5x median |

**Supplemental Gene List II. Airway Non-basal Cell Signature Genes Analyzed**  
(cont. page 15)

| <b>Probe ID</b> | <b>Gene name</b>                                                    | <b>Median of normalized expression levels in lung adenoCa</b> |                   |
|-----------------|---------------------------------------------------------------------|---------------------------------------------------------------|-------------------|
| 210390_s_at     | chemokine (C-C motif) ligand 15                                     | 0.19                                                          | Below 0.5x median |
| 206480_at       | leukotriene C4 synthase                                             | 0.19                                                          | Below 0.5x median |
| 220125_at       | dynein, axonemal, intermediate polypeptide 1                        | 0.19                                                          | Below 0.5x median |
| 222068_s_at     | leucine rich repeat containing 50                                   | 0.19                                                          | Below 0.5x median |
| 205675_at       | microsomal triglyceride transfer protein (large polypeptide, 88kDa) | 0.19                                                          | Below 0.5x median |
| 210073_at       | ST8 alpha-N-acetyl-neuraminide alpha-2,8-sialyltransferase 1        | 0.18                                                          | Below 0.5x median |
| 213456_at       | sclerostin domain containing 1                                      | 0.18                                                          | Below 0.5x median |
| 211303_x_at     | prostate-specific membrane antigen-like                             | 0.18                                                          | Below 0.5x median |
| 206017_at       | KIAA0319                                                            | 0.18                                                          | Below 0.5x median |
| 220302_at       | male germ cell-associated kinase                                    | 0.18                                                          | Below 0.5x median |
| 220218_at       | chromosome 9 open reading frame 68                                  | 0.18                                                          | Below 0.5x median |
| 214147_at       | chromosome 1 open reading frame 175                                 | 0.17                                                          | Below 0.5x median |
| 219511_s_at     | synuclein, alpha interacting protein (synphilin)                    | 0.17                                                          | Below 0.5x median |
| 213217_at       | adenylate cyclase 2 (brain)                                         | 0.17                                                          | Below 0.5x median |
| 214217_at       | Glutamate receptor, metabotropic 5                                  | 0.17                                                          | Below 0.5x median |
| 210262_at       | cysteine-rich secretory protein 2                                   | 0.17                                                          | Below 0.5x median |
| 205413_at       | metallophosphoesterase domain containing 2                          | 0.17                                                          | Below 0.5x median |
| 220539_at       | chromosome 10 open reading frame 92                                 | 0.16                                                          | Below 0.5x median |
| 220812_s_at     | HERV-H LTR-associating 2                                            | 0.16                                                          | Below 0.5x median |
| 221908_at       | Hypothetical protein FLJ14627                                       | 0.16                                                          | Below 0.5x median |
| 207958_at       | UDP glucuronosyltransferase 2 family, polypeptide A1                | 0.16                                                          | Below 0.5x median |
| 203995_at       | chromosome 21 open reading frame 2                                  | 0.16                                                          | Below 0.5x median |
| 207430_s_at     | microseminoprotein, beta-                                           | 0.16                                                          | Below 0.5x median |
| 220523_at       | EF-hand domain (C-terminal) containing 2                            | 0.16                                                          | Below 0.5x median |
| 220269_at       | hypothetical protein FLJ23049                                       | 0.16                                                          | Below 0.5x median |
| 213611_at       | aquaporin 5                                                         | 0.16                                                          | Below 0.5x median |
| 214608_s_at     | eyes absent homolog 1 (Drosophila)                                  | 0.16                                                          | Below 0.5x median |
| 210328_at       | glycine N-methyltransferase                                         | 0.16                                                          | Below 0.5x median |
| 215174_at       | flavin containing monooxygenase 6                                   | 0.15                                                          | Below 0.5x median |
| 205948_at       | protein tyrosine phosphatase, receptor type, T                      | 0.15                                                          | Below 0.5x median |
| 214385_s_at     | mucin 5, subtypes A and C, tracheobronchial/gastric                 | 0.15                                                          | Below 0.5x median |
| 220055_at       | zinc finger protein 287                                             | 0.14                                                          | Below 0.5x median |
| 207583_at       | ATP-binding cassette, sub-family D (ALD), member 2                  | 0.14                                                          | Below 0.5x median |
| 219578_s_at     | cytoplasmic polyadenylation element binding protein 1               | 0.14                                                          | Below 0.5x median |
| 220991_s_at     | ring finger protein 32                                              | 0.14                                                          | Below 0.5x median |
| 206755_at       | cytochrome P450, family 2, subfamily B, polypeptide 6               | 0.14                                                          | Below 0.5x median |

**Supplemental Gene List II. Airway Non-basal Cell Signature Genes Analyzed**  
(cont. page 16)

| <b>Probe ID</b> | <b>Gene name</b>                                                                      | <b>Median of normalized expression levels in lung adenoCa</b> |                   |
|-----------------|---------------------------------------------------------------------------------------|---------------------------------------------------------------|-------------------|
| 207550_at       | myeloproliferative leukemia virus oncogene                                            | 0.13                                                          | Below 0.5x median |
| 220344_at       | chromosome 11 open reading frame 16                                                   | 0.13                                                          | Below 0.5x median |
| 216135_at       | Hypothetical protein MGC35048                                                         | 0.13                                                          | Below 0.5x median |
| 214162_at       | hypothetical protein LOC284244                                                        | 0.13                                                          | Below 0.5x median |
| 221180_at       | Yeast Sps1/Ste20-related kinase 4 ( <i>S. cerevisiae</i> )                            | 0.12                                                          | Below 0.5x median |
| 205056_s_at     | G protein-coupled receptor 162                                                        | 0.12                                                          | Below 0.5x median |
| 220280_s_at     | ankyrin repeat and MYND domain containing 1                                           | 0.12                                                          | Below 0.5x median |
| 205363_at       | butyrobetaine (gamma), 2-oxoglutarate dioxygenase (gamma-butyrobetaine hydroxylase) 1 | 0.12                                                          | Below 0.5x median |
| 210445_at       | fatty acid binding protein 6, ileal (gastrotropin)                                    | 0.11                                                          | Below 0.5x median |
| 219106_s_at     | kelch repeat and BTB (POZ) domain containing 10                                       | 0.11                                                          | Below 0.5x median |
| 219614_s_at     | solute carrier family 6 (proline IMINO transporter), member 20                        | 0.11                                                          | Below 0.5x median |
| 222102_at       | glutathione S-transferase A3                                                          | 0.10                                                          | Below 0.5x median |
| 220528_at       | vanin 3                                                                               | 0.10                                                          | Below 0.5x median |
| 214818_at       | hypothetical protein LOC284001                                                        | 0.10                                                          | Below 0.5x median |
| 205044_at       | gamma-aminobutyric acid (GABA) A receptor, pi                                         | 0.10                                                          | Below 0.5x median |
| 207913_at       | cytochrome P450, family 2, subfamily F, polypeptide 1                                 | 0.10                                                          | Below 0.5x median |
| 207797_s_at     | LRP2 binding protein                                                                  | 0.10                                                          | Below 0.5x median |
| 207149_at       | cadherin 12, type 2 (N-cadherin 2)                                                    | 0.10                                                          | Below 0.5x median |
| 221863_at       | KIAA1193                                                                              | 0.09                                                          | Below 0.5x median |
| 220614_s_at     | chromosome 6 open reading frame 103                                                   | 0.09                                                          | Below 0.5x median |
| 205337_at       | dopachrome tautomerase (dopachrome delta-isomerase, tyrosine-related protein 2)       | 0.09                                                          | Below 0.5x median |
| 220361_at       | hypothetical protein FLJ12476                                                         | 0.09                                                          | Below 0.5x median |
| 205813_s_at     | methionine adenosyltransferase I, alpha                                               | 0.09                                                          | Below 0.5x median |
| 220652_at       | kinesin family member 24                                                              | 0.09                                                          | Below 0.5x median |
| 211468_s_at     | RecQ protein-like 5                                                                   | 0.09                                                          | Below 0.5x median |
| 221182_at       | chromosome 1 open reading frame 129                                                   | 0.08                                                          | Below 0.5x median |
| 214420_s_at     | Cytochrome P450, family 2, subfamily C, polypeptide 9                                 | 0.08                                                          | Below 0.5x median |
| 207344_at       | A kinase (PRKA) anchor protein 3                                                      | 0.08                                                          | Below 0.5x median |
| 222089_s_at     | hypothetical protein AF447587                                                         | 0.08                                                          | Below 0.5x median |
| 220766_at       | B-cell translocation gene 4                                                           | 0.08                                                          | Below 0.5x median |
| 208327_at       | cytochrome P450, family 2, subfamily A, polypeptide 13                                | 0.07                                                          | Below 0.5x median |
| 206810_at       | zinc finger protein 44 (KOX 7)                                                        | 0.07                                                          | Below 0.5x median |
| 220426_at       | hypothetical protein MGC5356                                                          | 0.07                                                          | Below 0.5x median |
| 214652_at       | dopamine receptor D1                                                                  | 0.07                                                          | Below 0.5x median |
| 206526_at       | RIB43A domain with coiled-coils 2                                                     | 0.06                                                          | Below 0.5x median |

**Supplemental Gene List II. Airway Non-basal Cell Signature Genes Analyzed**  
(cont. page 17)

| <b>Probe ID</b> | <b>Gene name</b>                                                                                                                | <b>Median of normalized expression levels in lung adenoCa</b> |                   |
|-----------------|---------------------------------------------------------------------------------------------------------------------------------|---------------------------------------------------------------|-------------------|
| 207896_s_at     | deleted in lung and esophageal cancer 1                                                                                         | 0.06                                                          | Below 0.5x median |
| 220756_s_at     | G protein-coupled receptor 172B                                                                                                 | 0.06                                                          | Below 0.5x median |
| 206149_at       | hepatocellular carcinoma antigen gene 520                                                                                       | 0.06                                                          | Below 0.5x median |
| 207177_at       | prostaglandin F receptor (FP)                                                                                                   | 0.06                                                          | Below 0.5x median |
| 221946_at       | chromosome 9 open reading frame 116                                                                                             | 0.06                                                          | Below 0.5x median |
| 213845_at       | GRIK2=GluR6 kainate receptor {3' untranslated region, TAA trinucleotide repeats} [human, caudate/putamen, mRNA Partial, 540 nt] | 0.06                                                          | Below 0.5x median |
| 209720_s_at     | serpin peptidase inhibitor, clade B (ovalbumin), member 3                                                                       | 0.06                                                          | Below 0.5x median |
| 216209_at       | hypothetical gene supported by AK057632; AL137270; BC057846                                                                     | 0.06                                                          | Below 0.5x median |
| 207328_at       | arachidonate 15-lipoxygenase                                                                                                    | 0.05                                                          | Below 0.5x median |
| 220064_at       | tetratricopeptide repeat domain 21B                                                                                             | 0.05                                                          | Below 0.5x median |
| 207766_at       | cyclin-dependent kinase-like 1 (CDC2-related kinase)                                                                            | 0.05                                                          | Below 0.5x median |
| 210402_at       | potassium inwardly-rectifying channel, subfamily J, member 1                                                                    | 0.05                                                          | Below 0.5x median |
| 214961_at       | KIAA0774                                                                                                                        | 0.04                                                          | Below 0.5x median |
| 215432_at       | acyl-CoA synthetase medium-chain family member 1                                                                                | 0.04                                                          | Below 0.5x median |
| 203030_s_at     | protein tyrosine phosphatase, receptor type, N polypeptide 2                                                                    | 0.04                                                          | Below 0.5x median |
| 206815_at       | sperm associated antigen 8                                                                                                      | 0.04                                                          | Below 0.5x median |
| 220105_at       | rhabdoid tumor deletion region gene 1                                                                                           | 0.03                                                          | Below 0.5x median |
| 206380_s_at     | properdin P factor, complement                                                                                                  | 0.03                                                          | Below 0.5x median |
| 207261_at       | cyclic nucleotide gated channel alpha 3                                                                                         | 0.03                                                          | Below 0.5x median |
| 205478_at       | protein phosphatase 1, regulatory (inhibitor) subunit 1A                                                                        | 0.03                                                          | Below 0.5x median |
| 206522_at       | maltase-glucoamylase (alpha-glucosidase)                                                                                        | 0.03                                                          | Below 0.5x median |

**Supplemental Gene List III. Transcriptomal Differences between Basal Cell (BC)-high  
Adenocarcinoma (adenoCa) vs BC-low AdenoCa**

| Probe ID    | Gene name                                                                | BC-high adenoCa vs BC-low adenoCa |                        |
|-------------|--------------------------------------------------------------------------|-----------------------------------|------------------------|
|             |                                                                          | Fold-change                       | p value                |
| 37892_at    | collagen, type XI, alpha 1                                               | 12.60                             | 2.37x10 <sup>-9</sup>  |
| 209125_at   | keratin 6A ; keratin 6C ; keratin 6E                                     | 8.53                              | 2.94x10 <sup>-8</sup>  |
| 204855_at   | serpin peptidase inhibitor, clade B (ovalbumin), member 5                | 7.94                              | 3.20x10 <sup>-6</sup>  |
| 204475_at   | matrix metalloproteinase 1 (interstitial collagenase)                    | 6.44                              | 1.70x10 <sup>-5</sup>  |
| 205627_at   | cytidine deaminase                                                       | 6.13                              | 9.09x10 <sup>-8</sup>  |
| 206023_at   | neuromedin U                                                             | 6.03                              | 3.58x10 <sup>-5</sup>  |
| 218469_at   | gremlin 1, cysteine knot superfamily, homolog (Xenopus laevis)           | 5.46                              | 1.47x10 <sup>-11</sup> |
| 209942_x_at | melanoma antigen family A, 3                                             | 5.15                              | 4.14x10 <sup>-3</sup>  |
| 213338_at   | Ras-induced senescence 1                                                 | 5.08                              | 3.25x10 <sup>-10</sup> |
| 205476_at   | chemokine (C-C motif) ligand 20                                          | 4.51                              | 1.08x10 <sup>-3</sup>  |
| 205403_at   | interleukin 1 receptor, type II                                          | 4.51                              | 5.20x10 <sup>-6</sup>  |
| 206561_s_at | aldo-keto reductase family 1, member B10 (aldose reductase)              | 4.50                              | 9.77x10 <sup>-4</sup>  |
| 219555_s_at | uncharacterized bone marrow protein BM039                                | 4.47                              | 5.09x10 <sup>-7</sup>  |
| 214612_x_at | melanoma antigen family A, 6                                             | 4.41                              | 6.97x10 <sup>-3</sup>  |
| 204420_at   | FOS-like antigen 1                                                       | 4.34                              | 6.57x10 <sup>-9</sup>  |
| 204641_at   | NIMA (never in mitosis gene a)-related kinase 2                          | 4.25                              | 2.84x10 <sup>-9</sup>  |
| 213711_at   | keratin, hair, basic, 1                                                  | 4.22                              | 2.56x10 <sup>-3</sup>  |
| 201890_at   | ribonucleotide reductase M2 polypeptide                                  | 4.21                              | 9.25x10 <sup>-12</sup> |
| 209825_s_at | uridine-cytidine kinase 2                                                | 4.15                              | 6.69x10 <sup>-9</sup>  |
| 211506_s_at | interleukin 8                                                            | 4.15                              | 3.66x10 <sup>-7</sup>  |
| 202855_s_at | solute carrier family 16 (monocarboxylic acid transporters), member 3    | 4.15                              | 2.03x10 <sup>-13</sup> |
| 219918_s_at | asp (abnormal spindle)-like, microcephaly associated (Drosophila)        | 4.14                              | 1.10x10 <sup>-7</sup>  |
| 213201_s_at | troponin T type 1 (skeletal, slow)                                       | 4.12                              | 1.34x10 <sup>-4</sup>  |
| 201710_at   | v-myb myeloblastosis viral oncogene homolog (avian)-like 2               | 4.08                              | 1.32x10 <sup>-9</sup>  |
| 221520_s_at | cell division cycle associated 8                                         | 3.99                              | 1.44x10 <sup>-7</sup>  |
| 201564_s_at | fascin homolog 1, actin-bundling protein (Strongylocentrotus purpuratus) | 3.92                              | 3.98x10 <sup>-9</sup>  |
| 209587_at   | paired-like homeodomain transcription factor 1                           | 3.88                              | 2.78x10 <sup>-5</sup>  |
| 206155_at   | ATP-binding cassette, sub-family C (CFTR/MRP), member 2                  | 3.79                              | 3.15x10 <sup>-4</sup>  |
| 220431_at   | transmembrane protease, serine 11E                                       | 3.76                              | 1.78x10 <sup>-4</sup>  |

**Supplemental Gene List III. Transcriptomal Differences between Basal Cell (BC)-high  
Adenocarcinoma (adenoCa) vs BC-low AdenoCa (cont. page 2)**

| Probe ID    | Gene name                                                              | BC-high adenoCa vs BC-low adenoCa |                        |
|-------------|------------------------------------------------------------------------|-----------------------------------|------------------------|
|             |                                                                        | Fold-change                       | p value                |
| 204162_at   | kinetochore associated 2                                               | 3.74                              | 7.34x10 <sup>-7</sup>  |
| 205874_at   | inositol 1,4,5-trisphosphate 3-kinase A                                | 3.73                              | 4.12x10 <sup>-5</sup>  |
| 213790_at   | ADAM metallopeptidase domain 12 (meltrin alpha)                        | 3.72                              | 2.87x10 <sup>-8</sup>  |
| 218542_at   | chromosome 10 open reading frame 3                                     | 3.68                              | 9.68x10 <sup>-10</sup> |
| 205490_x_at | gap junction protein, beta 3, 31kDa (connexin 31)                      | 3.67                              | 6.94x10 <sup>-6</sup>  |
| 211571_s_at | chondroitin sulfate proteoglycan 2 (versican)                          | 3.66                              | 4.21x10 <sup>-8</sup>  |
| 214603_at   | melanoma antigen family A, 2 ; melanoma antigen family A, 2B           | 3.65                              | 7.05x10 <sup>-3</sup>  |
| 202580_x_at | forkhead box M1                                                        | 3.62                              | 3.71x10 <sup>-8</sup>  |
| 204126_s_at | CDC45 cell division cycle 45-like ( <i>S. cerevisiae</i> )             | 3.62                              | 4.57x10 <sup>-5</sup>  |
| 212992_at   | chromosome 14 open reading frame 78                                    | 3.61                              | 1.26x10 <sup>-10</sup> |
| 212353_at   | sulfatase 1                                                            | 3.59                              | 3.11x10 <sup>-9</sup>  |
| 210052_s_at | TPX2, microtubule-associated, homolog ( <i>Xenopus laevis</i> )        | 3.59                              | 3.17x10 <sup>-10</sup> |
| 202870_s_at | CDC20 cell division cycle 20 homolog ( <i>S. cerevisiae</i> )          | 3.57                              | 1.38x10 <sup>-9</sup>  |
| 205959_at   | matrix metallopeptidase 13 (collagenase 3)                             | 3.57                              | 1.65x10 <sup>-3</sup>  |
| 202779_s_at | ubiquitin-conjugating enzyme E2S                                       | 3.56                              | 2.52x10 <sup>-12</sup> |
| 204351_at   | S100 calcium binding protein P                                         | 3.55                              | 7.27x10 <sup>-3</sup>  |
| 221521_s_at | DNA replication complex GINS protein PSF2                              | 3.55                              | 5.28x10 <sup>-6</sup>  |
| 203819_s_at | IGF-II mRNA-binding protein 3                                          | 3.54                              | 2.13x10 <sup>-3</sup>  |
| 204920_at   | carbamoyl-phosphate synthetase 1, mitochondrial                        | 3.54                              | 7.60x10 <sup>-4</sup>  |
| 205064_at   | small proline-rich protein 1B (cornifin)                               | 3.50                              | 4.65x10 <sup>-4</sup>  |
| 218726_at   | Holliday junction recognition protein                                  | 3.49                              | 4.36x10 <sup>-8</sup>  |
| 204825_at   | maternal embryonic leucine zipper kinase                               | 3.40                              | 1.27x10 <sup>-8</sup>  |
| 211668_s_at | plasminogen activator, urokinase                                       | 3.40                              | 2.37x10 <sup>-9</sup>  |
| 212949_at   | barren homolog ( <i>Drosophila</i> )                                   | 3.40                              | 5.64x10 <sup>-8</sup>  |
| 204952_at   | LY6/PLAUR domain containing 3                                          | 3.36                              | 5.09x10 <sup>-5</sup>  |
| 202311_s_at | collagen, type I, alpha 1                                              | 3.35                              | 3.33x10 <sup>-7</sup>  |
| 203876_s_at | matrix metallopeptidase 11 (stromelysin 3)                             | 3.34                              | 1.41x10 <sup>-5</sup>  |
| 202363_at   | sparc/osteonectin, cwcv and kazal-like domains proteoglycan (testican) | 3.33                              | 1.10x10 <sup>-7</sup>  |
| 221009_s_at | angiopoietin-like 4                                                    | 3.33                              | 1.66x10 <sup>-7</sup>  |
| 205046_at   | centromere protein E, 312kDa                                           | 3.32                              | 6.09x10 <sup>-8</sup>  |
| 219491_at   | leucine rich repeat and fibronectin type III domain containing 4       | 3.31                              | 4.06x10 <sup>-6</sup>  |
| 206504_at   | cytochrome P450, family 24, subfamily A, polypeptide 1                 | 3.30                              | 8.91x10 <sup>-4</sup>  |
| 203535_at   | S100 calcium binding protein A9 (calgranulin B)                        | 3.30                              | 4.96x10 <sup>-5</sup>  |
| 214370_at   | S100 calcium binding protein A8 (calgranulin A)                        | 3.27                              | 1.25x10 <sup>-3</sup>  |

**Supplemental Gene List III. Transcriptomal Differences between Basal Cell (BC)-high  
Adenocarcinoma (adenoCa) vs BC-low AdenoCa (cont. page 3)**

| Probe ID    | Gene name                                                                                        | BC-high adenoCa vs BC-low adenoCa |                        |
|-------------|--------------------------------------------------------------------------------------------------|-----------------------------------|------------------------|
|             |                                                                                                  | Fold-change                       | p value                |
| 220651_s_at | MCM10 minichromosome maintenance deficient 10 (S. cerevisiae)                                    | 3.27                              | 5.60x10 <sup>-7</sup>  |
| 221730_at   | collagen, type V, alpha 2                                                                        | 3.27                              | 2.03x10 <sup>-9</sup>  |
| 203362_s_at | MAD2 mitotic arrest deficient-like 1 (yeast)                                                     | 3.25                              | 4.16x10 <sup>-10</sup> |
| 201037_at   | phosphofructokinase, platelet                                                                    | 3.24                              | 9.25x10 <sup>-12</sup> |
| 209800_at   | keratin 16 (focal non-epidermolytic palmoplantar keratoderma)                                    | 3.22                              | 6.10x10 <sup>-4</sup>  |
| 202620_s_at | procollagen-lysine, 2-oxoglutarate 5-dioxygenase 2                                               | 3.21                              | 5.60x10 <sup>-11</sup> |
| 205328_at   | claudin 10                                                                                       | 3.20                              | 2.77x10 <sup>-4</sup>  |
| 204286_s_at | phorbol-12-myristate-13-acetate-induced protein 1                                                | 3.20                              | 2.14x10 <sup>-6</sup>  |
| 206025_s_at | tumor necrosis factor, alpha-induced protein 6                                                   | 3.18                              | 3.23x10 <sup>-11</sup> |
| 210643_at   | tumor necrosis factor (ligand) superfamily, member 11                                            | 3.18                              | 1.70x10 <sup>-4</sup>  |
| 219271_at   | UDP-N-acetyl-alpha-D-galactosamine:polypeptide N-acetylgalactosaminyltransferase 14 (GalNAc-T14) | 3.17                              | 7.01x10 <sup>-4</sup>  |
| 210511_s_at | inhibin, beta A (activin A, activin AB alpha polypeptide)                                        | 3.14                              | 1.14x10 <sup>-5</sup>  |
| 205542_at   | six transmembrane epithelial antigen of the prostate 1                                           | 3.09                              | 9.68x10 <sup>-10</sup> |
| 213008_at   | Fanconi anemia, complementation group I                                                          | 3.02                              | 5.74x10 <sup>-6</sup>  |
| 202828_s_at | matrix metalloproteinase 14 (membrane-inserted)                                                  | 3.00                              | 7.07x10 <sup>-6</sup>  |
| 202997_s_at | lysyl oxidase-like 2                                                                             | 3.00                              | 1.20x10 <sup>-5</sup>  |
| 201387_s_at | ubiquitin carboxyl-terminal esterase L1 (ubiquitin thiolesterase)                                | 2.99                              | 9.72x10 <sup>-6</sup>  |
| 217901_at   | Desmoglein 2                                                                                     | 2.99                              | 3.36x10 <sup>-10</sup> |
| 218663_at   | chromosome condensation protein G                                                                | 2.99                              | 1.23x10 <sup>-7</sup>  |
| 218741_at   | chromosome 22 open reading frame 18                                                              | 2.97                              | 1.21x10 <sup>-6</sup>  |
| 200606_at   | desmoplakin                                                                                      | 2.95                              | 9.91x10 <sup>-9</sup>  |
| 206549_at   | insulin-like 4 (placenta)                                                                        | 2.95                              | 1.62x10 <sup>-3</sup>  |
| 206439_at   | dermatan sulfate proteoglycan 3                                                                  | 2.95                              | 8.52x10 <sup>-4</sup>  |
| 204014_at   | dual specificity phosphatase 4                                                                   | 2.94                              | 1.80x10 <sup>-3</sup>  |
| 210074_at   | cathepsin L2                                                                                     | 2.94                              | 3.90x10 <sup>-8</sup>  |
| 205916_at   | S100 calcium binding protein A7 (psoriasin 1)                                                    | 2.91                              | 6.12x10 <sup>-3</sup>  |
| 204281_at   | TEA domain family member 4                                                                       | 2.90                              | 2.85x10 <sup>-8</sup>  |
| 219148_at   | PDZ binding kinase                                                                               | 2.88                              | 3.71x10 <sup>-7</sup>  |
| 205302_at   | insulin-like growth factor binding protein 1                                                     | 2.88                              | 5.77x10 <sup>-5</sup>  |
| 205767_at   | epiregulin                                                                                       | 2.86                              | 6.08x10 <sup>-3</sup>  |
| 202404_s_at | collagen, type I, alpha 2                                                                        | 2.84                              | 1.72x10 <sup>-8</sup>  |
| 219825_at   | cytochrome P450, family 26, subfamily B, polypeptide 1                                           | 2.83                              | 7.44x10 <sup>-6</sup>  |
| 209596_at   | matrix-remodelling associated 5                                                                  | 2.82                              | 2.28x10 <sup>-7</sup>  |
| 218355_at   | kinesin family member 4A                                                                         | 2.82                              | 7.75x10 <sup>-8</sup>  |



**Supplemental Gene List III. Transcriptomal Differences between Basal Cell (BC)-high  
Adenocarcinoma (adenoCa) vs BC-low AdenoCa (cont. page 4)**

| Probe ID    | Gene name                                                                                     | BC-high adenoCa vs BC-low adenoCa |                        |
|-------------|-----------------------------------------------------------------------------------------------|-----------------------------------|------------------------|
|             |                                                                                               | Fold-change                       | p value                |
| 213523_at   | cyclin E1                                                                                     | 2.80                              | 3.04x10 <sup>-6</sup>  |
| 218843_at   | fibronectin type III domain containing 4                                                      | 2.80                              | 2.27x10 <sup>-7</sup>  |
| 203213_at   | Cell division cycle 2, G1 to S and G2 to M                                                    | 2.80                              | 2.63x10 <sup>-8</sup>  |
| 221436_s_at | cell division cycle associated 3                                                              | 2.80                              | 5.86x10 <sup>-6</sup>  |
| 218990_s_at | small proline-rich protein 3                                                                  | 2.79                              | 1.23x10 <sup>-3</sup>  |
| 203418_at   | cyclin A2                                                                                     | 2.79                              | 5.98x10 <sup>-8</sup>  |
| 209680_s_at | kinesin family member C1                                                                      | 2.78                              | 2.46x10 <sup>-5</sup>  |
| 214710_s_at | cyclin B1                                                                                     | 2.78                              | 2.37x10 <sup>-9</sup>  |
| 201116_s_at | carboxypeptidase E                                                                            | 2.76                              | 6.65x10 <sup>-5</sup>  |
| 202627_s_at | serpin peptidase inhibitor, clade E (nexin, plasminogen activator inhibitor type 1), member 1 | 2.75                              | 1.63x10 <sup>-6</sup>  |
| 205513_at   | transcobalamin I (vitamin B12 binding protein, R binder family)                               | 2.75                              | 6.52x10 <sup>-3</sup>  |
| 204580_at   | matrix metalloproteinase 12 (macrophage elastase)                                             | 2.74                              | 4.59x10 <sup>-4</sup>  |
| 207717_s_at | plakophilin 2                                                                                 | 2.74                              | 6.69x10 <sup>-5</sup>  |
| 220658_s_at | aryl hydrocarbon receptor nuclear translocator-like 2                                         | 2.73                              | 1.29x10 <sup>-8</sup>  |
| 204602_at   | dickkopf homolog 1 ( <i>Xenopus laevis</i> )                                                  | 2.72                              | 8.76x10 <sup>-4</sup>  |
| 211844_s_at | neuropilin 2                                                                                  | 2.71                              | 5.84x10 <sup>-5</sup>  |
| 203560_at   | gamma-glutamyl hydrolase (conjugase, foylpolypolygammaglutamyl hydrolase)                     | 2.71                              | 3.82x10 <sup>-6</sup>  |
| 203967_at   | CDC6 cell division cycle 6 homolog ( <i>S. cerevisiae</i> )                                   | 2.71                              | 3.66x10 <sup>-7</sup>  |
| 203925_at   | glutamate-cysteine ligase, modifier subunit                                                   | 2.69                              | 1.39x10 <sup>-6</sup>  |
| 218880_at   | FOS-like antigen 2                                                                            | 2.68                              | 1.94x10 <sup>-12</sup> |
| 204962_s_at | centromere protein A, 17kDa                                                                   | 2.68                              | 1.54x10 <sup>-6</sup>  |
| 214974_x_at | chemokine (C-X-C motif) ligand 5                                                              | 2.68                              | 3.61x10 <sup>-3</sup>  |
| 206645_s_at | nuclear receptor subfamily 0, group B, member 1                                               | 2.68                              | 3.27x10 <sup>-3</sup>  |
| 203976_s_at | chromatin assembly factor 1, subunit A (p150)                                                 | 2.67                              | 1.63x10 <sup>-5</sup>  |
| 212489_at   | collagen, type V, alpha 1                                                                     | 2.67                              | 1.72x10 <sup>-5</sup>  |
| 209921_at   | solute carrier family 7, (cationic amino acid transporter, y+ system) member 11               | 2.66                              | 9.70x10 <sup>-4</sup>  |
| 205650_s_at | fibrinogen alpha chain                                                                        | 2.66                              | 8.28x10 <sup>-3</sup>  |
| 202705_at   | cyclin B2                                                                                     | 2.65                              | 8.00x10 <sup>-9</sup>  |
| 202094_at   | baculoviral IAP repeat-containing 5 (survivin)                                                | 2.64                              | 2.82x10 <sup>-5</sup>  |
| 202504_at   | tripartite motif-containing 29                                                                | 2.64                              | 1.86x10 <sup>-3</sup>  |
| 221909_at   | ring finger protein, transmembrane 2                                                          | 2.64                              | 6.66x10 <sup>-3</sup>  |
| 204078_at   | synaptonemal complex protein SC65                                                             | 2.64                              | 3.47x10 <sup>-5</sup>  |
| 204146_at   | RAD51 associated protein 1                                                                    | 2.63                              | 3.93x10 <sup>-7</sup>  |
| 201292_at   | topoisomerase (DNA) II alpha 170kDa                                                           | 2.63                              | 1.48x10 <sup>-8</sup>  |

**Supplemental Gene List III. Transcriptomal Differences between Basal Cell (BC)-high  
Adenocarcinoma (adenoCa) vs BC-low AdenoCa (cont. page 5)**

| Probe ID    | Gene name                                                                                            | BC-high adenoCa vs BC-low adenoCa |                        |
|-------------|------------------------------------------------------------------------------------------------------|-----------------------------------|------------------------|
|             |                                                                                                      | Fold-change                       | p value                |
| 212110_at   | solute carrier family 39 (zinc transporter), member 14                                               | 2.63                              | 2.33x10 <sup>-8</sup>  |
| 202267_at   | laminin, gamma 2                                                                                     | 2.62                              | 6.05x10 <sup>-5</sup>  |
| 204933_s_at | tumor necrosis factor receptor superfamily, member 11b (osteoprotegerin)                             | 2.61                              | 1.87x10 <sup>-3</sup>  |
| 219787_s_at | epithelial cell transforming sequence 2 oncogene                                                     | 2.61                              | 6.99x10 <sup>-8</sup>  |
| 219936_s_at | G protein-coupled receptor 87                                                                        | 2.61                              | 4.31x10 <sup>-3</sup>  |
| 208103_s_at | acidic (leucine-rich) nuclear phosphoprotein 32 family, member E                                     | 2.60                              | 1.45x10 <sup>-7</sup>  |
| 204709_s_at | kinesin family member 23                                                                             | 2.60                              | 4.89x10 <sup>-5</sup>  |
| 211756_at   | parathyroid hormone-like hormone                                                                     | 2.60                              | 1.12x10 <sup>-3</sup>  |
| 210683_at   | neurturin                                                                                            | 2.59                              | 1.93x10 <sup>-4</sup>  |
| 201266_at   | thioredoxin reductase 1                                                                              | 2.59                              | 1.54x10 <sup>-7</sup>  |
| 202219_at   | solute carrier family 6 (neurotransmitter transporter, creatine), member 8                           | 2.59                              | 1.23x10 <sup>-3</sup>  |
| 203764_at   | discs, large homolog 7 (Drosophila)                                                                  | 2.58                              | 4.47x10 <sup>-9</sup>  |
| 214469_at   | histone 1, H2ae                                                                                      | 2.55                              | 5.85x10 <sup>-3</sup>  |
| 203691_at   | peptidase inhibitor 3, skin-derived (SKALP)                                                          | 2.55                              | 7.14x10 <sup>-3</sup>  |
| 206074_s_at | high mobility group AT-hook 1                                                                        | 2.55                              | 1.75x10 <sup>-10</sup> |
| 204822_at   | TTK protein kinase                                                                                   | 2.55                              | 5.73x10 <sup>-8</sup>  |
| 214240_at   | galanin                                                                                              | 2.55                              | 4.17x10 <sup>-5</sup>  |
| 214639_s_at | homeo box A1                                                                                         | 2.54                              | 3.21x10 <sup>-3</sup>  |
| 208607_s_at | serum amyloid A1 ; serum amyloid A2                                                                  | 2.53                              | 4.61x10 <sup>-3</sup>  |
| 222037_at   | MCM4 minichromosome maintenance deficient 4 (S. cerevisiae)                                          | 2.53                              | 5.08x10 <sup>-6</sup>  |
| 204766_s_at | nudix (nucleoside diphosphate linked moiety X)-type motif 1                                          | 2.52                              | 1.67x10 <sup>-4</sup>  |
| 218009_s_at | protein regulator of cytokinesis 1                                                                   | 2.51                              | 2.73x10 <sup>-8</sup>  |
| 205924_at   | RAB3B, member RAS oncogene family                                                                    | 2.51                              | 1.78x10 <sup>-4</sup>  |
| 202912_at   | adrenomedullin                                                                                       | 2.50                              | 4.11x10 <sup>-6</sup>  |
| 218944_at   | pyrroline-5-carboxylate reductase-like                                                               | 2.50                              | 2.04x10 <sup>-4</sup>  |
| 201761_at   | methylenetetrahydrofolate dehydrogenase (NADP+ dependent) 2, methenyltetrahydrofolate cyclohydrolase | 2.50                              | 2.50x10 <sup>-9</sup>  |
| 207165_at   | hyaluronan-mediated motility receptor (RHAMM)                                                        | 2.50                              | 5.84x10 <sup>-7</sup>  |
| 204430_s_at | solute carrier family 2 (facilitated glucose/fructose transporter), member 5                         | 2.49                              | 2.22x10 <sup>-4</sup>  |
| 203699_s_at | deiodinase, iodothyronine, type II                                                                   | 2.49                              | 1.33x10 <sup>-3</sup>  |
| 221539_at   | eukaryotic translation initiation factor 4E binding protein 1                                        | 2.49                              | 3.91x10 <sup>-7</sup>  |

**Supplemental Gene List III. Transcriptomal Differences between Basal Cell (BC)-high  
Adenocarcinoma (adenoCa) vs BC-low AdenoCa (cont. page 6)**

| Probe ID    | Gene name                                                                                  | BC-high adenoCa vs BC-low adenoCa |                       |
|-------------|--------------------------------------------------------------------------------------------|-----------------------------------|-----------------------|
|             |                                                                                            | Fold-change                       | p value               |
| 219650_at   | excision repair cross-complementing rodent repair deficiency, complementation group 6-like | 2.48                              | 4.91x10 <sup>-5</sup> |
| 204879_at   | podoplanin                                                                                 | 2.48                              | 1.87x10 <sup>-3</sup> |
| 210145_at   | phospholipase A2, group IVA (cytosolic, calcium-dependent)                                 | 2.47                              | 5.02x10 <sup>-4</sup> |
| 206067_s_at | Wilms tumor 1                                                                              | 2.47                              | 6.08x10 <sup>-3</sup> |
| 202589_at   | thymidylate synthetase                                                                     | 2.47                              | 2.00x10 <sup>-8</sup> |
| 213909_at   | leucine rich repeat containing 15                                                          | 2.47                              | 6.91x10 <sup>-5</sup> |
| 214463_x_at | histone 1, H4k ; histone 1, H4j                                                            | 2.46                              | 8.43x10 <sup>-5</sup> |
| 202954_at   | ubiquitin-conjugating enzyme E2C                                                           | 2.46                              | 3.90x10 <sup>-8</sup> |
| 204385_at   | kynureninase (L-kynurenine hydrolase)                                                      | 2.46                              | 8.37x10 <sup>-5</sup> |
| 205499_at   | sushi-repeat-containing protein, X-linked 2                                                | 2.46                              | 1.72x10 <sup>-5</sup> |
| 211150_s_at | dihydrolipoamide S-acetyltransferase (E2 component of pyruvate dehydrogenase complex)      | 2.46                              | 6.15x10 <sup>-5</sup> |
| 209372_x_at | tubulin, beta 2 ; tubulin, beta polypeptide paralog                                        | 2.46                              | 2.57x10 <sup>-4</sup> |
| 203083_at   | thrombospondin 2                                                                           | 2.45                              | 3.79x10 <sup>-6</sup> |
| 201629_s_at | acid phosphatase 1, soluble                                                                | 2.45                              | 8.64x10 <sup>-7</sup> |
| 208079_s_at | serine/threonine kinase 6                                                                  | 2.44                              | 6.09x10 <sup>-8</sup> |
| 213640_s_at | lysyl oxidase                                                                              | 2.44                              | 9.41x10 <sup>-5</sup> |
| 214290_s_at | histone 2, H2aa                                                                            | 2.44                              | 3.19x10 <sup>-5</sup> |
| 213943_at   | twist homolog 1 (acrocephalosyndactyly 3; Saethre-Chotzen syndrome) (Drosophila)           | 2.43                              | 2.93x10 <sup>-6</sup> |
| 205568_at   | aquaporin 9                                                                                | 2.43                              | 4.08x10 <sup>-4</sup> |
| 204344_s_at | Sec23 homolog A (S. cerevisiae)                                                            | 2.43                              | 2.26x10 <sup>-5</sup> |
| 215076_s_at | collagen, type III, alpha 1 (Ehlers-Danlos syndrome type IV, autosomal dominant)           | 2.42                              | 1.35x10 <sup>-7</sup> |
| 217640_x_at | chromosome 18 open reading frame 24                                                        | 2.41                              | 1.58x10 <sup>-3</sup> |
| 219249_s_at | FK506 binding protein 10, 65 kDa                                                           | 2.41                              | 4.54x10 <sup>-4</sup> |
| 206391_at   | retinoic acid receptor responder (tazarotene induced) 1                                    | 2.41                              | 3.72x10 <sup>-3</sup> |
| 219032_x_at | opsin 3 (encephalopsin, panopsin)                                                          | 2.40                              | 3.71x10 <sup>-8</sup> |
| 202765_s_at | fibrillin 1 (Marfan syndrome)                                                              | 2.39                              | 3.05x10 <sup>-3</sup> |
| 203440_at   | cadherin 2, type 1, N-cadherin (neuronal)                                                  | 2.39                              | 4.98x10 <sup>-3</sup> |
| 212396_s_at | KIAA0090                                                                                   | 2.39                              | 1.46x10 <sup>-3</sup> |
| 204558_at   | RAD54-like (S. cerevisiae)                                                                 | 2.39                              | 1.37x10 <sup>-4</sup> |
| 205240_at   | G-protein signalling modulator 2 (AGS3-like, C. elegans)                                   | 2.39                              | 2.55x10 <sup>-4</sup> |
| 220789_s_at | transforming growth factor beta regulator 4                                                | 2.39                              | 9.70x10 <sup>-6</sup> |
| 212942_s_at | KIAA1199                                                                                   | 2.38                              | 4.55x10 <sup>-5</sup> |
| 219232_s_at | egl nine homolog 3 (C. elegans)                                                            | 2.38                              | 2.09x10 <sup>-6</sup> |

**Supplemental Gene List III. Transcriptomal Differences between Basal Cell (BC)-high Adenocarcinoma (adenoCa) vs BC-low AdenoCa (cont. page 7)**

| Probe ID    | Gene name                                                                                      | BC-high adenoCa vs BC-low adenoCa |                       |
|-------------|------------------------------------------------------------------------------------------------|-----------------------------------|-----------------------|
|             |                                                                                                | Fold-change                       | p value               |
| 204026_s_at | ZW10 interactor                                                                                | 2.38                              | 3.07x10 <sup>-7</sup> |
| 220442_at   | UDP-N-acetyl-alpha-D-galactosamine:polypeptide N-acetylgalactosaminyltransferase 4 (GalNAc-T4) | 2.37                              | 3.19x10 <sup>-6</sup> |
| 209955_s_at | fibroblast activation protein, alpha                                                           | 2.37                              | 6.50x10 <sup>-8</sup> |
| 217818_s_at | actin related protein 2/3 complex, subunit 4, 20kDa                                            | 2.37                              | 8.24x10 <sup>-4</sup> |
| 203477_at   | collagen, type XV, alpha 1                                                                     | 2.37                              | 5.63x10 <sup>-5</sup> |
| 202240_at   | polo-like kinase 1 (Drosophila)                                                                | 2.37                              | 9.87x10 <sup>-6</sup> |
| 219926_at   | popeye domain containing 3                                                                     | 2.36                              | 2.62x10 <sup>-3</sup> |
| 209875_s_at | secreted phosphoprotein 1 (osteopontin, bone sialoprotein I, early T-lymphocyte activation 1)  | 2.35                              | 7.48x10 <sup>-4</sup> |
| 218585_s_at | denticleless homolog (Drosophila)                                                              | 2.35                              | 3.63x10 <sup>-7</sup> |
| 211148_s_at | angiopoietin 2                                                                                 | 2.35                              | 4.16x10 <sup>-4</sup> |
| 205071_x_at | X-ray repair complementing defective repair in Chinese hamster cells 4                         | 2.34                              | 8.24x10 <sup>-4</sup> |
| 202949_s_at | four and a half LIM domains 2                                                                  | 2.33                              | 2.33x10 <sup>-6</sup> |
| 209270_at   | laminin, beta 3                                                                                | 2.33                              | 1.92x10 <sup>-4</sup> |
| 220254_at   | low density lipoprotein-related protein 12                                                     | 2.32                              | 2.43x10 <sup>-3</sup> |
| 209714_s_at | cyclin-dependent kinase inhibitor 3 (CDK2-associated dual specificity phosphatase)             | 2.32                              | 1.91x10 <sup>-9</sup> |
| 213139_at   | snail homolog 2 (Drosophila)                                                                   | 2.32                              | 1.21x10 <sup>-5</sup> |
| 202503_s_at | KIAA0101                                                                                       | 2.32                              | 9.83x10 <sup>-7</sup> |
| 40472_at    | PLSC domain containing protein                                                                 | 2.32                              | 2.14x10 <sup>-4</sup> |
| 201489_at   | peptidylprolyl isomerase F (cyclophilin F)                                                     | 2.31                              | 4.42x10 <sup>-8</sup> |
| 219410_at   | transmembrane protein 45A                                                                      | 2.31                              | 4.96x10 <sup>-5</sup> |
| 204714_s_at | coagulation factor V (proaccelerin, labile factor)                                             | 2.31                              | 1.07x10 <sup>-3</sup> |
| 213680_at   | keratin 6B                                                                                     | 2.31                              | 3.01x10 <sup>-3</sup> |
| 213765_at   | microfibrillar associated protein 5                                                            | 2.30                              | 1.81x10 <sup>-3</sup> |
| 205266_at   | leukemia inhibitory factor (cholinergic differentiation factor)                                | 2.30                              | 3.68x10 <sup>-5</sup> |
| 204170_s_at | CDC28 protein kinase regulatory subunit 2                                                      | 2.30                              | 7.33x10 <sup>-8</sup> |
| 219366_at   | apoptosis, caspase activation inhibitor                                                        | 2.30                              | 1.10x10 <sup>-8</sup> |
| 203755_at   | BUB1 budding uninhibited by benzimidazoles 1 homolog beta (yeast)                              | 2.29                              | 1.68x10 <sup>-8</sup> |
| 217428_s_at | collagen, type X, alpha 1(Schmid metaphyseal chondrodysplasia)                                 | 2.29                              | 4.33x10 <sup>-3</sup> |
| 205229_s_at | coagulation factor C homolog, coxlin (Limulus polyphemus)                                      | 2.29                              | 2.98x10 <sup>-3</sup> |

**Supplemental Gene List III. Transcriptomal Differences between Basal Cell (BC)-high  
Adenocarcinoma (adenoCa) vs BC-low AdenoCa (cont. page 8)**

| Probe ID    | Gene name                                                                                               | BC-high adenoCa vs BC-low adenoCa |                       |
|-------------|---------------------------------------------------------------------------------------------------------|-----------------------------------|-----------------------|
|             |                                                                                                         | Fold-change                       | p value               |
| 201195_s_at | solute carrier family 7 (cationic amino acid transporter, y+ system), member 5                          | 2.28                              | 1.06x10 <sup>-3</sup> |
| 204256_at   | ELOVL family member 6, elongation of long chain fatty acids (FEN1/Elo2, SUR4/Elo3-like, yeast)          | 2.28                              | 2.11x10 <sup>-6</sup> |
| 222206_s_at | nicalin homolog (zebrafish)                                                                             | 2.28                              | 1.40x10 <sup>-4</sup> |
| 216913_s_at | KIAA0690                                                                                                | 2.27                              | 3.39x10 <sup>-4</sup> |
| 204033_at   | thyroid hormone receptor interactor 13                                                                  | 2.27                              | 3.82x10 <sup>-6</sup> |
| 204748_at   | prostaglandin-endoperoxide synthase 2 (prostaglandin G/H synthase and cyclooxygenase)                   | 2.27                              | 9.15x10 <sup>-3</sup> |
| 217755_at   | hematological and neurological expressed 1                                                              | 2.26                              | 9.28x10 <sup>-8</sup> |
| 210135_s_at | short stature homeobox 2                                                                                | 2.26                              | 1.36x10 <sup>-3</sup> |
| 201930_at   | MCM6 minichromosome maintenance deficient 6 (MIS5 homolog, <i>S. pombe</i> ) ( <i>S. cerevisiae</i> )   | 2.26                              | 5.44x10 <sup>-9</sup> |
| 202499_s_at | solute carrier family 2 (facilitated glucose transporter), member 3                                     | 2.26                              | 3.77x10 <sup>-6</sup> |
| 201897_s_at | CDC28 protein kinase regulatory subunit 1B                                                              | 2.25                              | 6.15x10 <sup>-9</sup> |
| 204444_at   | kinesin family member 11                                                                                | 2.25                              | 8.95x10 <sup>-8</sup> |
| 217312_s_at | collagen, type VII, alpha 1 (epidermolysis bullosa, dystrophic, dominant and recessive)                 | 2.25                              | 1.07x10 <sup>-3</sup> |
| 205207_at   | interleukin 6 (interferon, beta 2)                                                                      | 2.25                              | 7.02x10 <sup>-6</sup> |
| 202923_s_at | glutamate-cysteine ligase, catalytic subunit                                                            | 2.25                              | 4.35x10 <sup>-5</sup> |
| 204114_at   | nidogen 2 (osteonidogen)                                                                                | 2.25                              | 1.95x10 <sup>-5</sup> |
| 205535_s_at | BH-protocadherin (brain-heart)                                                                          | 2.25                              | 4.25x10 <sup>-3</sup> |
| 218975_at   | collagen, type V, alpha 3                                                                               | 2.24                              | 3.08x10 <sup>-4</sup> |
| 211564_s_at | PDZ and LIM domain 4                                                                                    | 2.24                              | 8.35x10 <sup>-4</sup> |
| 218245_at   | leucine rich repeat containing 54                                                                       | 2.24                              | 6.07x10 <sup>-5</sup> |
| 205394_at   | CHK1 checkpoint homolog ( <i>S. pombe</i> )                                                             | 2.24                              | 3.66x10 <sup>-7</sup> |
| 204457_s_at | growth arrest-specific 1                                                                                | 2.24                              | 4.54x10 <sup>-3</sup> |
| 212022_s_at | antigen identified by monoclonal antibody Ki-67                                                         | 2.24                              | 3.26x10 <sup>-6</sup> |
| 211071_s_at | myeloid/lymphoid or mixed-lineage leukemia (trithorax homolog, <i>Drosophila</i> ); translocated to, 11 | 2.23                              | 9.84x10 <sup>-6</sup> |
| 219634_at   | carbohydrate (chondroitin 4) sulfotransferase 11                                                        | 2.23                              | 1.52x10 <sup>-6</sup> |
| 221781_s_at | DnaJ (Hsp40) homolog, subfamily C, member 10                                                            | 2.23                              | 3.71x10 <sup>-8</sup> |
| 218653_at   | solute carrier family 25 (mitochondrial carrier; ornithine transporter) member 15                       | 2.23                              | 7.41x10 <sup>-6</sup> |
| 205460_at   | neuronal PAS domain protein 2                                                                           | 2.22                              | 2.49x10 <sup>-3</sup> |
| 219201_s_at | twisted gastrulation homolog 1 ( <i>Drosophila</i> )                                                    | 2.22                              | 3.28x10 <sup>-3</sup> |
| 222077_s_at | Rac GTPase activating protein 1                                                                         | 2.22                              | 2.40x10 <sup>-7</sup> |

**Supplemental Gene List III. Transcriptomal Differences between Basal Cell (BC)-high  
Adenocarcinoma (adenoCa) vs BC-low AdenoCa (cont. page 9)**

| Probe ID    | Gene name                                                                                 | BC-high adenoCa vs BC-low adenoCa |                        |
|-------------|-------------------------------------------------------------------------------------------|-----------------------------------|------------------------|
|             |                                                                                           | Fold-change                       | p value                |
| 212242_at   | tubulin, alpha 1 (testis specific)                                                        | 2.22                              | 2.79x10 <sup>-10</sup> |
| 211088_s_at | polo-like kinase 4 (Drosophila)                                                           | 2.22                              | 1.58x10 <sup>-3</sup>  |
| 214702_at   | fibronectin 1                                                                             | 2.22                              | 2.87x10 <sup>-4</sup>  |
| 202458_at   | protease, serine, 23                                                                      | 2.21                              | 1.12x10 <sup>-5</sup>  |
| 221777_at   | chromosome 12 open reading frame 52                                                       | 2.21                              | 3.88x10 <sup>-4</sup>  |
| 204338_s_at | regulator of G-protein signalling 4                                                       | 2.20                              | 9.99x10 <sup>-3</sup>  |
| 206364_at   | kinesin family member 14                                                                  | 2.20                              | 1.03x10 <sup>-6</sup>  |
| 208850_s_at | Thy-1 cell surface antigen                                                                | 2.20                              | 8.71x10 <sup>-6</sup>  |
| 220093_at   | anthrax toxin receptor 1                                                                  | 2.20                              | 7.35x10 <sup>-4</sup>  |
| 222039_at   | kinesin family member 18B                                                                 | 2.20                              | 8.84x10 <sup>-7</sup>  |
| 214845_s_at | calumenin                                                                                 | 2.20                              | 9.09x10 <sup>-8</sup>  |
| 215223_s_at | superoxide dismutase 2, mitochondrial                                                     | 2.20                              | 3.05x10 <sup>-5</sup>  |
| 202154_x_at | tubulin, beta 3                                                                           | 2.19                              | 4.03x10 <sup>-13</sup> |
| 204401_at   | potassium intermediate/small conductance calcium-activated channel, subfamily N, member 4 | 2.19                              | 2.13x10 <sup>-4</sup>  |
| 209406_at   | BCL2-associated athanogene 2                                                              | 2.19                              | 5.12x10 <sup>-6</sup>  |
| 204597_x_at | stanniocalcin 1                                                                           | 2.19                              | 1.31x10 <sup>-5</sup>  |
| 206595_at   | cystatin E/M                                                                              | 2.19                              | 5.96x10 <sup>-3</sup>  |
| 218498_s_at | ERO1-like (S. cerevisiae)                                                                 | 2.18                              | 5.24x10 <sup>-8</sup>  |
| 219874_at   | solute carrier family 12 (potassium/chloride transporters), member 8                      | 2.18                              | 1.40x10 <sup>-7</sup>  |
| 216228_s_at | WD repeat and HMG-box DNA binding protein 1                                               | 2.18                              | 2.68x10 <sup>-4</sup>  |
| 205774_at   | coagulation factor XII (Hageman factor)                                                   | 2.17                              | 1.22x10 <sup>-4</sup>  |
| 204941_s_at | aldehyde dehydrogenase 3 family, member B2                                                | 2.16                              | 9.75x10 <sup>-3</sup>  |
| 209877_at   | synuclein, gamma (breast cancer-specific protein 1)                                       | 2.16                              | 3.50x10 <sup>-4</sup>  |
| 202338_at   | thymidine kinase 1, soluble                                                               | 2.15                              | 1.77x10 <sup>-8</sup>  |
| 205691_at   | synaptogyrin 3                                                                            | 2.15                              | 2.00x10 <sup>-3</sup>  |
| 206079_at   | choroideremia-like (Rab escort protein 2)                                                 | 2.15                              | 8.00x10 <sup>-5</sup>  |
| 218644_at   | pleckstrin 2                                                                              | 2.15                              | 9.70x10 <sup>-6</sup>  |
| 203936_s_at | matrix metalloproteinase 9 (gelatinase B, 92kDa gelatinase, 92kDa type IV collagenase)    | 2.15                              | 8.34x10 <sup>-4</sup>  |
| 210095_s_at | insulin-like growth factor binding protein 3                                              | 2.15                              | 4.17x10 <sup>-5</sup>  |
| 218883_s_at | MLF1 interacting protein                                                                  | 2.14                              | 1.45x10 <sup>-6</sup>  |
| 219270_at   | ChaC, cation transport regulator homolog 1 (E. coli)                                      | 2.14                              | 6.61x10 <sup>-5</sup>  |
| 214866_at   | plasminogen activator, urokinase receptor                                                 | 2.13                              | 6.57x10 <sup>-9</sup>  |
| 221591_s_at | family with sequence similarity 64, member A                                              | 2.13                              | 5.84x10 <sup>-6</sup>  |
| 200853_at   | H2A histone family, member Z                                                              | 2.12                              | 1.22x10 <sup>-8</sup>  |
| 209464_at   | aurora kinase B                                                                           | 2.12                              | 1.45x10 <sup>-5</sup>  |

**Supplemental Gene List III. Transcriptomal Differences between Basal Cell (BC)-high  
Adenocarcinoma (adenoCa) vs BC-low AdenoCa (cont. page 10)**

| Probe ID    | Gene name                                                                               | BC-high adenoCa vs BC-low adenoCa |                        |
|-------------|-----------------------------------------------------------------------------------------|-----------------------------------|------------------------|
|             |                                                                                         | Fold-change                       | p value                |
| 209850_s_at | CDC42 effector protein (Rho GTPase binding) 2                                           | 2.12                              | 1.83x10 <sup>-5</sup>  |
| 220198_s_at | eukaryotic translation initiation factor 5A2                                            | 2.12                              | 1.37x10 <sup>-4</sup>  |
| 213520_at   | RecQ protein-like 4                                                                     | 2.11                              | 2.25x10 <sup>-3</sup>  |
| 219311_at   | chromosome 18 open reading frame 9                                                      | 2.11                              | 1.32x10 <sup>-5</sup>  |
| 210397_at   | defensin, beta 1                                                                        | 2.11                              | 4.58x10 <sup>-3</sup>  |
| 218980_at   | formin homology 2 domain containing 3                                                   | 2.11                              | 9.55x10 <sup>-3</sup>  |
| 221598_s_at | cofactor required for Sp1 transcriptional activation, subunit 8, 34kDa                  | 2.11                              | 8.23x10 <sup>-4</sup>  |
| 209832_s_at | DNA replication factor                                                                  | 2.11                              | 1.33x10 <sup>-4</sup>  |
| 218046_s_at | mitochondrial ribosomal protein S16                                                     | 2.11                              | 2.26x10 <sup>-6</sup>  |
| 201506_at   | transforming growth factor, beta-induced, 68kDa                                         | 2.11                              | 1.72x10 <sup>-5</sup>  |
| 204427_s_at | transmembrane emp24 domain trafficking protein 2                                        | 2.10                              | 6.58x10 <sup>-5</sup>  |
| 209408_at   | kinesin family member 2C                                                                | 2.10                              | 1.41x10 <sup>-8</sup>  |
| 203270_at   | deoxythymidylate kinase (thymidylate kinase)                                            | 2.10                              | 8.13x10 <sup>-7</sup>  |
| 201105_at   | lectin, galactoside-binding, soluble, 1 (galectin 1)                                    | 2.10                              | 1.23x10 <sup>-8</sup>  |
| 214981_at   | Periostin, osteoblast specific factor                                                   | 2.10                              | 7.99x10 <sup>-3</sup>  |
| 205085_at   | origin recognition complex, subunit 1-like (yeast)                                      | 2.10                              | 1.08x10 <sup>-3</sup>  |
| 206103_at   | ras-related C3 botulinum toxin substrate 3 (rho family, small GTP binding protein Rac3) | 2.09                              | 7.21x10 <sup>-4</sup>  |
| 209156_s_at | collagen, type VI, alpha 2                                                              | 2.09                              | 1.36x10 <sup>-5</sup>  |
| 207828_s_at | centromere protein F, 350/400ka (mitosin)                                               | 2.09                              | 5.20x10 <sup>-6</sup>  |
| 219493_at   | SHC SH2-domain binding protein 1                                                        | 2.09                              | 1.21x10 <sup>-6</sup>  |
| 210138_at   | regulator of G-protein signalling 20                                                    | 2.09                              | 5.40x10 <sup>-3</sup>  |
| 217996_at   | pleckstrin homology-like domain, family A, member 1                                     | 2.09                              | 1.85x10 <sup>-6</sup>  |
| 221410_x_at | protocadherin beta 3                                                                    | 2.09                              | 3.19x10 <sup>-3</sup>  |
| 220124_at   | giant axonal neuropathy (gigaxonin)                                                     | 2.08                              | 7.57x10 <sup>-5</sup>  |
| 201940_at   | carboxypeptidase D                                                                      | 2.08                              | 1.54x10 <sup>-5</sup>  |
| 218039_at   | nucleolar and spindle associated protein 1                                              | 2.08                              | 5.65x10 <sup>-8</sup>  |
| 221845_s_at | ClpB caseinolytic peptidase B homolog (E. coli)                                         | 2.08                              | 4.07x10 <sup>-3</sup>  |
| 221291_at   | UL16 binding protein 2                                                                  | 2.07                              | 1.89x10 <sup>-3</sup>  |
| 202990_at   | phosphorylase, glycogen; liver (Hers disease, glycogen storage disease type VI)         | 2.07                              | 1.64x10 <sup>-7</sup>  |
| 206389_s_at | phosphodiesterase 3A, cGMP-inhibited                                                    | 2.07                              | 6.55x10 <sup>-3</sup>  |
| 217744_s_at | PERP, TP53 apoptosis effector                                                           | 2.07                              | 1.12x10 <sup>-6</sup>  |
| 218782_s_at | ATPase family, AAA domain containing 2                                                  | 2.07                              | 2.06x10 <sup>-5</sup>  |
| 205066_s_at | ectonucleotide pyrophosphatase/phosphodiesterase 1                                      | 2.06                              | 1.21x10 <sup>-3</sup>  |
| 208696_at   | chaperonin containing TCP1, subunit 5 (epsilon)                                         | 2.06                              | 1.48x10 <sup>-8</sup>  |
| 205436_s_at | H2A histone family, member X                                                            | 2.06                              | 9.68x10 <sup>-10</sup> |

**Supplemental Gene List III. Transcriptomal Differences between Basal Cell (BC)-high  
Adenocarcinoma (adenoCa) vs BC-low AdenoCa (cont. page 11)**

| Probe ID    | Gene name                                                                           | BC-high adenoCa vs BC-low adenoCa |                        |
|-------------|-------------------------------------------------------------------------------------|-----------------------------------|------------------------|
|             |                                                                                     | Fold-change                       | p value                |
| 210115_at   | ribosomal protein L39-like                                                          | 2.06                              | 4.61x10 <sup>-3</sup>  |
| 201504_s_at | translin                                                                            | 2.06                              | 2.95x10 <sup>-4</sup>  |
| 205780_at   | BCL2-interacting killer (apoptosis-inducing)                                        | 2.06                              | 3.10x10 <sup>-3</sup>  |
| 37145_at    | granulysin                                                                          | 2.06                              | 4.26x10 <sup>-3</sup>  |
| 209803_s_at | pleckstrin homology-like domain, family A, member 2                                 | 2.06                              | 2.77x10 <sup>-5</sup>  |
| 205552_s_at | 2',5'-oligoadenylate synthetase 1, 40/46kDa                                         | 2.06                              | 1.77x10 <sup>-4</sup>  |
| 221261_x_at | melanoma antigen family D, 4 ; melanoma antigen family D, 4                         | 2.05                              | 9.60x10 <sup>-3</sup>  |
| 201268_at   | non-metastatic cells 2, protein (NM23B) expressed in                                | 2.05                              | 4.03x10 <sup>-13</sup> |
| 214581_x_at | tumor necrosis factor receptor superfamily, member 21                               | 2.05                              | 9.32x10 <sup>-5</sup>  |
| 205796_at   | t-complex 11 (mouse) like 1                                                         | 2.04                              | 1.79x10 <sup>-5</sup>  |
| 210517_s_at | A kinase (PRKA) anchor protein (gravin) 12                                          | 2.04                              | 3.68x10 <sup>-4</sup>  |
| 202483_s_at | RAN binding protein 1                                                               | 2.04                              | 3.61x10 <sup>-8</sup>  |
| 204470_at   | chemokine (C-X-C motif) ligand 1 (melanoma growth stimulating activity, alpha)      | 2.04                              | 2.90x10 <sup>-3</sup>  |
| 204750_s_at | desmocollin 2                                                                       | 2.04                              | 1.21x10 <sup>-4</sup>  |
| 209122_at   | adipose differentiation-related protein                                             | 2.04                              | 7.91x10 <sup>-6</sup>  |
| 201755_at   | MCM5 minichromosome maintenance deficient 5, cell division cycle 46 (S. cerevisiae) | 2.04                              | 2.57x10 <sup>-3</sup>  |
| 212481_s_at | tropomyosin 4                                                                       | 2.03                              | 9.68x10 <sup>-10</sup> |
| 209260_at   | stratifin                                                                           | 2.03                              | 4.64x10 <sup>-4</sup>  |
| 208511_at   | pituitary tumor-transforming 3                                                      | 2.03                              | 4.67x10 <sup>-4</sup>  |
| 219532_at   | elongation of very long chain fatty acids (FEN1/Elo2, SUR4/Elo3, yeast)-like 4      | 2.03                              | 7.93x10 <sup>-3</sup>  |
| 201263_at   | threonyl-tRNA synthetase                                                            | 2.02                              | 3.06x10 <sup>-9</sup>  |
| 204341_at   | tripartite motif-containing 16 ; tripartite motif containing 16-like                | 2.02                              | 1.13x10 <sup>-5</sup>  |
| 220532_s_at | LR8 protein                                                                         | 2.02                              | 2.20x10 <sup>-4</sup>  |
| 203414_at   | monocyte to macrophage differentiation-associated                                   | 2.02                              | 6.09x10 <sup>-8</sup>  |
| 205574_x_at | bone morphogenetic protein 1                                                        | 2.02                              | 5.64x10 <sup>-7</sup>  |
| 209567_at   | RRS1 ribosome biogenesis regulator homolog (S. cerevisiae)                          | 2.02                              | 1.68x10 <sup>-5</sup>  |
| 219257_s_at | sphingosine kinase 1                                                                | 2.02                              | 2.17x10 <sup>-9</sup>  |
| 202431_s_at | v-myc myelocytomatosis viral oncogene homolog (avian)                               | 2.02                              | 3.67x10 <sup>-4</sup>  |
| 217738_at   | pre-B-cell colony enhancing factor 1                                                | 2.02                              | 4.80x10 <sup>-6</sup>  |
| 208381_s_at | sphingosine-1-phosphate lyase 1                                                     | 2.02                              | 2.34x10 <sup>-3</sup>  |
| 209642_at   | BUB1 budding uninhibited by benzimidazoles 1 homolog (yeast)                        | 2.02                              | 2.34x10 <sup>-6</sup>  |



**Supplemental Gene List III. Transcriptomal Differences between Basal Cell (BC)-high  
Adenocarcinoma (adenoCa) vs BC-low AdenoCa (cont. page 12)**

| Probe ID                          | Gene name                                                                | BC-high adenoCa vs BC-low adenoCa |                        |
|-----------------------------------|--------------------------------------------------------------------------|-----------------------------------|------------------------|
|                                   |                                                                          | Fold-change                       | p value                |
| 201577_at                         | non-metastatic cells 1, protein (NM23A) expressed in                     | 2.01                              | 1.43x10 <sup>-8</sup>  |
| 211762_s_at                       | karyopherin alpha 2 (RAG cohort 1, importin alpha 1)                     | 2.01                              | 1.68x10 <sup>-8</sup>  |
| 207463_x_at                       | protease, serine, 3 (mesotrypsin)                                        | 2.01                              | 9.83x10 <sup>-3</sup>  |
| AFFX-<br>HUMGAPDH<br>/M33197_5_at | glyceraldehyde-3-phosphate dehydrogenase                                 | 2.01                              | 1.52x10 <sup>-11</sup> |
| 204817_at                         | extra spindle poles like 1 ( <i>S. cerevisiae</i> )                      | 2.01                              | 4.66x10 <sup>-4</sup>  |
| 202235_at                         | solute carrier family 16 (monocarboxylic acid transporters), member 1    | 2.01                              | 4.09x10 <sup>-3</sup>  |
| 202755_s_at                       | glypican 1                                                               | 2.01                              | 4.38x10 <sup>-3</sup>  |
| 213599_at                         | Opa interacting protein 5                                                | 2.00                              | 1.54x10 <sup>-6</sup>  |
| 217919_s_at                       | mitochondrial ribosomal protein L42                                      | 2.00                              | 3.03x10 <sup>-8</sup>  |
| 217785_s_at                       | SNARE protein Ykt6                                                       | 2.00                              | 3.26x10 <sup>-6</sup>  |
| 203799_at                         | CD302 antigen                                                            | 0.50                              | 7.83x10 <sup>-4</sup>  |
| 205671_s_at                       | major histocompatibility complex, class II, DO beta                      | 0.50                              | 5.06x10 <sup>-4</sup>  |
| 209807_s_at                       | nuclear factor I/X (CCAAT-binding transcription factor)                  | 0.50                              | 1.12x10 <sup>-3</sup>  |
| 214053_at                         | V-erb-a erythroblastic leukemia viral oncogene homolog 4 (avian)         | 0.50                              | 8.72x10 <sup>-8</sup>  |
| 216278_at                         | KIAA0256 gene product                                                    | 0.50                              | 4.17x10 <sup>-3</sup>  |
| 209829_at                         | chromosome 6 open reading frame 32                                       | 0.50                              | 9.54x10 <sup>-4</sup>  |
| 211466_at                         | nuclear factor I/B                                                       | 0.50                              | 2.12x10 <sup>-3</sup>  |
| 213856_at                         | CD47 antigen (Rh-related antigen, integrin-associated signal transducer) | 0.50                              | 5.45x10 <sup>-3</sup>  |
| 204266_s_at                       | choline kinase alpha                                                     | 0.50                              | 9.58x10 <sup>-7</sup>  |
| 210051_at                         | Rap guanine nucleotide exchange factor (GEF) 3                           | 0.50                              | 3.20x10 <sup>-3</sup>  |
| 213472_at                         | heterogeneous nuclear ribonucleoprotein H1 (H)                           | 0.50                              | 1.02x10 <sup>-3</sup>  |
| 215314_at                         | Ankyrin 3, node of Ranvier (ankyrin G)                                   | 0.50                              | 5.64x10 <sup>-6</sup>  |
| 210108_at                         | calcium channel, voltage-dependent, L type, alpha 1D subunit             | 0.50                              | 9.51x10 <sup>-4</sup>  |
| 203365_s_at                       | matrix metalloproteinase 15 (membrane-inserted)                          | 0.50                              | 6.05x10 <sup>-3</sup>  |
| 203994_s_at                       | chromosome 21 open reading frame 2                                       | 0.50                              | 1.22x10 <sup>-3</sup>  |
| 212510_at                         | glycerol-3-phosphate dehydrogenase 1-like                                | 0.50                              | 2.93x10 <sup>-6</sup>  |
| 202222_s_at                       | desmin                                                                   | 0.49                              | 6.62x10 <sup>-5</sup>  |
| 205259_at                         | nuclear receptor subfamily 3, group C, member 2                          | 0.49                              | 1.35x10 <sup>-4</sup>  |
| 212774_at                         | zinc finger protein 238                                                  | 0.49                              | 5.77x10 <sup>-7</sup>  |
| 208135_at                         | HNF1 homeobox B                                                          | 0.49                              | 5.91x10 <sup>-4</sup>  |
| 220221_at                         | vacuolar protein sorting 13D (yeast)                                     | 0.49                              | 1.91x10 <sup>-4</sup>  |
| 212841_s_at                       | PTPRF interacting protein, binding protein 2 (liprin beta 2)             | 0.49                              | 3.47x10 <sup>-5</sup>  |

**Supplemental Gene List III. Transcriptomal Differences between Basal Cell (BC)-high  
Adenocarcinoma (adenoCa) vs BC-low AdenoCa (cont. page 13)**

| Probe ID    | Gene name                                                       | BC-high adenoCa vs BC-low adenoCa |                       |
|-------------|-----------------------------------------------------------------|-----------------------------------|-----------------------|
|             |                                                                 | Fold-change                       | p value               |
| 204039_at   | CCAAT/enhancer binding protein (C/EBP), alpha                   | 0.49                              | 2.83x10 <sup>-5</sup> |
| 215536_at   | major histocompatibility complex, class II, DQ beta 2           | 0.49                              | 7.87x10 <sup>-3</sup> |
| 222150_s_at | pigeon homolog (Drosophila)                                     | 0.49                              | 2.44x10 <sup>-8</sup> |
| 214250_at   | nuclear mitotic apparatus protein 1                             | 0.49                              | 3.50x10 <sup>-3</sup> |
| 204130_at   | hydroxysteroid (11-beta) dehydrogenase 2                        | 0.49                              | 8.33x10 <sup>-3</sup> |
| 204802_at   | Ras-related associated with diabetes                            | 0.49                              | 1.56x10 <sup>-3</sup> |
| 206714_at   | arachidonate 15-lipoxygenase, second type                       | 0.49                              | 2.01x10 <sup>-3</sup> |
| 217422_s_at | CD22 antigen ; myelin associated glycoprotein                   | 0.49                              | 3.30x10 <sup>-3</sup> |
| 219127_at   | proline rich 15-like                                            | 0.49                              | 2.23x10 <sup>-5</sup> |
| 204497_at   | adenylate cyclase 9                                             | 0.48                              | 6.13x10 <sup>-6</sup> |
| 201540_at   | four and a half LIM domains 1                                   | 0.48                              | 1.66x10 <sup>-3</sup> |
| 205316_at   | Solute carrier family 15 (H+/peptide transporter), member 2     | 0.48                              | 2.99x10 <sup>-5</sup> |
| 205619_s_at | mesenchyme homeo box 1                                          | 0.48                              | 9.91x10 <sup>-5</sup> |
| 214657_s_at | Trophoblast-derived noncoding RNA                               | 0.48                              | 4.02x10 <sup>-4</sup> |
| 214035_x_at | nuclear pore complex interacting protein-like 3                 | 0.48                              | 1.94x10 <sup>-7</sup> |
| 219389_at   | sushi domain containing 4                                       | 0.48                              | 4.56x10 <sup>-3</sup> |
| 220168_at   | cancer susceptibility candidate 1                               | 0.48                              | 4.63x10 <sup>-5</sup> |
| 219136_s_at | lipase maturation factor 1                                      | 0.48                              | 7.69x10 <sup>-4</sup> |
| 213212_x_at | golgin A6 family-like 5 (pseudogene)                            | 0.48                              | 4.06x10 <sup>-6</sup> |
| 220677_s_at | ADAM metallopeptidase with thrombospondin type 1 motif, 8       | 0.48                              | 3.63x10 <sup>-3</sup> |
| 214964_at   | KIAA1856 protein                                                | 0.48                              | 1.86x10 <sup>-4</sup> |
| 209840_s_at | leucine rich repeat neuronal 3                                  | 0.48                              | 4.87x10 <sup>-4</sup> |
| 205102_at   | transmembrane protease, serine 2                                | 0.48                              | 7.63x10 <sup>-5</sup> |
| 220512_at   | deleted in liver cancer 1                                       | 0.48                              | 5.63x10 <sup>-4</sup> |
| 206290_s_at | regulator of G-protein signalling 7                             | 0.48                              | 6.20x10 <sup>-3</sup> |
| 208206_s_at | RAS guanyl releasing protein 2 (calcium and DAG-regulated)      | 0.48                              | 7.07x10 <sup>-4</sup> |
| 219095_at   | phospholipase A2, group IVB (cytosolic)                         | 0.48                              | 1.16x10 <sup>-5</sup> |
| 220369_at   | KIAA2010                                                        | 0.48                              | 9.82x10 <sup>-4</sup> |
| 213364_s_at | sorting nexin 1                                                 | 0.48                              | 1.20x10 <sup>-5</sup> |
| 215784_at   | CD1E antigen, e polypeptide                                     | 0.48                              | 7.58x10 <sup>-3</sup> |
| 204081_at   | neurogranin (protein kinase C substrate, RC3)                   | 0.47                              | 5.48x10 <sup>-4</sup> |
| 205906_at   | forkhead box J1                                                 | 0.47                              | 1.99x10 <sup>-4</sup> |
| 221602_s_at | Fas apoptotic inhibitory molecule 3                             | 0.47                              | 3.68x10 <sup>-3</sup> |
| 213121_at   | small nuclear ribonucleoprotein 70kDa polypeptide (RNP antigen) | 0.47                              | 4.85x10 <sup>-5</sup> |

**Supplemental Gene List III. Transcriptomal Differences between Basal Cell (BC)-high  
Adenocarcinoma (adenoCa) vs BC-low AdenoCa (cont. page 14)**

| Probe ID    | Gene name                                                                                        | BC-high adenoCa vs BC-low adenoCa |                       |
|-------------|--------------------------------------------------------------------------------------------------|-----------------------------------|-----------------------|
|             |                                                                                                  | Fold-change                       | p value               |
| 214249_at   | tripartite motif-containing 2                                                                    | 0.47                              | 3.58x10 <sup>-3</sup> |
| 215339_at   | natural killer-tumor recognition sequence                                                        | 0.47                              | 5.04x10 <sup>-3</sup> |
| 215578_at   | Gephyrin                                                                                         | 0.47                              | 4.42x10 <sup>-5</sup> |
| 221828_s_at | chromosome 9 open reading frame 28                                                               | 0.47                              | 7.68x10 <sup>-4</sup> |
| 222071_s_at | solute carrier organic anion transporter family, member 4C1                                      | 0.47                              | 1.16x10 <sup>-3</sup> |
| 205531_s_at | glutaminase 2 (liver, mitochondrial)                                                             | 0.47                              | 2.67x10 <sup>-3</sup> |
| 210258_at   | regulator of G-protein signalling 13                                                             | 0.47                              | 2.64x10 <sup>-4</sup> |
| 210528_at   | major histocompatibility complex, class I-related                                                | 0.47                              | 7.82x10 <sup>-5</sup> |
| 219197_s_at | signal peptide, CUB domain, EGF-like 2                                                           | 0.47                              | 2.93x10 <sup>-4</sup> |
| 221427_s_at | cyclin L2                                                                                        | 0.47                              | 8.87x10 <sup>-4</sup> |
| 210944_s_at | calpain 3, (p94)                                                                                 | 0.47                              | 6.18x10 <sup>-8</sup> |
| 39249_at    | aquaporin 3                                                                                      | 0.47                              | 7.01x10 <sup>-3</sup> |
| 207073_at   | cyclin-dependent kinase-like 2 (CDC2-related kinase)                                             | 0.47                              | 1.34x10 <sup>-3</sup> |
| 220150_s_at | chromosome 6 open reading frame 60                                                               | 0.47                              | 5.30x10 <sup>-8</sup> |
| 205101_at   | class II, major histocompatibility complex, transactivator                                       | 0.47                              | 3.60x10 <sup>-6</sup> |
| 212599_at   | autism susceptibility candidate 2                                                                | 0.47                              | 3.34x10 <sup>-4</sup> |
| 215474_at   | Chromosome 8 open reading frame 36                                                               | 0.47                              | 2.29x10 <sup>-3</sup> |
| 205343_at   | sulfotransferase family, cytosolic, 1C, member 1                                                 | 0.47                              | 1.94x10 <sup>-4</sup> |
| 210328_at   | glycine N-methyltransferase                                                                      | 0.46                              | 5.24x10 <sup>-4</sup> |
| 217929_s_at | KIAA0319-like                                                                                    | 0.46                              | 5.38x10 <sup>-3</sup> |
| 220220_at   | leucine rich repeat containing 37, member A4 (pseudogene)                                        | 0.46                              | 8.42x10 <sup>-5</sup> |
| 220296_at   | UDP-N-acetyl-alpha-D-galactosamine:polypeptide N-acetylgalactosaminyltransferase 10 (GalNAc-T10) | 0.46                              | 5.63x10 <sup>-5</sup> |
| 205464_at   | sodium channel, nonvoltage-gated 1, beta (Liddle syndrome)                                       | 0.46                              | 9.32x10 <sup>-5</sup> |
| 205978_at   | klotho                                                                                           | 0.46                              | 6.61x10 <sup>-5</sup> |
| 207896_s_at | deleted in lung and esophageal cancer 1                                                          | 0.46                              | 4.44x10 <sup>-4</sup> |
| 215800_at   | dual oxidase 1                                                                                   | 0.46                              | 2.48x10 <sup>-7</sup> |
| 204201_s_at | protein tyrosine phosphatase, non-receptor type 13 (APO-1/CD95 (Fas)-associated phosphatase)     | 0.46                              | 3.62x10 <sup>-5</sup> |
| 220187_at   | STEAP family member 4                                                                            | 0.46                              | 2.45x10 <sup>-3</sup> |
| 215785_s_at | cytoplasmic FMR1 interacting protein 2                                                           | 0.46                              | 1.77x10 <sup>-5</sup> |
| 215807_s_at | plexin B1                                                                                        | 0.45                              | 3.02x10 <sup>-3</sup> |
| 206007_at   | proteoglycan 4                                                                                   | 0.45                              | 1.10x10 <sup>-3</sup> |
| 215783_s_at | alkaline phosphatase, liver/bone/kidney                                                          | 0.45                              | 5.96x10 <sup>-4</sup> |
| 221874_at   | KIAA1324                                                                                         | 0.45                              | 1.31x10 <sup>-3</sup> |

**Supplemental Gene List III. Transcriptomal Differences between Basal Cell (BC)-high  
Adenocarcinoma (adenoCa) vs BC-low AdenoCa (cont. page 15)**

| Probe ID    | Gene name                                                                              | BC-high adenoCa vs BC-low adenoCa |                       |
|-------------|----------------------------------------------------------------------------------------|-----------------------------------|-----------------------|
|             |                                                                                        | Fold-change                       | p value               |
| 215147_at   | CUG triplet repeat, RNA binding protein 2                                              | 0.45                              | 5.43x10 <sup>-4</sup> |
| 206330_s_at | SHC (Src homology 2 domain containing) transforming protein 3                          | 0.45                              | 1.32x10 <sup>-4</sup> |
| 205414_s_at | KIAA0672 gene product                                                                  | 0.45                              | 2.59x10 <sup>-4</sup> |
| 220456_at   | chromosome 20 open reading frame 38                                                    | 0.45                              | 4.25x10 <sup>-4</sup> |
| 215782_at   | Ras-like GTPase-like                                                                   | 0.45                              | 3.82x10 <sup>-5</sup> |
| 208451_s_at | complement component 4A ; complement component 4B ; complement component 4B, telomeric | 0.44                              | 3.55x10 <sup>-5</sup> |
| 210239_at   | iroquois homeobox protein 5                                                            | 0.44                              | 6.24x10 <sup>-3</sup> |
| 220704_at   | zinc finger protein, subfamily 1A, 1 (Ikaros)                                          | 0.44                              | 3.35x10 <sup>-4</sup> |
| 214479_at   | GDNF family receptor alpha 3                                                           | 0.44                              | 8.89x10 <sup>-3</sup> |
| 221577_x_at | growth differentiation factor 15                                                       | 0.44                              | 4.81x10 <sup>-4</sup> |
| 207355_at   | solute carrier family 1 (glutamate transporter), member 7                              | 0.44                              | 4.76x10 <sup>-3</sup> |
| 204719_at   | ATP-binding cassette, sub-family A (ABC1), member 8                                    | 0.44                              | 9.32x10 <sup>-4</sup> |
| 210323_at   | tektin 2 (testicular)                                                                  | 0.44                              | 4.40x10 <sup>-5</sup> |
| 210084_x_at | tryptase alpha/beta 1                                                                  | 0.44                              | 6.43x10 <sup>-3</sup> |
| 203892_at   | WAP four-disulfide core domain 2                                                       | 0.44                              | 1.87x10 <sup>-3</sup> |
| 205839_s_at | benzodiazapine receptor (peripheral) associated protein 1                              | 0.43                              | 1.88x10 <sup>-8</sup> |
| 215575_at   | phosphodiesterase 4D interacting protein (myomegalin)                                  | 0.43                              | 3.73x10 <sup>-4</sup> |
| 220061_at   | acyl-CoA synthetase medium-chain family member 5                                       | 0.43                              | 5.08x10 <sup>-5</sup> |
| 209368_at   | epoxide hydrolase 2, cytoplasmic                                                       | 0.43                              | 5.18x10 <sup>-4</sup> |
| 213106_at   | ATPase, aminophospholipid transporter (APLT), Class I, type 8A, member 1               | 0.43                              | 2.46x10 <sup>-6</sup> |
| 204124_at   | solute carrier family 34 (sodium phosphate), member 2                                  | 0.43                              | 1.27x10 <sup>-3</sup> |
| 219230_at   | transmembrane protein 100                                                              | 0.43                              | 6.47x10 <sup>-4</sup> |
| 206019_at   | RNA binding motif protein 19                                                           | 0.43                              | 8.43x10 <sup>-4</sup> |
| 218087_s_at | sorbin and SH3 domain containing 1                                                     | 0.42                              | 7.51x10 <sup>-4</sup> |
| 220055_at   | zinc finger protein 287                                                                | 0.42                              | 2.42x10 <sup>-4</sup> |
| 214602_at   | collagen, type IV, alpha 4                                                             | 0.42                              | 3.32x10 <sup>-3</sup> |
| 219857_at   | chromosome 10 open reading frame 81                                                    | 0.42                              | 5.92x10 <sup>-3</sup> |
| 214188_at   | Hexamethylene bis-acetamide inducible 1                                                | 0.42                              | 2.52x10 <sup>-4</sup> |
| 221272_s_at | chromosome 1 open reading frame 21                                                     | 0.42                              | 4.26x10 <sup>-5</sup> |
| 222073_at   | collagen, type IV, alpha 3 (Goodpasture antigen)                                       | 0.42                              | 1.40x10 <sup>-5</sup> |
| 206255_at   | B lymphoid tyrosine kinase                                                             | 0.42                              | 1.91x10 <sup>-3</sup> |
| 212448_at   | neural precursor cell expressed, developmentally down-regulated 4-like                 | 0.42                              | 6.51x10 <sup>-6</sup> |
| 205500_at   | complement component 5                                                                 | 0.42                              | 5.83x10 <sup>-4</sup> |
| 205776_at   | flavin containing monooxygenase 5                                                      | 0.42                              | 3.98x10 <sup>-4</sup> |

**Supplemental Gene List III. Transcriptomal Differences between Basal Cell (BC)-high  
Adenocarcinoma (adenoCa) vs BC-low AdenoCa (cont. page 16)**

| Probe ID    | Gene name                                                                                                    | BC-high adenoCa vs BC-low adenoCa |                       |
|-------------|--------------------------------------------------------------------------------------------------------------|-----------------------------------|-----------------------|
|             |                                                                                                              | Fold-change                       | p value               |
| 207837_at   | RNA binding protein with multiple splicing                                                                   | 0.41                              | 2.66x10 <sup>-5</sup> |
| 205569_at   | lysosomal-associated membrane protein 3                                                                      | 0.41                              | 4.24x10 <sup>-4</sup> |
| 208434_at   | myelodysplasia syndrome 1                                                                                    | 0.41                              | 3.71x10 <sup>-4</sup> |
| 213802_at   | Protease, serine, 12 (neurotrypsin, motopsin)                                                                | 0.41                              | 2.91x10 <sup>-3</sup> |
| 203911_at   | RAP1, GTPase activating protein 1                                                                            | 0.41                              | 6.49x10 <sup>-6</sup> |
| 204428_s_at | lecithin-cholesterol acyltransferase                                                                         | 0.41                              | 8.18x10 <sup>-4</sup> |
| 209793_at   | glutamate receptor, ionotropic, AMPA 1                                                                       | 0.41                              | 2.85x10 <sup>-5</sup> |
| 204865_at   | carbonic anhydrase III, muscle specific                                                                      | 0.41                              | 2.76x10 <sup>-5</sup> |
| 205200_at   | C-type lectin domain family 3, member B                                                                      | 0.41                              | 3.50x10 <sup>-4</sup> |
| 205883_at   | zinc finger and BTB domain containing 16                                                                     | 0.41                              | 1.15x10 <sup>-5</sup> |
| 216134_at   | FERM domain containing 4B                                                                                    | 0.41                              | 3.37x10 <sup>-5</sup> |
| 215921_at   | polycystic kidney disease 1 (autosomal dominant)<br>pseudogene 1                                             | 0.41                              | 2.16x10 <sup>-4</sup> |
| 214890_s_at | DKFZP564J102 protein                                                                                         | 0.40                              | 1.53x10 <sup>-3</sup> |
| 220858_at   | sorbin and SH3 domain containing 2                                                                           | 0.40                              | 8.72x10 <sup>-5</sup> |
| 220889_s_at | carbonic anhydrase X                                                                                         | 0.40                              | 3.47x10 <sup>-3</sup> |
| 40284_at    | forkhead box A2                                                                                              | 0.40                              | 3.11x10 <sup>-3</sup> |
| 209763_at   | chordin-like 1                                                                                               | 0.40                              | 1.04x10 <sup>-5</sup> |
| 210113_s_at | NACHT, leucine rich repeat and PYD (pyrin domain)<br>containing 1                                            | 0.40                              | 6.28x10 <sup>-5</sup> |
| 210571_s_at | cytidine monophosphate-N-acetylneuraminic acid<br>hydroxylase (CMP-N-acetylneuraminic acid<br>monooxygenase) | 0.40                              | 1.16x10 <sup>-5</sup> |
| 207569_at   | v-ros UR2 sarcoma virus oncogene homolog 1 (avian)                                                           | 0.40                              | 8.83x10 <sup>-6</sup> |
| 220624_s_at | E74-like factor 5 (ets domain transcription factor)                                                          | 0.40                              | 7.35x10 <sup>-3</sup> |
| 203548_s_at | lipoprotein lipase                                                                                           | 0.40                              | 5.67x10 <sup>-3</sup> |
| 215355_at   | POU domain, class 2, transcription factor 3                                                                  | 0.39                              | 2.79x10 <sup>-3</sup> |
| 219525_at   | solute carrier family 47, member 1                                                                           | 0.39                              | 7.03x10 <sup>-3</sup> |
| 206010_at   | hyaluronan binding protein 2                                                                                 | 0.39                              | 5.74x10 <sup>-5</sup> |
| 206069_s_at | acyl-Coenzyme A dehydrogenase, long chain                                                                    | 0.39                              | 6.26x10 <sup>-4</sup> |
| 213493_at   | sushi, nidogen and EGF-like domains 1                                                                        | 0.39                              | 1.00x10 <sup>-4</sup> |
| 217418_x_at | membrane-spanning 4-domains, subfamily A, member 1                                                           | 0.39                              | 1.07x10 <sup>-5</sup> |
| 201497_x_at | myosin, heavy polypeptide 11, smooth muscle                                                                  | 0.39                              | 8.38x10 <sup>-3</sup> |
| 215184_at   | death-associated protein kinase 2                                                                            | 0.39                              | 1.55x10 <sup>-6</sup> |
| 205969_at   | arylacetamide deacetylase (esterase)                                                                         | 0.39                              | 6.26x10 <sup>-3</sup> |
| 201785_at   | ribonuclease, RNase A family, 1 (pancreatic)                                                                 | 0.38                              | 3.94x10 <sup>-5</sup> |
| 212695_at   | cryptochrome 2 (photolyase-like)                                                                             | 0.38                              | 1.47x10 <sup>-5</sup> |
| 220630_s_at | chitinase, acidic                                                                                            | 0.38                              | 4.52x10 <sup>-5</sup> |

**Supplemental Gene List III. Transcriptomal Differences between Basal Cell (BC)-high  
Adenocarcinoma (adenoCa) vs BC-low AdenoCa (cont. page 17)**

| Probe ID    | Gene name                                                                                                                                                                                    | BC-high adenoCa vs BC-low adenoCa |                       |
|-------------|----------------------------------------------------------------------------------------------------------------------------------------------------------------------------------------------|-----------------------------------|-----------------------|
|             |                                                                                                                                                                                              | Fold-change                       | p value               |
| 208791_at   | clusterin (complement lysis inhibitor, SP-40,40, sulfated glycoprotein 2, testosterone-repressed prostate message 2, apolipoprotein J)                                                       | 0.38                              | 1.56x10 <sup>-3</sup> |
| 216468_s_at | zinc finger protein 682                                                                                                                                                                      | 0.38                              | 1.78x10 <sup>-4</sup> |
| 201525_at   | apolipoprotein D                                                                                                                                                                             | 0.38                              | 2.09x10 <sup>-4</sup> |
| 203638_s_at | fibroblast growth factor receptor 2 (bacteria-expressed kinase, keratinocyte growth factor receptor, craniofacial dysostosis 1, Crouzon syndrome, Pfeiffer syndrome, Jackson-Weiss syndrome) | 0.38                              | 1.03x10 <sup>-3</sup> |
| 202295_s_at | cathepsin H                                                                                                                                                                                  | 0.37                              | 3.27x10 <sup>-8</sup> |
| 208609_s_at | tenascin XA pseudogene ; tenascin XB                                                                                                                                                         | 0.37                              | 3.61x10 <sup>-7</sup> |
| 220269_at   | zinc finger, B-box domain containing                                                                                                                                                         | 0.37                              | 1.66x10 <sup>-3</sup> |
| 215563_s_at | macrophage stimulating, pseudogene 9                                                                                                                                                         | 0.37                              | 5.89x10 <sup>-6</sup> |
| 220156_at   | EF-hand calcium binding domain 1                                                                                                                                                             | 0.37                              | 2.05x10 <sup>-4</sup> |
| 202992_at   | complement component 7                                                                                                                                                                       | 0.37                              | 2.48x10 <sup>-3</sup> |
| 203924_at   | glutathione S-transferase A1                                                                                                                                                                 | 0.36                              | 3.27x10 <sup>-3</sup> |
| 214774_x_at | trinucleotide repeat containing 9                                                                                                                                                            | 0.36                              | 2.30x10 <sup>-3</sup> |
| 204487_s_at | potassium voltage-gated channel, KQT-like subfamily, member 1                                                                                                                                | 0.36                              | 2.36x10 <sup>-3</sup> |
| 214203_s_at | proline dehydrogenase (oxidase) 1                                                                                                                                                            | 0.36                              | 3.84x10 <sup>-4</sup> |
| 37004_at    | surfactant, pulmonary-associated protein B                                                                                                                                                   | 0.36                              | 2.08x10 <sup>-3</sup> |
| 220622_at   | leucine rich repeat containing 31                                                                                                                                                            | 0.36                              | 2.35x10 <sup>-3</sup> |
| 205591_at   | olfactomedin 1                                                                                                                                                                               | 0.35                              | 1.82x10 <sup>-3</sup> |
| 209460_at   | 4-aminobutyrate aminotransferase                                                                                                                                                             | 0.35                              | 1.14x10 <sup>-7</sup> |
| 215350_at   | spectrin repeat containing, nuclear envelope 1                                                                                                                                               | 0.35                              | 1.24x10 <sup>-5</sup> |
| 208606_s_at | wingless-type MMTV integration site family, member 4                                                                                                                                         | 0.34                              | 1.31x10 <sup>-4</sup> |
| 217133_x_at | cytochrome P450, family 2, subfamily B, polypeptide 6                                                                                                                                        | 0.34                              | 1.26x10 <sup>-6</sup> |
| 213317_at   | Chloride intracellular channel 5                                                                                                                                                             | 0.34                              | 2.41x10 <sup>-4</sup> |
| 216373_at   | transmembrane anterior posterior transformation 1                                                                                                                                            | 0.34                              | 2.53x10 <sup>-5</sup> |
| 210119_at   | potassium inwardly-rectifying channel, subfamily J, member 15                                                                                                                                | 0.34                              | 5.34x10 <sup>-5</sup> |
| 205654_at   | complement component 4 binding protein, alpha                                                                                                                                                | 0.34                              | 1.52x10 <sup>-3</sup> |
| 208250_s_at | deleted in malignant brain tumors 1                                                                                                                                                          | 0.34                              | 2.64x10 <sup>-4</sup> |
| 204437_s_at | folate receptor 1 (adult)                                                                                                                                                                    | 0.34                              | 8.16x10 <sup>-5</sup> |
| 206651_s_at | carboxypeptidase B2 (plasma, carboxypeptidase U)                                                                                                                                             | 0.34                              | 7.41x10 <sup>-4</sup> |
| 211024_s_at | thyroid transcription factor 1 ; thyroid transcription factor 1                                                                                                                              | 0.33                              | 3.30x10 <sup>-4</sup> |
| 204424_s_at | LIM domain only 3 (rhombotin-like 2)                                                                                                                                                         | 0.32                              | 2.09x10 <sup>-5</sup> |

**Supplemental Gene List III. Transcriptomal Differences between Basal Cell (BC)-high  
Adenocarcinoma (adenoCa) vs BC-low AdenoCa (cont. page 18)**

| Probe ID    | Gene name                                                                                                                                                            | BC-high adenoCa vs BC-low adenoCa |                       |
|-------------|----------------------------------------------------------------------------------------------------------------------------------------------------------------------|-----------------------------------|-----------------------|
|             |                                                                                                                                                                      | Fold-change                       | p value               |
| 216000_at   | KIAA0484 protein                                                                                                                                                     | 0.32                              | 2.09x10 <sup>-6</sup> |
| 218922_s_at | LAG1 longevity assurance homolog 4 (S. cerevisiae)                                                                                                                   | 0.32                              | 3.99x10 <sup>-5</sup> |
| 215559_at   | ATP-binding cassette, sub-family C (CFTR/MRP), member 6                                                                                                              | 0.32                              | 1.13x10 <sup>-5</sup> |
| 205216_s_at | apolipoprotein H (beta-2-glycoprotein I)                                                                                                                             | 0.32                              | 4.66x10 <sup>-6</sup> |
| 206742_at   | c-fos induced growth factor (vascular endothelial growth factor D)                                                                                                   | 0.32                              | 3.76x10 <sup>-6</sup> |
| 204343_at   | ATP-binding cassette, sub-family A (ABC1), member 3                                                                                                                  | 0.32                              | 7.82x10 <sup>-5</sup> |
| 218835_at   | surfactant, pulmonary-associated protein A2                                                                                                                          | 0.32                              | 3.10x10 <sup>-3</sup> |
| 209614_at   | alcohol dehydrogenase 1A (class I), alpha polypeptide ; alcohol dehydrogenase IB (class I), beta polypeptide ; alcohol dehydrogenase 1C (class I), gamma polypeptide | 0.32                              | 4.05x10 <sup>-6</sup> |
| 210081_at   | advanced glycosylation end product-specific receptor                                                                                                                 | 0.31                              | 9.00x10 <sup>-5</sup> |
| 212951_at   | G protein-coupled receptor 116                                                                                                                                       | 0.31                              | 5.63x10 <sup>-7</sup> |
| 208335_s_at | Duffy blood group                                                                                                                                                    | 0.31                              | 1.86x10 <sup>-3</sup> |
| 205496_at   | KIAA0408                                                                                                                                                             | 0.31                              | 6.32x10 <sup>-6</sup> |
| 204379_s_at | fibroblast growth factor receptor 3 (achondroplasia, thanatophoric dwarfism)                                                                                         | 0.31                              | 4.39x10 <sup>-4</sup> |
| 205489_at   | crystallin, mu                                                                                                                                                       | 0.31                              | 2.48x10 <sup>-7</sup> |
| 215554_at   | glycosylphosphatidylinositol specific phospholipase D1                                                                                                               | 0.31                              | 2.76x10 <sup>-5</sup> |
| 204213_at   | polymeric immunoglobulin receptor                                                                                                                                    | 0.31                              | 6.39x10 <sup>-7</sup> |
| 213451_x_at | tenascin XB                                                                                                                                                          | 0.30                              | 2.04x10 <sup>-6</sup> |
| 221646_s_at | zinc finger, DHHC-type containing 11                                                                                                                                 | 0.30                              | 7.68x10 <sup>-9</sup> |
| 205544_s_at | complement component (3d/Epstein Barr virus) receptor 2                                                                                                              | 0.30                              | 4.88x10 <sup>-4</sup> |
| 205987_at   | CD1C antigen, c polypeptide                                                                                                                                          | 0.29                              | 1.62x10 <sup>-4</sup> |
| 210121_at   | UDP-Gal:betaGlcNAc beta 1,3-galactosyltransferase, polypeptide 2                                                                                                     | 0.29                              | 3.84x10 <sup>-4</sup> |
| 209904_at   | troponin C type 1 (slow)                                                                                                                                             | 0.29                              | 1.12x10 <sup>-3</sup> |
| 205043_at   | cystic fibrosis transmembrane conductance regulator, ATP-binding cassette (sub-family C, member 7)                                                                   | 0.29                              | 4.57x10 <sup>-4</sup> |
| 214433_s_at | selenium binding protein 1 ; selenium binding protein 1                                                                                                              | 0.28                              | 1.02x10 <sup>-9</sup> |
| 205614_x_at | macrophage stimulating 1 (hepatocyte growth factor-like)                                                                                                             | 0.27                              | 1.91x10 <sup>-8</sup> |
| 204754_at   | Hepatic leukemia factor                                                                                                                                              | 0.27                              | 3.95x10 <sup>-6</sup> |
| 210382_at   | secretin receptor                                                                                                                                                    | 0.26                              | 9.21x10 <sup>-7</sup> |
| 210067_at   | aquaporin 4                                                                                                                                                          | 0.26                              | 3.20x10 <sup>-3</sup> |
| 205576_at   | serpin peptidase inhibitor, clade D (heparin cofactor), member 1                                                                                                     | 0.25                              | 2.85x10 <sup>-4</sup> |
| 220003_at   | leucine rich repeat containing 36                                                                                                                                    | 0.25                              | 2.33x10 <sup>-6</sup> |

**Supplemental Gene List III. Transcriptomal Differences between Basal Cell (BC)-high  
Adenocarcinoma (adenoCa) vs BC-low AdenoCa (cont. page 19)**

| Probe ID    | Gene name                                                                                                                                                     | BC-high adenoCa vs BC-low adenoCa |                        |
|-------------|---------------------------------------------------------------------------------------------------------------------------------------------------------------|-----------------------------------|------------------------|
|             |                                                                                                                                                               | Fold-change                       | p value                |
| 205700_at   | hydroxysteroid (17-beta) dehydrogenase 6                                                                                                                      | 0.25                              | 7.40x10 <sup>-6</sup>  |
| 219476_at   | chromosome 1 open reading frame 116                                                                                                                           | 0.25                              | 4.04x10 <sup>-5</sup>  |
| 206311_s_at | phospholipase A2, group IB (pancreas)                                                                                                                         | 0.24                              | 2.21x10 <sup>-6</sup>  |
| 221132_at   | claudin 18                                                                                                                                                    | 0.24                              | 2.72x10 <sup>-3</sup>  |
| 208498_s_at | amylase, alpha 1A; salivary ; amylase, alpha 1B; salivary ;<br>amylase, alpha 1C; salivary ; amylase, alpha 2A;<br>pancreatic ; amylase, alpha 2B; pancreatic | 0.23                              | 5.94x10 <sup>-7</sup>  |
| 38691_s_at  | surfactant, pulmonary-associated protein C                                                                                                                    | 0.23                              | 9.97x10 <sup>-5</sup>  |
| 205185_at   | serine peptidase inhibitor, Kazal type 5                                                                                                                      | 0.22                              | 4.68x10 <sup>-5</sup>  |
| 205979_at   | secretoglobin, family 2A, member 1                                                                                                                            | 0.22                              | 2.15x10 <sup>-3</sup>  |
| 209613_s_at | alcohol dehydrogenase IB (class I), beta polypeptide                                                                                                          | 0.21                              | 3.81x10 <sup>-5</sup>  |
| 205261_at   | progastricsin (pepsinogen C)                                                                                                                                  | 0.19                              | 1.97x10 <sup>-5</sup>  |
| 205725_at   | secretoglobin, family 1A, member 1 (uteroglobin)                                                                                                              | 0.18                              | 3.28x10 <sup>-4</sup>  |
| 210550_s_at | Ras protein-specific guanine nucleotide-releasing factor 1                                                                                                    | 0.18                              | 1.05x10 <sup>-5</sup>  |
| 210272_at   | cytochrome P450, family 2, subfamily B, polypeptide 7<br>pseudogene 1                                                                                         | 0.18                              | 1.44x10 <sup>-7</sup>  |
| 204811_s_at | calcium channel, voltage-dependent, alpha 2/delta subunit<br>2                                                                                                | 0.17                              | 9.25x10 <sup>-12</sup> |
| 214199_at   | surfactant, pulmonary-associated protein D                                                                                                                    | 0.17                              | 1.25x10 <sup>-5</sup>  |
| 218876_at   | brain specific protein                                                                                                                                        | 0.16                              | 6.58x10 <sup>-7</sup>  |
| 204712_at   | WNT inhibitory factor 1                                                                                                                                       | 0.14                              | 1.37x10 <sup>-5</sup>  |
| 210096_at   | cytochrome P450, family 4, subfamily B, polypeptide 1                                                                                                         | 0.10                              | 2.81x10 <sup>-9</sup>  |



**Supplemental Gene List IV. Transcriptomal Differences between Lung Adenocarcinoma  
(adenoCa) Patients with Poor Survival vs Those with Good Survival**

| Probe ID    | Gene name                                                                                        | OS<2yr vs OS>5yr in<br>adenoCa |                       | Airway<br>BC<br>signature |
|-------------|--------------------------------------------------------------------------------------------------|--------------------------------|-----------------------|---------------------------|
|             |                                                                                                  | Fold-<br>change                | p value               |                           |
| 37892_at    | collagen, type XI, alpha 1                                                                       | 5.62                           | 3.33x10 <sup>-2</sup> |                           |
| 219491_at   | leucine rich repeat and fibronectin type III domain<br>containing 4                              | 3.73                           | 3.59x10 <sup>-2</sup> |                           |
| 218468_s_at | gremlin 1, cysteine knot superfamily, homolog<br>(Xenopus laevis)                                | 3.68                           | 3.69x10 <sup>-2</sup> |                           |
| 205403_at   | interleukin 1 receptor, type II                                                                  | 3.64                           | 7.12x10 <sup>-3</sup> |                           |
| 219918_s_at | asp (abnormal spindle)-like, microcephaly<br>associated (Drosophila)                             | 3.14                           | 4.06x10 <sup>-2</sup> |                           |
| 209825_s_at | uridine-cytidine kinase 2                                                                        | 3.09                           | 2.01x10 <sup>-2</sup> | O                         |
| 209875_s_at | secreted phosphoprotein 1 (osteopontin, bone<br>sialoprotein I, early T-lymphocyte activation 1) | 2.95                           | 1.67x10 <sup>-2</sup> |                           |
| 201890_at   | ribonucleotide reductase M2 polypeptide                                                          | 2.94                           | 4.26x10 <sup>-2</sup> |                           |
| 218542_at   | chromosome 10 open reading frame 3                                                               | 2.94                           | 4.06x10 <sup>-2</sup> |                           |
| 209900_s_at | solute carrier family 16 (monocarboxylic acid<br>transporters), member 1                         | 2.93                           | 3.00x10 <sup>-2</sup> |                           |
| 212396_s_at | KIAA0090                                                                                         | 2.82                           | 3.69x10 <sup>-2</sup> |                           |
| 204641_at   | NIMA (never in mitosis gene a)-related kinase 2                                                  | 2.76                           | 3.09x10 <sup>-2</sup> |                           |
| 212353_at   | sulfatase 1                                                                                      | 2.74                           | 2.29x10 <sup>-2</sup> |                           |
| 213338_at   | Ras-induced senescence 1                                                                         | 2.68                           | 3.15x10 <sup>-2</sup> | O                         |
| 202855_s_at | solute carrier family 16 (monocarboxylic acid<br>transporters), member 3                         | 2.67                           | 2.86x10 <sup>-2</sup> | O                         |
| 205568_at   | aquaporin 9                                                                                      | 2.65                           | 3.80x10 <sup>-2</sup> |                           |
| 205542_at   | six transmembrane epithelial antigen of the prostate<br>1                                        | 2.55                           | 3.15x10 <sup>-2</sup> |                           |
| 217553_at   | similar to Six transmembrane epithelial antigen of<br>prostate                                   | 2.55                           | 2.86x10 <sup>-2</sup> | O                         |
| 202363_at   | sparc/osteonectin, cwcv and kazal-like domains<br>proteoglycan (testican)                        | 2.54                           | 2.90x10 <sup>-2</sup> |                           |
| 203362_s_at | MAD2 mitotic arrest deficient-like 1 (yeast)                                                     | 2.53                           | 4.21x10 <sup>-2</sup> |                           |
| 202580_x_at | forkhead box M1                                                                                  | 2.52                           | 5.93x10 <sup>-3</sup> |                           |
| 201037_at   | phosphofructokinase, platelet                                                                    | 2.51                           | 2.57x10 <sup>-2</sup> |                           |
| 210809_s_at | periostin, osteoblast specific factor                                                            | 2.49                           | 4.88x10 <sup>-2</sup> |                           |
| 213008_at   | hypothetical protein FLJ10719                                                                    | 2.48                           | 2.14x10 <sup>-2</sup> |                           |
| 203213_at   | Cell division cycle 2, G1 to S and G2 to M                                                       | 2.46                           | 4.08x10 <sup>-2</sup> |                           |

**Supplemental Gene List IV. Transcriptomal Differences between Lung Adenocarcinoma (adenoCa) Patients with Poor Survival vs Those with Good Survival (cont. page 2)**

| Probe ID    | Gene name                                                                                                                                   | OS<2yr vs OS>5yr in adenoCa |                       | Airway BC signature |
|-------------|---------------------------------------------------------------------------------------------------------------------------------------------|-----------------------------|-----------------------|---------------------|
|             |                                                                                                                                             | Fold-change                 | p value               |                     |
| 215812_s_at | solute carrier family 6 (neurotransmitter transporter, creatine), member 8 ; similar to sodium- and chloride-dependent creatine transporter | 2.42                        | 4.04x10 <sup>-2</sup> | O                   |
| 212992_at   | chromosome 14 open reading frame 78                                                                                                         | 2.40                        | 2.57x10 <sup>-2</sup> | O                   |
| 204825_at   | maternal embryonic leucine zipper kinase                                                                                                    | 2.38                        | 4.21x10 <sup>-2</sup> |                     |
| 210052_s_at | TPX2, microtubule-associated, homolog (Xenopus laevis)                                                                                      | 2.38                        | 2.39x10 <sup>-2</sup> |                     |
| 218663_at   | chromosome condensation protein G                                                                                                           | 2.36                        | 3.04x10 <sup>-2</sup> |                     |
| 202828_s_at | matrix metalloproteinase 14 (membrane-inserted)                                                                                             | 2.35                        | 3.00x10 <sup>-2</sup> |                     |
| 201291_s_at | topoisomerase (DNA) II alpha 170kDa                                                                                                         | 2.33                        | 2.32x10 <sup>-2</sup> |                     |
| 217901_at   | Desmoglein 2                                                                                                                                | 2.33                        | 3.82x10 <sup>-3</sup> | O                   |
| 202094_at   | baculoviral IAP repeat-containing 5 (survivin)                                                                                              | 2.32                        | 3.15x10 <sup>-2</sup> |                     |
| 218843_at   | fibronectin type III domain containing 4                                                                                                    | 2.31                        | 2.65x10 <sup>-2</sup> |                     |
| 201506_at   | transforming growth factor, beta-induced, 68kDa                                                                                             | 2.27                        | 1.51x10 <sup>-2</sup> | O                   |
| 202949_s_at | four and a half LIM domains 2                                                                                                               | 2.24                        | 4.22x10 <sup>-2</sup> | O                   |
| 204750_s_at | desmocollin 2                                                                                                                               | 2.23                        | 2.90x10 <sup>-2</sup> | O                   |
| 205393_s_at | CHK1 checkpoint homolog (S. pombe)                                                                                                          | 2.22                        | 4.06x10 <sup>-2</sup> | O                   |
| 210132_at   | ephrin-A3                                                                                                                                   | 2.22                        | 2.14x10 <sup>-2</sup> |                     |
| 206026_s_at | tumor necrosis factor, alpha-induced protein 6                                                                                              | 2.21                        | 2.29x10 <sup>-2</sup> |                     |
| 218726_at   | hypothetical protein DKFZp762E1312                                                                                                          | 2.21                        | 4.26x10 <sup>-2</sup> |                     |
| 218355_at   | kinesin family member 4A                                                                                                                    | 2.19                        | 3.15x10 <sup>-2</sup> |                     |
| 203806_s_at | Fanconi anemia, complementation group A ;<br>Fanconi anemia, complementation group A                                                        | 2.17                        | 3.15x10 <sup>-2</sup> |                     |
| 218644_at   | pleckstrin 2                                                                                                                                | 2.17                        | 2.29x10 <sup>-2</sup> | O                   |
| 204444_at   | kinesin family member 11                                                                                                                    | 2.16                        | 3.15x10 <sup>-2</sup> |                     |
| 204620_s_at | chondroitin sulfate proteoglycan 2 (versican)                                                                                               | 2.16                        | 3.98x10 <sup>-2</sup> |                     |
| 215723_s_at | phospholipase D1, phosphatidylcholine-specific                                                                                              | 2.15                        | 3.80x10 <sup>-2</sup> |                     |
| 204146_at   | RAD51 associated protein 1                                                                                                                  | 2.14                        | 3.15x10 <sup>-2</sup> |                     |
| 218585_s_at | denticleless homolog (Drosophila)                                                                                                           | 2.14                        | 4.02x10 <sup>-2</sup> |                     |
| 202998_s_at | lysyl oxidase-like 2                                                                                                                        | 2.11                        | 2.14x10 <sup>-2</sup> | O                   |
| 203418_at   | cyclin A2                                                                                                                                   | 2.08                        | 4.49x10 <sup>-2</sup> |                     |
| 212242_at   | tubulin, alpha 1 (testis specific)                                                                                                          | 2.08                        | 2.29x10 <sup>-2</sup> | O                   |
| 220658_s_at | aryl hydrocarbon receptor nuclear translocator-like<br>2                                                                                    | 2.08                        | 4.21x10 <sup>-2</sup> | O                   |

**Supplemental Gene List IV. Transcriptomal Differences between Lung Adenocarcinoma (adenoCa) Patients with Poor Survival vs Those with Good Survival (cont. page 3)**

| Probe ID    | Gene name                                                                                 | OS<2yr vs OS>5yr in adenoCa |                       | Airway BC signature |
|-------------|-------------------------------------------------------------------------------------------|-----------------------------|-----------------------|---------------------|
|             |                                                                                           | Fold-change                 | p value               |                     |
| 213943_at   | twist homolog 1 (acrocephalosyndactyly 3; Saethre-Chotzen syndrome) ( <i>Drosophila</i> ) | 2.07                        | 2.29x10 <sup>-2</sup> |                     |
| 218009_s_at | protein regulator of cytokinesis 1                                                        | 2.07                        | 2.29x10 <sup>-2</sup> |                     |
| 220002_at   | hypothetical protein FLJ10157                                                             | 2.06                        | 4.08x10 <sup>-2</sup> |                     |
| 214702_at   | fibronectin 1                                                                             | 2.02                        | 2.94x10 <sup>-2</sup> | O                   |
| 215076_s_at | collagen, type III, alpha 1 (Ehlers-Danlos syndrome type IV, autosomal dominant)          | 2.02                        | 4.02x10 <sup>-2</sup> |                     |
| 205066_s_at | ectonucleotide pyrophosphatase/phosphodiesterase 1                                        | 2.00                        | 2.29x10 <sup>-2</sup> |                     |
| 209955_s_at | fibroblast activation protein, alpha                                                      | 2.00                        | 4.10x10 <sup>-2</sup> |                     |
| 210074_at   | cathepsin L2                                                                              | 2.00                        | 3.15x10 <sup>-2</sup> | O                   |
| 219978_s_at | nucleolar and spindle associated protein 1                                                | 2.00                        | 4.72x10 <sup>-2</sup> |                     |
| 204237_at   | GULP, engulfment adaptor PTB domain containing 1                                          | 1.98                        | 3.51x10 <sup>-2</sup> |                     |
| 204962_s_at | centromere protein A, 17kDa                                                               | 1.98                        | 4.94x10 <sup>-2</sup> |                     |
| 219888_at   | sperm associated antigen 4                                                                | 1.97                        | 3.15x10 <sup>-2</sup> |                     |
| 210845_s_at | plasminogen activator, urokinase receptor                                                 | 1.96                        | 3.15x10 <sup>-2</sup> |                     |
| 222077_s_at | Rac GTPase activating protein 1                                                           | 1.93                        | 2.57x10 <sup>-2</sup> |                     |
| 217744_s_at | PERP, TP53 apoptosis effector                                                             | 1.93                        | 2.14x10 <sup>-2</sup> |                     |
| 219032_x_at | opsin 3 (encephalopsin, panopsin)                                                         | 1.93                        | 3.33x10 <sup>-2</sup> | O                   |
| 206364_at   | kinesin family member 14                                                                  | 1.92                        | 2.14x10 <sup>-2</sup> |                     |
| 204531_s_at | breast cancer 1, early onset                                                              | 1.92                        | 4.88x10 <sup>-2</sup> |                     |
| 204342_at   | solute carrier family 25 (mitochondrial carrier; phosphate carrier), member 24            | 1.90                        | 3.00x10 <sup>-2</sup> |                     |
| 205122_at   | transmembrane protein with EGF-like and two follistatin-like domains 1                    | 1.89                        | 3.15x10 <sup>-2</sup> | O                   |
| 208079_s_at | serine/threonine kinase 6                                                                 | 1.88                        | 3.15x10 <sup>-2</sup> |                     |
| 202887_s_at | DNA-damage-inducible transcript 4                                                         | 1.86                        | 4.08x10 <sup>-2</sup> |                     |
| 205574_x_at | bone morphogenetic protein 1                                                              | 1.81                        | 4.26x10 <sup>-2</sup> |                     |
| 201669_s_at | myristoylated alanine-rich protein kinase C substrate                                     | 1.81                        | 4.29x10 <sup>-2</sup> |                     |
| 213125_at   | olfactomedin-like 2B                                                                      | 1.81                        | 4.92x10 <sup>-2</sup> |                     |
| 219366_at   | apoptosis, caspase activation inhibitor                                                   | 1.80                        | 3.15x10 <sup>-2</sup> | O                   |
| 204298_s_at | lysyl oxidase                                                                             | 1.79                        | 2.39x10 <sup>-2</sup> |                     |
| 45633_at    | hypothetical protein FLJ13912                                                             | 1.79                        | 3.00x10 <sup>-2</sup> |                     |
| 209642_at   | BUB1 budding uninhibited by benzimidazoles 1 homolog (yeast)                              | 1.78                        | 3.00x10 <sup>-2</sup> |                     |

**Supplemental Gene List IV. Transcriptomal Differences between Lung Adenocarcinoma (adenoCa) Patients with Poor Survival vs Those with Good Survival (cont. page 4)**

| Probe ID                  | Gene name                                                                                             | OS<2yr vs OS>5yr in adenoCa |                       | Airway BC signature |
|---------------------------|-------------------------------------------------------------------------------------------------------|-----------------------------|-----------------------|---------------------|
|                           |                                                                                                       | Fold-change                 | p value               |                     |
| 203755_at                 | BUB1 budding uninhibited by benzimidazoles 1 homolog beta (yeast)                                     | 1.78                        | 4.26x10 <sup>-2</sup> |                     |
| 203414_at                 | monocyte to macrophage differentiation-associated                                                     | 1.77                        | 4.02x10 <sup>-2</sup> | O                   |
| 201930_at                 | MCM6 minichromosome maintenance deficient 6 (MIS5 homolog, <i>S. pombe</i> ) ( <i>S. cerevisiae</i> ) | 1.77                        | 2.29x10 <sup>-2</sup> |                     |
| 222118_at                 | uncharacterized bone marrow protein BM039                                                             | 1.77                        | 3.46x10 <sup>-2</sup> |                     |
| 201250_s_at               | solute carrier family 2 (facilitated glucose transporter), member 1                                   | 1.76                        | 3.15x10 <sup>-2</sup> |                     |
| 204244_s_at               | activator of S phase kinase                                                                           | 1.76                        | 2.69x10 <sup>-2</sup> | O                   |
| 201202_at                 | proliferating cell nuclear antigen                                                                    | 1.75                        | 2.01x10 <sup>-2</sup> |                     |
| 203358_s_at               | enhancer of zeste homolog 2 ( <i>Drosophila</i> )                                                     | 1.75                        | 3.15x10 <sup>-2</sup> |                     |
| 200737_at                 | phosphoglycerate kinase 1                                                                             | 1.74                        | 1.67x10 <sup>-2</sup> |                     |
| 202087_s_at               | cathepsin L                                                                                           | 1.73                        | 4.06x10 <sup>-2</sup> |                     |
| 218349_s_at               | Zwisch, kinetochore associated, homolog ( <i>Drosophila</i> )                                         | 1.73                        | 3.96x10 <sup>-2</sup> |                     |
| 221565_s_at               | family with sequence similarity 26, member B                                                          | 1.73                        | 4.06x10 <sup>-2</sup> |                     |
| 219257_s_at               | sphingosine kinase 1                                                                                  | 1.72                        | 2.29x10 <sup>-2</sup> |                     |
| 220893_at                 | uncharacterized gastric protein ZA52P                                                                 | 1.72                        | 2.14x10 <sup>-2</sup> |                     |
| 203145_at                 | sperm associated antigen 5                                                                            | 1.71                        | 3.00x10 <sup>-2</sup> |                     |
| 218854_at                 | squamous cell carcinoma antigen recognized by T cells 2                                               | 1.70                        | 6.25x10 <sup>-3</sup> |                     |
| 219306_at                 | kinesin family member 15                                                                              | 1.69                        | 4.02x10 <sup>-2</sup> |                     |
| 215084_s_at               | leucine rich repeat containing 42                                                                     | 1.69                        | 2.39x10 <sup>-2</sup> | O                   |
| 218193_s_at               | golgi transport 1 homolog B ( <i>S. cerevisiae</i> )                                                  | 1.68                        | 2.39x10 <sup>-2</sup> | O                   |
| 205024_s_at               | RAD51 homolog (RecA homolog, <i>E. coli</i> ) ( <i>S. cerevisiae</i> )                                | 1.67                        | 3.15x10 <sup>-2</sup> |                     |
| AFFX-HUMGAPDH/M33197_5_at | glyceraldehyde-3-phosphate dehydrogenase                                                              | 1.65                        | 4.80x10 <sup>-2</sup> |                     |
| 214266_s_at               | PDZ and LIM domain 7 (enigma)                                                                         | 1.65                        | 3.04x10 <sup>-2</sup> |                     |
| 203594_at                 | RNA terminal phosphate cyclase domain 1                                                               | 1.64                        | 4.50x10 <sup>-2</sup> |                     |
| 220926_s_at               | chromosome 1 open reading frame 22                                                                    | 1.64                        | 1.51x10 <sup>-2</sup> |                     |
| 202338_at                 | thymidine kinase 1, soluble                                                                           | 1.64                        | 2.39x10 <sup>-2</sup> |                     |
| 203137_at                 | Wilms tumor 1 associated protein                                                                      | 1.64                        | 4.49x10 <sup>-2</sup> |                     |
| 213004_at                 | angiopoietin-like 2                                                                                   | 1.64                        | 4.02x10 <sup>-2</sup> |                     |
| 200897_s_at               | palladin                                                                                              | 1.60                        | 4.92x10 <sup>-2</sup> |                     |
| 201136_at                 | proteolipid protein 2 (colonic epithelium-enriched)                                                   | 1.60                        | 3.57x10 <sup>-2</sup> |                     |

**Supplemental Gene List IV. Transcriptomal Differences between Lung Adenocarcinoma (adenoCa) Patients with Poor Survival vs Those with Good Survival (cont. page 5)**

| Probe ID    | Gene name                                                                                    | OS<2yr vs OS>5yr in adenoCa |                       | Airway BC signature |
|-------------|----------------------------------------------------------------------------------------------|-----------------------------|-----------------------|---------------------|
|             |                                                                                              | Fold-change                 | p value               |                     |
| 200756_x_at | calumenin                                                                                    | 1.59                        | 2.65x10 <sup>-2</sup> |                     |
| 200776_s_at | basic leucine zipper and W2 domains 1 ; similar to basic leucine zipper and W2 domains 1     | 1.58                        | 3.15x10 <sup>-2</sup> |                     |
| 209709_s_at | hyaluronan-mediated motility receptor (RHAMM)                                                | 1.58                        | 4.08x10 <sup>-2</sup> |                     |
| 206796_at   | WNT1 inducible signaling pathway protein 1                                                   | 1.58                        | 3.15x10 <sup>-2</sup> |                     |
| 219874_at   | solute carrier family 12 (potassium/chloride transporters), member 8                         | 1.58                        | 2.14x10 <sup>-2</sup> |                     |
| 41037_at    | TEA domain family member 4                                                                   | 1.57                        | 4.43x10 <sup>-2</sup> | O                   |
| 208854_s_at | serine/threonine kinase 24 (STE20 homolog, yeast)                                            | 1.54                        | 2.46x10 <sup>-2</sup> |                     |
| 209091_s_at | SH3-domain GRB2-like endophilin B1                                                           | 1.53                        | 3.15x10 <sup>-2</sup> |                     |
| 208636_at   | Actinin, alpha 1                                                                             | 1.52                        | 3.15x10 <sup>-2</sup> | O                   |
| 202536_at   | chromatin modifying protein 2B                                                               | 1.52                        | 4.02x10 <sup>-2</sup> |                     |
| 201238_s_at | capping protein (actin filament) muscle Z-line, alpha 2                                      | 1.50                        | 3.70x10 <sup>-2</sup> |                     |
| 201486_at   | reticulocalbin 2, EF-hand calcium binding domain                                             | 1.49                        | 1.51x10 <sup>-2</sup> |                     |
| 208810_at   | DnaJ (Hsp40) homolog, subfamily B, member 6                                                  | 1.49                        | 2.39x10 <sup>-2</sup> |                     |
| 210639_s_at | ATG5 autophagy related 5 homolog (S. cerevisiae)                                             | 1.48                        | 2.39x10 <sup>-2</sup> |                     |
| 212021_s_at | antigen identified by monoclonal antibody Ki-67                                              | 1.45                        | 4.26x10 <sup>-2</sup> |                     |
| 221891_x_at | heat shock 70kDa protein 8                                                                   | 1.45                        | 2.32x10 <sup>-2</sup> |                     |
| 202897_at   | protein tyrosine phosphatase, non-receptor type substrate 1                                  | 1.44                        | 2.24x10 <sup>-2</sup> |                     |
| 201461_s_at | mitogen-activated protein kinase-activated protein kinase 2                                  | 1.43                        | 3.62x10 <sup>-2</sup> |                     |
| 211945_s_at | integrin, beta 1 (fibronectin receptor, beta polypeptide, antigen CD29 includes MDF2, MSK12) | 1.40                        | 4.59x10 <sup>-2</sup> | O                   |
| 201020_at   | tyrosine 3-monooxygenase/tryptophan 5-monooxygenase activation protein, eta polypeptide      | 1.38                        | 1.48x10 <sup>-2</sup> |                     |
| 205202_at   | protein-L-isoaspartate (D-aspartate) O-methyltransferase                                     | 1.37                        | 2.29x10 <sup>-2</sup> |                     |
| 200059_s_at | ras homolog gene family, member A ; ras homolog gene family, member A                        | 1.37                        | 3.21x10 <sup>-2</sup> |                     |
| 202142_at   | COP9 constitutive photomorphogenic homolog subunit 8 (Arabidopsis)                           | 1.34                        | 4.88x10 <sup>-2</sup> |                     |
| 214629_x_at | reticulon 4                                                                                  | 1.33                        | 4.22x10 <sup>-2</sup> |                     |
| 218803_at   | checkpoint with forkhead and ring finger domains                                             | 1.30                        | 3.46x10 <sup>-2</sup> |                     |
| 219540_at   | zinc finger protein 267                                                                      | 1.30                        | 5.17x10 <sup>-3</sup> |                     |

**Supplemental Gene List IV. Transcriptomal Differences between Lung Adenocarcinoma  
(adenoCa) Patients with Poor Survival vs Those with Good Survival (cont. page 6)**

| <b>Probe ID</b> | <b>Gene name</b>                                                                           | <b>OS&lt;2yr vs OS&gt;5yr in<br/>adenoCa</b> |                       | <b>Airway<br/>BC<br/>signature</b> |
|-----------------|--------------------------------------------------------------------------------------------|----------------------------------------------|-----------------------|------------------------------------|
|                 |                                                                                            | <b>Fold-<br/>change</b>                      | <b>p value</b>        |                                    |
| 201179_s_at     | guanine nucleotide binding protein (G protein),<br>alpha inhibiting activity polypeptide 3 | 1.28                                         | 3.15x10 <sup>-2</sup> |                                    |
| 202529_at       | phosphoribosyl pyrophosphate synthetase-<br>associated protein 1                           | 1.27                                         | 3.33x10 <sup>-2</sup> |                                    |

**Supplemental Gene List V. Differences in Airway BC-signature Gene Expression between  
BC-high Adenocarcinoma (adenoCa) vs Squamous Cell Carcinoma**

| Probe ID    | Gene name                                                                  | BC-high adenoCa vs SqCa |                       |
|-------------|----------------------------------------------------------------------------|-------------------------|-----------------------|
|             |                                                                            | Fold-change             | p value               |
| 209278_s_at | tissue factor pathway inhibitor 2                                          | 6.29                    | 1.92x10 <sup>-3</sup> |
| 209016_s_at | keratin 7                                                                  | 6.19                    | 1.26x10 <sup>-4</sup> |
| 203108_at   | G protein-coupled receptor, family C, group 5, member A                    | 3.61                    | 4.25x10 <sup>-4</sup> |
| 205239_at   | amphiregulin (schwannoma-derived growth factor)                            | 3.52                    | 1.25x10 <sup>-3</sup> |
| 222108_at   | adhesion molecule with Ig-like domain 2                                    | 3.52                    | 4.23x10 <sup>-5</sup> |
| 208161_s_at | ATP-binding cassette, sub-family C (CFTR/MRP), member 3                    | 3.26                    | 3.46x10 <sup>-5</sup> |
| 219032_x_at | opsin 3 (encephalopsin, panopsin)                                          | 2.93                    | 7.61x10 <sup>-4</sup> |
| 203939_at   | 5'-nucleotidase, ecto (CD73)                                               | 2.92                    | 1.25x10 <sup>-3</sup> |
| 209803_s_at | pleckstrin homology-like domain, family A, member 2                        | 2.89                    | 2.13x10 <sup>-5</sup> |
| 219045_at   | ras homolog gene family, member F (in filopodia)                           | 2.59                    | 7.15x10 <sup>-5</sup> |
| 209135_at   | aspartate beta-hydroxylase                                                 | 2.56                    | 8.17x10 <sup>-4</sup> |
| 212298_at   | neuropilin 1                                                               | 2.56                    | 2.96x10 <sup>-4</sup> |
| 205767_at   | epiregulin                                                                 | 2.37                    | 9.77x10 <sup>-3</sup> |
| 208892_s_at | dual specificity phosphatase 6                                             | 2.33                    | 7.92x10 <sup>-4</sup> |
| 205174_s_at | homeodomain-only protein                                                   | 2.32                    | 2.05x10 <sup>-2</sup> |
| 211597_s_at | glutaminy-peptide cyclotransferase (glutaminy cyclase)                     | 2.32                    | 4.62x10 <sup>-2</sup> |
| 206884_s_at | sciellin                                                                   | 2.27                    | 2.05x10 <sup>-2</sup> |
| 203910_at   | Rho GTPase activating protein 29                                           | 2.26                    | 3.09x10 <sup>-3</sup> |
| 201474_s_at | integrin, alpha 3 (antigen CD49C, alpha 3 subunit of VLA-3 receptor)       | 2.21                    | 1.49x10 <sup>-4</sup> |
| 203889_at   | carboxypeptidase M                                                         | 2.2                     | 3.48x10 <sup>-2</sup> |
| 206100_at   | secretory granule, neuroendocrine protein 1 (7B2 protein)                  | 2.2                     | 8.59x10 <sup>-3</sup> |
| 201818_at   | hypothetical protein FLJ12443                                              | 2.18                    | 5.44x10 <sup>-3</sup> |
| 202525_at   | protease, serine, 8 (prostasin)                                            | 2.14                    | 4.40x10 <sup>-4</sup> |
| 212473_s_at | microtubule associated monooxygenase, calponin and LIM domain containing 2 | 2.09                    | 1.46x10 <sup>-3</sup> |
| 213524_s_at | G0/G1switch 2                                                              | 2.08                    | 9.77x10 <sup>-3</sup> |
| 209457_at   | dual specificity phosphatase 5                                             | 2.07                    | 1.53x10 <sup>-3</sup> |
| 217875_s_at | transmembrane, prostate androgen induced RNA                               | 2.05                    | 1.95x10 <sup>-3</sup> |
| 218826_at   | solute carrier family 35, member F2                                        | 2.01                    | 1.40x10 <sup>-6</sup> |
| 202437_s_at | cytochrome P450, family 1, subfamily B, polypeptide 1                      | 1.98                    | 4.03x10 <sup>-2</sup> |
| 205234_at   | solute carrier family 16 (monocarboxylic acid transporters), member 4      | 1.98                    | 6.46x10 <sup>-3</sup> |
| 202949_s_at | regulator of G-protein signalling 10                                       | 1.96                    | 1.46x10 <sup>-3</sup> |
| 204319_s_at | four and a half LIM domains 2                                              | 1.96                    | 3.03x10 <sup>-3</sup> |

**Supplemental Gene List V. Differences in Airway BC-signature Gene Expression between  
BC-high Adenocarcinoma (adenoCa) vs Squamous Cell Carcinoma (cont. page 2)**

| Probe ID    | Gene name                                                                                    | BC-high adenoCa vs SqCa |                       |
|-------------|----------------------------------------------------------------------------------------------|-------------------------|-----------------------|
|             |                                                                                              | Fold-change             | p value               |
| 203510_at   | met proto-oncogene (hepatocyte growth factor receptor)                                       | 1.94                    | 8.63x10 <sup>-3</sup> |
| 218611_at   | immediate early response 5                                                                   | 1.87                    | 1.46x10 <sup>-3</sup> |
| 218309_at   | calcium/calmodulin-dependent protein kinase II inhibitor 1                                   | 1.84                    | 2.51x10 <sup>-2</sup> |
| 201666_at   | TIMP metalloproteinase inhibitor 1                                                           | 1.82                    | 1.79x10 <sup>-4</sup> |
| 218084_x_at | FXYD domain containing ion transport regulator 5                                             | 1.79                    | 1.51x10 <sup>-3</sup> |
| 203741_s_at | adenylate cyclase 7                                                                          | 1.77                    | 5.60x10 <sup>-3</sup> |
| 218368_s_at | tumor necrosis factor receptor superfamily, member 12A                                       | 1.76                    | 1.19x10 <sup>-2</sup> |
| 205180_s_at | ADAM metalloproteinase domain 8                                                              | 1.75                    | 8.59x10 <sup>-3</sup> |
| 214091_s_at | glutathione peroxidase 3 (plasma)                                                            | 1.73                    | 3.71x10 <sup>-2</sup> |
| 221510_s_at | glutaminase                                                                                  | 1.72                    | 4.62x10 <sup>-2</sup> |
| 212859_x_at | metallothionein 1E (functional)                                                              | 1.69                    | 2.13x10 <sup>-2</sup> |
| 201506_at   | caspase recruitment domain family, member 10                                                 | 1.68                    | 3.76x10 <sup>-2</sup> |
| 210026_s_at | transforming growth factor, beta-induced, 68kDa                                              | 1.68                    | 9.77x10 <sup>-3</sup> |
| 204255_s_at | cell cycle progression 1                                                                     | 1.67                    | 2.21x10 <sup>-3</sup> |
| 214866_at   | plasminogen activator, urokinase receptor                                                    | 1.67                    | 2.17x10 <sup>-3</sup> |
| 221156_x_at | vitamin D (1,25- dihydroxyvitamin D3) receptor                                               | 1.67                    | 2.13x10 <sup>-5</sup> |
| 218718_at   | platelet derived growth factor C                                                             | 1.66                    | 3.05x10 <sup>-2</sup> |
| 221059_s_at | coactosin-like 1 (Dictyostelium)                                                             | 1.64                    | 7.41x10 <sup>-3</sup> |
| 209295_at   | tumor necrosis factor receptor superfamily, member 10b                                       | 1.63                    | 3.24x10 <sup>-4</sup> |
| 205376_at   | inositol polyphosphate-4-phosphatase, type II, 105kDa                                        | 1.6                     | 9.77x10 <sup>-3</sup> |
| 201850_at   | capping protein (actin filament), gelsolin-like                                              | 1.59                    | 2.14x10 <sup>-2</sup> |
| 209264_s_at | tetraspanin 4                                                                                | 1.59                    | 2.95x10 <sup>-2</sup> |
| 200700_s_at | KDEL (Lys-Asp-Glu-Leu) endoplasmic reticulum protein retention receptor 2                    | 1.58                    | 4.47x10 <sup>-3</sup> |
| 203234_at   | uridine phosphorylase 1                                                                      | 1.56                    | 1.80x10 <sup>-2</sup> |
| 204135_at   | downregulated in ovarian cancer 1                                                            | 1.56                    | 4.82x10 <sup>-2</sup> |
| 203414_at   | monocyte to macrophage differentiation-associated                                            | 1.55                    | 8.17x10 <sup>-3</sup> |
| 212647_at   | sulfide quinone reductase-like (yeast)                                                       | 1.54                    | 3.31x10 <sup>-3</sup> |
| 217995_at   | zinc finger protein 281                                                                      | 1.54                    | 1.48x10 <sup>-2</sup> |
| 218401_s_at | related RAS viral (r-ras) oncogene homolog                                                   | 1.54                    | 5.22x10 <sup>-4</sup> |
| 211945_s_at | chromosome 1 open reading frame 116                                                          | 1.53                    | 6.25x10 <sup>-5</sup> |
| 213010_at   | integrin, beta 1 (fibronectin receptor, beta polypeptide, antigen CD29 includes MDF2, MSK12) | 1.53                    | 6.70x10 <sup>-3</sup> |
| 219856_at   | protein kinase C, delta binding protein                                                      | 1.53                    | 3.17x10 <sup>-2</sup> |
| 200733_s_at | acyl-CoA synthetase long-chain family member 4                                               | 1.51                    | 4.62x10 <sup>-2</sup> |
| 202422_s_at | protein tyrosine phosphatase type IVA, member 1                                              | 1.51                    | 2.34x10 <sup>-2</sup> |
| 200872_at   | S100 calcium binding protein A10 (annexin II ligand, calpactin I, light polypeptide (p11))   | 1.5                     | 2.72x10 <sup>-3</sup> |



**Supplemental Gene List V. Differences in Airway BC-signature Gene Expression between  
BC-high Adenocarcinoma (adenoCa) vs Squamous Cell Carcinoma (cont. page 3)**

| Probe ID    | Gene name                                                                                        | BC-high adenoCa vs SqCa |                       |
|-------------|--------------------------------------------------------------------------------------------------|-------------------------|-----------------------|
|             |                                                                                                  | Fold-change             | p value               |
| 207357_s_at | UDP-N-acetyl-alpha-D-galactosamine:polypeptide N-acetylgalactosaminyltransferase 10 (GalNAc-T10) | 1.5                     | 2.25x10 <sup>-3</sup> |
| 212242_at   | tubulin, alpha 1 (testis specific)                                                               | 1.49                    | 1.49x10 <sup>-2</sup> |
| 202686_s_at | ras-related C3 botulinum toxin substrate 2 (rho family, small GTP binding protein Rac2)          | 1.48                    | 3.13x10 <sup>-2</sup> |
| 213603_s_at | AXL receptor tyrosine kinase                                                                     | 1.48                    | 2.29x10 <sup>-2</sup> |
| 209589_s_at | melanoma cell adhesion molecule                                                                  | 1.47                    | 1.80x10 <sup>-2</sup> |
| 210869_s_at | EPH receptor B2                                                                                  | 1.47                    | 2.84x10 <sup>-2</sup> |
| 213230_at   | paraneoplastic antigen                                                                           | 1.47                    | 2.87x10 <sup>-2</sup> |
| 203650_at   | protein C receptor, endothelial (EPCR)                                                           | 1.46                    | 3.84x10 <sup>-2</sup> |
| 212845_at   | sterile alpha motif domain containing 4                                                          | 1.44                    | 3.17x10 <sup>-2</sup> |
| 212658_at   | lipoma HMGIC fusion partner-like 2                                                               | 1.42                    | 4.19x10 <sup>-3</sup> |
| 202006_at   | pyridoxal (pyridoxine, vitamin B6) kinase                                                        | 1.41                    | 2.48x10 <sup>-2</sup> |
| 203002_at   | sema domain, immunoglobulin domain (Ig), short basic domain, secreted, (semaphorin) 3B           | 1.41                    | 5.44x10 <sup>-3</sup> |
| 203071_at   | angiomin like 2                                                                                  | 1.41                    | 1.59x10 <sup>-2</sup> |
| 218018_at   | protein tyrosine phosphatase, non-receptor type 12                                               | 1.41                    | 9.69x10 <sup>-3</sup> |
| 219256_s_at | SH3 domain and tetratricopeptide repeats 1                                                       | 1.4                     | 4.62x10 <sup>-2</sup> |
| 200600_at   | follistatin-like 3 (secreted glycoprotein)                                                       | 1.39                    | 2.56x10 <sup>-2</sup> |
| 203592_s_at | moesin                                                                                           | 1.39                    | 9.44x10 <sup>-3</sup> |
| 218817_at   | signal peptidase complex subunit 3 homolog ( <i>S. cerevisiae</i> )                              | 1.39                    | 2.29x10 <sup>-2</sup> |
| 211980_at   | collagen, type IV, alpha 1                                                                       | 1.38                    | 2.47x10 <sup>-2</sup> |
| 202720_at   | tripartite motif-containing 5                                                                    | 1.37                    | 6.72x10 <sup>-3</sup> |
| 210705_s_at | testis derived transcript (3 LIM domains)                                                        | 1.37                    | 8.63x10 <sup>-3</sup> |
| 202655_at   | multiple coagulation factor deficiency 2                                                         | 1.36                    | 5.32x10 <sup>-3</sup> |
| 210970_s_at | GTP binding protein 2                                                                            | 1.36                    | 4.46x10 <sup>-3</sup> |
| 212245_at   | arginine-rich, mutated in early stage tumors                                                     | 1.36                    | 1.73x10 <sup>-3</sup> |
| 221050_s_at | inhibitor of Bruton agammaglobulinemia tyrosine kinase                                           | 1.36                    | 2.72x10 <sup>-3</sup> |
| 201980_s_at | Ras suppressor protein 1                                                                         | 1.35                    | 1.73x10 <sup>-2</sup> |
| 212739_s_at | non-metastatic cells 4, protein expressed in                                                     | 1.35                    | 4.82x10 <sup>-2</sup> |
| 52164_at    | chromosome 11 open reading frame 24                                                              | 1.34                    | 3.17x10 <sup>-2</sup> |
| 200788_s_at | multiple C2-domains with two transmembrane regions 1                                             | 1.32                    | 2.94x10 <sup>-2</sup> |
| 220122_at   | phosphoprotein enriched in astrocytes 15                                                         | 1.32                    | 2.05x10 <sup>-2</sup> |
| 204120_s_at | proline rich Gla (G-carboxyglutamic acid) 1                                                      | 1.3                     | 2.29x10 <sup>-2</sup> |
| 205618_at   | adenosine kinase                                                                                 | 1.3                     | 4.01x10 <sup>-2</sup> |
| 221739_at   | chromosome 19 open reading frame 10                                                              | 1.3                     | 1.09x10 <sup>-2</sup> |
| 200625_s_at | CAP, adenylate cyclase-associated protein 1 (yeast)                                              | 1.28                    | 4.14x10 <sup>-2</sup> |
| 208801_at   | signal recognition particle 72kDa                                                                | 1.27                    | 4.16x10 <sup>-2</sup> |
| 202787_s_at | BH3-only member B protein                                                                        | 1.24                    | 1.56x10 <sup>-2</sup> |

**Supplemental Gene List V. Differences in Airway BC-signature Gene Expression between  
BC-high Adenocarcinoma (adenoCa) vs Squamous Cell Carcinoma (cont. page 4)**

| Probe ID    | Gene name                                                                                    | BC-high adenoCa vs SqCa |                       |
|-------------|----------------------------------------------------------------------------------------------|-------------------------|-----------------------|
|             |                                                                                              | Fold-change             | p value               |
| 218775_s_at | mitogen-activated protein kinase-activated protein kinase 3                                  | 1.24                    | 3.84x10 <sup>-2</sup> |
| 209100_at   | interferon-related developmental regulator 2                                                 | 1.23                    | 2.29x10 <sup>-2</sup> |
| 201319_at   | myosin regulatory light chain MRCL3                                                          | 1.22                    | 4.55x10 <sup>-2</sup> |
| 209190_s_at | flightless I homolog (Drosophila)                                                            | 1.19                    | 3.50x10 <sup>-2</sup> |
| 212024_x_at | diaphanous homolog 1 (Drosophila)                                                            | 1.19                    | 1.32x10 <sup>-2</sup> |
| 34187_at    | RNA binding motif, single stranded interacting protein 2                                     | 1.15                    | 1.44x10 <sup>-2</sup> |
| 209544_at   | receptor-interacting serine-threonine kinase 2                                               | 1.14                    | 1.09x10 <sup>-2</sup> |
| 220198_s_at | eukaryotic translation initiation factor 5A2                                                 | 0.89                    | 2.29x10 <sup>-2</sup> |
| 218964_at   | AT rich interactive domain 3B (BRIGHT- like)                                                 | 0.88                    | 2.92x10 <sup>-2</sup> |
| 221414_s_at | defensin, beta 126 ; defensin, beta 126                                                      | 0.86                    | 9.34x10 <sup>-3</sup> |
| 205138_s_at | pleckstrin homology domain containing, family G (with RhoGef domain) member 3                | 0.85                    | 1.46x10 <sup>-3</sup> |
| 212821_at   | elongation of very long chain fatty acids (FEN1/Elo2, SUR4/Elo3, yeast)-like 4               | 0.85                    | 2.96x10 <sup>-3</sup> |
| 219532_at   | uronyl-2-sulfotransferase                                                                    | 0.85                    | 4.64x10 <sup>-2</sup> |
| 203597_s_at | WW domain binding protein 4 (formin binding protein 21)                                      | 0.83                    | 2.82x10 <sup>-2</sup> |
| 220484_at   | mucolipin 3                                                                                  | 0.82                    | 4.29x10 <sup>-3</sup> |
| 205493_s_at | dihydropyrimidinase-like 4                                                                   | 0.81                    | 7.97x10 <sup>-3</sup> |
| 211846_s_at | poliovirus receptor-related 1 (herpesvirus entry mediator C; nectin)                         | 0.79                    | 4.62x10 <sup>-2</sup> |
| 214095_at   | serine hydroxymethyltransferase 2 (mitochondrial)                                            | 0.78                    | 2.72x10 <sup>-3</sup> |
| 215411_s_at | TRAF3 interacting protein 2                                                                  | 0.78                    | 3.20x10 <sup>-2</sup> |
| 214595_at   | chromosome 8 open reading frame 20                                                           | 0.77                    | 5.57x10 <sup>-3</sup> |
| 218421_at   | potassium voltage-gated channel, subfamily G, member 1                                       | 0.77                    | 2.29x10 <sup>-2</sup> |
| 218777_at   | ceramide kinase                                                                              | 0.77                    | 9.77x10 <sup>-3</sup> |
| 206376_at   | ankyrin repeat domain 11                                                                     | 0.76                    | 5.57x10 <sup>-3</sup> |
| 219437_s_at | solute carrier family 6, member 15                                                           | 0.76                    | 2.26x10 <sup>-2</sup> |
| 220255_at   | Fanconi anemia, complementation group E                                                      | 0.76                    | 2.12x10 <sup>-3</sup> |
| 200924_s_at | solute carrier family 3 (activators of dibasic and neutral amino acid transport), member 2   | 0.75                    | 3.71x10 <sup>-2</sup> |
| 203297_s_at | Jumonji, AT rich interactive domain 2                                                        | 0.75                    | 8.63x10 <sup>-3</sup> |
| 203438_at   | stanniocalcin 2                                                                              | 0.74                    | 2.70x10 <sup>-2</sup> |
| 219038_at   | MORC family CW-type zinc finger 4                                                            | 0.74                    | 2.95x10 <sup>-2</sup> |
| 200951_s_at | pleckstrin homology domain containing, family A (phosphoinositide binding specific) member 1 | 0.71                    | 3.84x10 <sup>-2</sup> |
| 206832_s_at | mitogen-activated protein kinase 6                                                           | 0.71                    | 8.52x10 <sup>-3</sup> |
| 207121_s_at | sema domain, immunoglobulin domain (Ig), short basic domain, secreted, (semaphorin) 3F       | 0.71                    | 3.45x10 <sup>-2</sup> |
| 210237_at   | artemin                                                                                      | 0.71                    | 7.62x10 <sup>-3</sup> |

**Supplemental Gene List V. Differences in Airway BC-signature Gene Expression between  
BC-high Adenocarcinoma (adenoCa) vs Squamous Cell Carcinoma (cont. page 5)**

| Probe ID    | Gene name                                                                                       | BC-high adenoCa vs SqCa |                       |
|-------------|-------------------------------------------------------------------------------------------------|-------------------------|-----------------------|
|             |                                                                                                 | Fold-change             | p value               |
| 219024_at   | cyclin D2                                                                                       | 0.71                    | 3.13x10 <sup>-2</sup> |
| 202067_s_at | placental growth factor, vascular endothelial growth factor-related protein                     | 0.7                     | 3.21x10 <sup>-2</sup> |
| 209652_s_at | MICAL-like 1                                                                                    | 0.7                     | 4.69x10 <sup>-2</sup> |
| 219855_at   | low density lipoprotein receptor (familial hypercholesterolemia)                                | 0.7                     | 2.13x10 <sup>-5</sup> |
| 220892_s_at | nudix (nucleoside diphosphate linked moiety X)-type motif 11                                    | 0.7                     | 1.59x10 <sup>-2</sup> |
| 221779_at   | phosphoserine aminotransferase 1                                                                | 0.7                     | 3.66x10 <sup>-2</sup> |
| 204203_at   | CCAAT/enhancer binding protein (C/EBP), gamma                                                   | 0.69                    | 3.30x10 <sup>-2</sup> |
| 214431_at   | guanine monphosphate synthetase                                                                 | 0.68                    | 3.17x10 <sup>-2</sup> |
| 202755_s_at | schwannomin interacting protein 1                                                               | 0.67                    | 8.63x10 <sup>-3</sup> |
| 204030_s_at | glypican 1                                                                                      | 0.67                    | 2.68x10 <sup>-2</sup> |
| 215780_s_at | SET translocation (myeloid leukemia-associated)                                                 | 0.67                    | 7.91x10 <sup>-3</sup> |
| 206581_at   | basonuclin 1                                                                                    | 0.66                    | 2.08x10 <sup>-4</sup> |
| 201249_at   | fibulin 1                                                                                       | 0.65                    | 2.21x10 <sup>-3</sup> |
| 201787_at   | solute carrier family 2 (facilitated glucose transporter), member 1                             | 0.65                    | 7.89x10 <sup>-3</sup> |
| 202934_at   | hexokinase 2                                                                                    | 0.63                    | 3.19x10 <sup>-2</sup> |
| 203562_at   | fasciculation and elongation protein zeta 1 (zygin I)                                           | 0.63                    | 2.93x10 <sup>-2</sup> |
| 220664_at   | small proline-rich protein 2C                                                                   | 0.62                    | 3.17x10 <sup>-2</sup> |
| 206307_s_at | forkhead box D1                                                                                 | 0.61                    | 2.29x10 <sup>-2</sup> |
| 201656_at   | integrin, alpha 6                                                                               | 0.59                    | 4.69x10 <sup>-2</sup> |
| 204165_at   | WAS protein family, member 1                                                                    | 0.58                    | 1.16x10 <sup>-2</sup> |
| 206122_at   | SRY (sex determining region Y)-box 15                                                           | 0.58                    | 5.68x10 <sup>-4</sup> |
| 213358_at   | KIAA0802                                                                                        | 0.58                    | 5.11x10 <sup>-3</sup> |
| 201397_at   | meningioma (disrupted in balanced translocation) 1                                              | 0.57                    | 2.87x10 <sup>-4</sup> |
| 205330_at   | phosphoglycerate dehydrogenase                                                                  | 0.57                    | 4.39x10 <sup>-3</sup> |
| 202779_s_at | myeloid/lymphoid or mixed-lineage leukemia (trithorax homolog, Drosophila); translocated to, 11 | 0.54                    | 7.89x10 <sup>-3</sup> |
| 211071_s_at | ubiquitin-conjugating enzyme E2S                                                                | 0.54                    | 4.62x10 <sup>-2</sup> |
| 212190_at   | serpin peptidase inhibitor, clade E (nexin, plasminogen activator inhibitor type 1), member 2   | 0.53                    | 2.94x10 <sup>-2</sup> |
| 201667_at   | hepatoma-derived growth factor, related protein 3                                               | 0.49                    | 2.06x10 <sup>-2</sup> |
| 204136_at   | collagen, type VII, alpha 1 (epidermolysis bullosa, dystrophic, dominant and recessive)         | 0.49                    | 2.02x10 <sup>-4</sup> |
| 207382_at   | gap junction protein, alpha 1, 43kDa (connexin 43)                                              | 0.49                    | 4.30x10 <sup>-5</sup> |
| 209283_at   | tumor protein p73-like                                                                          | 0.49                    | 4.19x10 <sup>-3</sup> |
| 209524_at   | crystallin, alpha B                                                                             | 0.49                    | 6.26x10 <sup>-3</sup> |

**Supplemental Gene List V. Differences in Airway BC-signature Gene Expression between  
BC-high Adenocarcinoma (adenoCa) vs Squamous Cell Carcinoma (cont. page 6)**

| Probe ID    | Gene name                                                                  | BC-high adenoCa vs SqCa |                       |
|-------------|----------------------------------------------------------------------------|-------------------------|-----------------------|
|             |                                                                            | Fold-change             | p value               |
| 201387_s_at | ubiquitin carboxyl-terminal esterase L1 (ubiquitin thiolesterase)          | 0.48                    | 3.68x10 <sup>-2</sup> |
| 203786_s_at | tumor protein D52-like 1                                                   | 0.47                    | 1.19x10 <sup>-2</sup> |
| 212702_s_at | bicaudal D homolog 2 (Drosophila)                                          | 0.47                    | 5.55x10 <sup>-5</sup> |
| 213992_at   | collagen, type IV, alpha 6                                                 | 0.46                    | 5.68x10 <sup>-4</sup> |
| 207345_at   | follistatin                                                                | 0.45                    | 2.28x10 <sup>-6</sup> |
| 202912_at   | adrenomedullin                                                             | 0.44                    | 3.03x10 <sup>-3</sup> |
| 213139_at   | snail homolog 2 (Drosophila)                                               | 0.44                    | 1.56x10 <sup>-2</sup> |
| 202712_s_at | creatine kinase, mitochondrial 1B ; creatine kinase, mitochondrial 1A      | 0.42                    | 2.02x10 <sup>-4</sup> |
| 204614_at   | serpin peptidase inhibitor, clade B (ovalbumin), member 2                  | 0.41                    | 6.51x10 <sup>-3</sup> |
| 209800_at   | Rhesus blood group, C glycoprotein                                         | 0.41                    | 4.62x10 <sup>-2</sup> |
| 219554_at   | keratin 16 (focal non-epidermolytic palmoplantar keratoderma)              | 0.41                    | 3.70x10 <sup>-4</sup> |
| 216268_s_at | jagged 1 (Alagille syndrome)                                               | 0.4                     | 3.09x10 <sup>-3</sup> |
| 210355_at   | parathyroid hormone-like hormone                                           | 0.39                    | 1.37x10 <sup>-4</sup> |
| 203184_at   | fibrillin 2 (congenital contractural arachnodactyly)                       | 0.38                    | 1.02x10 <sup>-3</sup> |
| 207030_s_at | cysteine and glycine-rich protein 2                                        | 0.38                    | 2.08x10 <sup>-4</sup> |
| 202345_s_at | annexin A8                                                                 | 0.36                    | 1.43x10 <sup>-2</sup> |
| 203074_at   | fatty acid binding protein 5 (psoriasis-associated)                        | 0.36                    | 1.06x10 <sup>-2</sup> |
| 215812_s_at | solute carrier family 6 (neurotransmitter transporter, creatine), member 8 | 0.35                    | 1.07x10 <sup>-5</sup> |
| 204268_at   | serpin peptidase inhibitor, clade B (ovalbumin), member 5                  | 0.32                    | 3.87x10 <sup>-2</sup> |
| 204855_at   | S100 calcium binding protein A2                                            | 0.32                    | 1.90x10 <sup>-2</sup> |
| 208539_x_at | small proline-rich protein 2B                                              | 0.3                     | 2.06x10 <sup>-3</sup> |
| 210854_x_at | NADH:ubiquinone oxidoreductase MLRQ subunit homolog                        | 0.28                    | 5.49x10 <sup>-6</sup> |
| 218484_at   | solute carrier family 6 (neurotransmitter transporter, creatine), member 8 | 0.28                    | 1.55x10 <sup>-4</sup> |
| 205595_at   | desmoglein 3 (pemphigus vulgaris antigen)                                  | 0.25                    | 1.37x10 <sup>-4</sup> |
| 206561_s_at | aldo-keto reductase family 1, member B10 (aldose reductase)                | 0.23                    | 3.17x10 <sup>-2</sup> |
| 204455_at   | cystatin A (stefin A)                                                      | 0.19                    | 9.46x10 <sup>-4</sup> |
| 204971_at   | dystonin                                                                   | 0.19                    | 7.10x10 <sup>-4</sup> |
| 205064_at   | small proline-rich protein 3                                               | 0.18                    | 2.12x10 <sup>-3</sup> |
| 218990_s_at | small proline-rich protein 1B (cornifin)                                   | 0.18                    | 5.55x10 <sup>-5</sup> |
| 205157_s_at | keratin 17                                                                 | 0.17                    | 3.96x10 <sup>-3</sup> |
| 206032_at   | keratin 6B                                                                 | 0.13                    | 1.33x10 <sup>-5</sup> |
| 213680_at   | desmocollin 3                                                              | 0.13                    | 1.46x10 <sup>-3</sup> |

**Supplemental Gene List V. Differences in Airway BC-signature Gene Expression between  
BC-high Adenocarcinoma (adenoCa) vs Squamous Cell Carcinoma (cont. page 7)**

| Probe ID  | Gene name                                                                            | BC-high adenoCa vs SqCa |                       |
|-----------|--------------------------------------------------------------------------------------|-------------------------|-----------------------|
|           |                                                                                      | Fold-change             | p value               |
| 213796_at | plakophilin 1 (ectodermal dysplasia/skin fragility syndrome)                         | 0.12                    | 1.10x10 <sup>-4</sup> |
| 221854_at | small proline-rich protein 1A                                                        | 0.12                    | 8.01x10 <sup>-6</sup> |
| 209125_at | keratin 6A ; keratin 6C ; keratin 6E                                                 | 0.1                     | 4.25x10 <sup>-4</sup> |
| 201820_at | keratin 5 (epidermolysis bullosa simplex, Dowling-Meara/Kobner/Weber-Cockayne types) | 0.06                    | 6.08x10 <sup>-5</sup> |
